# Supplementary material for: A pipeline for targeted metagenomics of environmental bacteria
Source: Microbiome. 2020 Feb 15;8:21. doi: 10.1186/s40168-020-0790-7 (PMC7024552; doi:10.1186/s40168-020-0790-7)
Supplement: Supplementary file 15 — Additional file 14: Table S1. Statistics of all bins created with MetaBAT from the whole community shotgun metagenome, the CF319a sorts and Vis6-814/871 sorts. Marked in bold are those bins classified as Vis6. [file 40168_2020_790_MOESM14_ESM.xlsx]

## Sheet: Sheet1
Table S1: Statistics of all bins created with MetaBAT from the whole community shotgun metagenome, the CF319a sorts and Vis6-814/871 sorts. Marked in bold are those bins classified as Vis6.
libraryID	Bin_Id	Taxonomy_contained	Completeness	Contamination	Strain_heterogeneity	GC	Genome_size_Mbp	Gene_count	Coding_density	Translation_table	NumberOf_scaffolds	NumberOf_contigs	N50_scaffolds	N50_contigs	Mean_scaffold_length_bp	Mean_contig_length_bp	Longest_scaffold_bp		MIMAG_quality
bulk_metagenome_bins_checkm_out_tree_qa2.txt	3300031230_bulk_metagenome.fa_bins.36	k__Bacteria;p__Proteobacteria;c__Alphaproteobacteria;o__Rickettsiales	100	317.58	4.55	31.8901	8.16469	9502	0.946185	11	1946	1946	4105	4105	4195	4195	56143	bulk_metagenome	-
bulk_metagenome_bins_checkm_out_tree_qa2.txt	3300031230_bulk_metagenome.fa_bins.42	k__Bacteria;p__Bacteroidetes;c__Flavobacteriia;o__Flavobacteriales;f__Flavobacteriaceae;g__Flavobacterium	98.94	0	0	30.0942	2.93568	2635	0.921009	11	7	7	560738	560738	419382	419382	1125491	bulk_metagenome	high
bulk_metagenome_bins_checkm_out_tree_qa2.txt	3300031230_bulk_metagenome.fa_bins.52	k__Bacteria;p__Bacteroidetes;c__Flavobacteriia;o__Flavobacteriales;f__Flavobacteriaceae;g__Maribacter	98.07	1.56	12.5	44.5312	5.35459	4672	0.87852	11	192	192	42457	42457	27888	27888	291163	bulk_metagenome	high
bulk_metagenome_bins_checkm_out_tree_qa2.txt	3300031230_bulk_metagenome.fa_bins.43	k__Bacteria;p__Proteobacteria;c__Gammaproteobacteria	94.16	0.64	0	41.0236	2.87244	2657	0.908953	11	45	45	110903	110903	63832	63832	293653	bulk_metagenome	high
bulk_metagenome_bins_checkm_out_tree_qa2.txt	3300031230_bulk_metagenome.fa_bins.27	k__Bacteria;p__Proteobacteria;c__Gammaproteobacteria;o__Alteromonadales;f__Alteromonadaceae	93.74	1.99	55.56	40.637	2.58635	2356	0.923085	11	126	126	44419	44419	20526	20526	109413	bulk_metagenome	high
bulk_metagenome_bins_checkm_out_tree_qa2.txt	3300031230_bulk_metagenome.fa_bins.31	k__Bacteria;p__Proteobacteria;c__Epsilonproteobacteria;o__Campylobacterales;f__Campylobacteraceae;g__Arcobacter	93.13	12.18	18.87	27.6449	1.71048	1952	0.924902	11	242	242	8064	8064	7068	7068	52923	bulk_metagenome	-
bulk_metagenome_bins_checkm_out_tree_qa2.txt	3300031230_bulk_metagenome.fa_bins.64	k__Bacteria;p__Proteobacteria;c__Gammaproteobacteria;o__Vibrionales;f__Vibrionaceae;g__Vibrio;s__Vibrio_splendidus	88.86	11.84	93.43	43.619	4.48665	4226	0.855456	11	482	482	12709	12709	9308	9308	75374	bulk_metagenome	-
bulk_metagenome_bins_checkm_out_tree_qa2.txt	3300031230_bulk_metagenome.fa_bins.25	k__Bacteria;p__Bacteroidetes;c__Flavobacteriia;o__Flavobacteriales;f__Flavobacteriaceae	86.68	22.81	46.43	34.3965	2.74495	2806	0.928865	11	344	344	10981	10981	7979	7979	77673	bulk_metagenome	-
bulk_metagenome_bins_checkm_out_tree_qa2.txt	3300031230_bulk_metagenome.fa_bins.5	k__Bacteria;p__Proteobacteria;c__Gammaproteobacteria;o__Alteromonadales_2;f__Pseudoalteromonadaceae;g__Pseudoalteromonas	86.52	1.41	90	39.2919	3.48025	3275	0.893207	11	308	308	17580	17580	11299	11299	80499	bulk_metagenome	medium
bulk_metagenome_bins_checkm_out_tree_qa2.txt	3300031230_bulk_metagenome.fa_bins.28	k__Bacteria;p__Bacteroidetes;c__Flavobacteriia;o__Flavobacteriales	86.38	2.82	100	48.2329	1.82441	1776	0.948778	11	167	167	13148	13148	10924	10924	66017	bulk_metagenome	medium
bulk_metagenome_bins_checkm_out_tree_qa2.txt	3300031230_bulk_metagenome.fa_bins.63	k__Bacteria;p__Bacteroidetes;c__Flavobacteriia;o__Flavobacteriales;f__Flavobacteriaceae	85.03	38.24	58.06	34.881	3.67225	3786	0.905863	11	715	715	5694	5694	5136	5136	22530	bulk_metagenome	-
bulk_metagenome_bins_checkm_out_tree_qa2.txt	3300031230_bulk_metagenome.fa_bins.46	k__Bacteria;p__Proteobacteria;c__Gammaproteobacteria;o__Alteromonadales;f__Alteromonadaceae	83.03	1.61	66.67	41.6116	1.93282	1954	0.923514	11	221	221	11090	11090	8745	8745	66867	bulk_metagenome	medium
bulk_metagenome_bins_checkm_out_tree_qa2.txt	3300031230_bulk_metagenome.fa_bins.56	k__Bacteria	80.9	0	0	26.073	1.20381	1187	0.905757	4	95	95	18962	18962	12671	12671	50235	bulk_metagenome	medium
bulk_metagenome_bins_checkm_out_tree_qa2.txt	3300031230_bulk_metagenome.fa_bins.14	k__Bacteria;p__Actinobacteria;c__Actinobacteria	80.25	72.38	49.23	34.1658	1.86763	2141	0.956159	11	184	184	14823	14823	10150	10150	78281	bulk_metagenome	-
bulk_metagenome_bins_checkm_out_tree_qa2.txt	3300031230_bulk_metagenome.fa_bins.48	k__Bacteria;p__Proteobacteria	73.88	49.53	12.5	31.157	1.53591	1689	0.964407	11	268	268	6353	6353	5731	5731	44394	bulk_metagenome	-
bulk_metagenome_bins_checkm_out_tree_qa2.txt	3300031230_bulk_metagenome.fa_bins.12	k__Bacteria;p__Proteobacteria;c__Epsilonproteobacteria;o__Campylobacterales;f__Campylobacteraceae;g__Arcobacter	65.02	21.62	54.43	28.7446	1.76178	2053	0.939611	11	454	454	3759	3759	3880	3880	14886	bulk_metagenome	-
bulk_metagenome_bins_checkm_out_tree_qa2.txt	3300031230_bulk_metagenome.fa_bins.33	k__Bacteria (root)	62.54	11.78	72.73	24.3864	1.13774	1244	0.899175	4	226	226	5766	5766	5034	5034	16686	bulk_metagenome	-
bulk_metagenome_bins_checkm_out_tree_qa2.txt	3300031230_bulk_metagenome.fa_bins.54	k__Bacteria;p__Proteobacteria;c__Gammaproteobacteria;o__Alteromonadales_2;f__Pseudoalteromonadaceae;g__Pseudoalteromonas	62.23	8.62	28.57	39.0918	3.0461	3080	0.907767	11	525	525	6421	6421	5802	5802	42595	bulk_metagenome	medium
bulk_metagenome_bins_checkm_out_tree_qa2.txt	3300031230_bulk_metagenome.fa_bins.13	k__Bacteria;p__Proteobacteria;c__Gammaproteobacteria;o__Alteromonadales_2;f__Pseudoalteromonadaceae;g__Pseudoalteromonas	61.99	75	59.38	39.8289	9.9548	9807	0.896457	11	1368	1368	9193	9193	7276	7276	86795	bulk_metagenome	-
bulk_metagenome_bins_checkm_out_tree_qa2.txt	3300031230_bulk_metagenome.fa_bins.34	k__Bacteria	59.96	24.79	15.62	31.7232	1.36137	1593	0.9573	11	258	258	5795	5795	5276	5276	23610	bulk_metagenome	-
bulk_metagenome_bins_checkm_out_tree_qa2.txt	3300031230_bulk_metagenome.fa_bins.15	k__Bacteria;p__Proteobacteria;c__Alphaproteobacteria;o__Rhodobacterales;f__Rhodobacteraceae	59.76	1.85	60	36.4183	1.41732	1522	0.929284	11	229	229	6940	6940	6189	6189	26939	bulk_metagenome	medium
bulk_metagenome_bins_checkm_out_tree_qa2.txt	3300031230_bulk_metagenome.fa_bins.9	k__Bacteria;p__Proteobacteria;c__Gammaproteobacteria;o__Alteromonadales_2;f__Pseudoalteromonadaceae;g__Pseudoalteromonas	59.64	25	83.33	39.5035	7.7458	7769	0.896607	11	1242	1242	7195	7195	6236	6236	68932	bulk_metagenome	-
bulk_metagenome_bins_checkm_out_tree_qa2.txt	3300031230_bulk_metagenome.fa_bins.8	k__Bacteria;p__Bacteroidetes;c__Flavobacteriia;o__Flavobacteriales;f__Flavobacteriaceae	59.48	5.17	33.33	34.495	2.2128	2261	0.920034	11	396	396	6140	6140	5587	5587	23147	bulk_metagenome	medium
bulk_metagenome_bins_checkm_out_tree_qa2.txt	3300031230_bulk_metagenome.fa_bins.30	k__Bacteria;p__Proteobacteria;c__Gammaproteobacteria	58.91	6.03	50	40.5691	3.79882	3708	0.902323	11	530	530	8453	8453	7167	7167	39359	bulk_metagenome	medium
bulk_metagenome_bins_checkm_out_tree_qa2.txt	3300031230_bulk_metagenome.fa_bins.50	k__Bacteria;p__Bacteroidetes;c__Flavobacteriia;o__Flavobacteriales;f__Flavobacteriaceae	57.61	8.71	6.45	34.79	2.10094	2117	0.932693	11	445	445	4844	4844	4721	4721	26931	bulk_metagenome	medium
bulk_metagenome_bins_checkm_out_tree_qa2.txt	3300031230_bulk_metagenome.fa_bins.21	k__Bacteria;p__Proteobacteria;c__Gammaproteobacteria	53.61	0	0	44.0632	1.18717	1234	0.922961	11	186	186	6561	6561	6382	6382	32549	bulk_metagenome	medium
bulk_metagenome_bins_checkm_out_tree_qa2.txt	3300031230_bulk_metagenome.fa_bins.19	k__Bacteria;p__Bacteroidetes;c__Flavobacteriia;o__Flavobacteriales	51.99	1.84	0	38.8133	1.80973	2094	0.929682	11	387	387	4890	4890	4676	4676	18165	bulk_metagenome	medium
bulk_metagenome_bins_checkm_out_tree_qa2.txt	3300031230_bulk_metagenome.fa_bins.3	k__Bacteria;p__Proteobacteria;c__Alphaproteobacteria;o__Rickettsiales;f__Pelagibacteraceae;g__Candidatus_Pelagibacter-like	49.83	18.89	56.72	29.935	0.849069	1029	0.958959	11	191	191	4597	4597	4445	4445	18200	bulk_metagenome	-
bulk_metagenome_bins_checkm_out_tree_qa2.txt	3300031230_bulk_metagenome.fa_bins.35	k__Bacteria;p__Proteobacteria;c__Gammaproteobacteria;o__Oceanospirillales;f__Oceanospirillaceae	47.24	13.79	0	40.5261	1.89074	2016	0.908231	11	365	365	5498	5498	5180	5180	20737	bulk_metagenome	-
bulk_metagenome_bins_checkm_out_tree_qa2.txt	3300031230_bulk_metagenome.fa_bins.59	k__Bacteria;p__Proteobacteria;c__Gammaproteobacteria	46.13	4.68	29.17	36.6883	0.918741	1048	0.965836	11	153	153	6916	6916	6004	6004	24493	bulk_metagenome	low
bulk_metagenome_bins_checkm_out_tree_qa2.txt	3300031230_bulk_metagenome.fa_bins.41	k__Bacteria;p__Proteobacteria;c__Alphaproteobacteria;o__Rhodobacterales;f__Rhodobacteraceae	35.11	1.72	100	55.5493	0.706471	833	0.930177	11	163	163	4481	4481	4334	4334	13385	bulk_metagenome	low
bulk_metagenome_bins_checkm_out_tree_qa2.txt	3300031230_bulk_metagenome.fa_bins.62	k__Bacteria;p__Proteobacteria;c__Gammaproteobacteria	34.23	1.35	0	42.2652	1.14378	1223	0.904942	11	257	257	4452	4452	4450	4450	14239	bulk_metagenome	low
bulk_metagenome_bins_checkm_out_tree_qa2.txt	3300031230_bulk_metagenome.fa_bins.61	k__Bacteria;p__Bacteroidetes;c__Flavobacteriia;o__Flavobacteriales;f__Flavobacteriaceae	32.76	1.72	100	34.8419	0.677435	665	0.919862	11	106	106	7139	7139	6390	6390	23048	bulk_metagenome	low
bulk_metagenome_bins_checkm_out_tree_qa2.txt	3300031230_bulk_metagenome.fa_bins.20	k__Archaea;p__Euryarchaeota;c__Methanomicrobia;o__Methanosarcinales;f__Methanosarcinaceae	30.37	0	0	37.3572	0.645629	592	0.95334	11	15	15	102858	102858	43041	43041	124941	bulk_metagenome	low
bulk_metagenome_bins_checkm_out_tree_qa2.txt	3300031230_bulk_metagenome.fa_bins.2	k__Bacteria;p__Bacteroidetes;c__Flavobacteriia;o__Flavobacteriales;f__Flavobacteriaceae;g__Tenacibaculum	30.17	1.72	100	31.0321	0.622614	644	0.929621	11	181	181	3423	3423	3439	3439	8081	bulk_metagenome	low
bulk_metagenome_bins_checkm_out_tree_qa2.txt	3300031230_bulk_metagenome.fa_bins.53	k__Bacteria;p__Proteobacteria;c__Alphaproteobacteria;o__Rhodobacterales;f__Rhodobacteraceae	30.17	0	0	51.9998	1.17432	1274	0.909695	11	259	259	4758	4758	4534	4534	19944	bulk_metagenome	low
bulk_metagenome_bins_checkm_out_tree_qa2.txt	3300031230_bulk_metagenome.fa_bins.51	k__Bacteria	27.34	1.24	50	28.5361	0.409257	415	0.918284	4	115	115	3314	3314	3558	3558	10580	bulk_metagenome	low
bulk_metagenome_bins_checkm_out_tree_qa2.txt	3300031230_bulk_metagenome.fa_bins.58	k__Archaea;p__Euryarchaeota	25.64	0	0	38.415	0.394552	304	0.935732	11	12	12	88304	88304	32879	32879	142389	bulk_metagenome	low
bulk_metagenome_bins_checkm_out_tree_qa2.txt	3300031230_bulk_metagenome.fa_bins.57	k__Bacteria;p__Bacteroidetes;c__Flavobacteriia;o__Flavobacteriales;f__Flavobacteriaceae	23.28	0	0	34.6194	0.76956	806	0.933068	11	198	198	3801	3801	3886	3886	13719	bulk_metagenome	low
bulk_metagenome_bins_checkm_out_tree_qa2.txt	3300031230_bulk_metagenome.fa_bins.24	k__Archaea;p__Euryarchaeota	22.9	0	0	38.44	0.340929	301	0.950022	11	7	7	73517	73517	48704	48704	110723	bulk_metagenome	low
bulk_metagenome_bins_checkm_out_tree_qa2.txt	3300031230_bulk_metagenome.fa_bins.26	k__Bacteria;p__Bacteroidetes;c__Flavobacteriia;o__Flavobacteriales;f__Flavobacteriaceae	20.69	0	0	34.8961	2.10945	2209	0.89756	11	547	547	3817	3817	3856	3856	16478	bulk_metagenome	low
bulk_metagenome_bins_checkm_out_tree_qa2.txt	3300031230_bulk_metagenome.fa_bins.47	k__Bacteria;p__Proteobacteria;c__Gammaproteobacteria	20.14	0	0	36.6334	0.353541	425	0.968784	11	90	90	3943	3943	3928	3928	10207	bulk_metagenome	low
bulk_metagenome_bins_checkm_out_tree_qa2.txt	3300031230_bulk_metagenome.fa_bins.37	k__Bacteria;p__Proteobacteria;c__Alphaproteobacteria;o__Rickettsiales;f__Pelagibacteraceae;g__Candidatus_Pelagibacter-like	19.22	0.47	0	30.3044	0.344326	422	0.955432	11	82	82	4316	4316	4199	4199	18369	bulk_metagenome	low
bulk_metagenome_bins_checkm_out_tree_qa2.txt	3300031230_bulk_metagenome.fa_bins.18	k__Bacteria;p__Proteobacteria;c__Alphaproteobacteria;o__Rickettsiales	17.54	0	0	34.4714	0.374917	419	0.964774	11	94	94	3931	3931	3988	3988	8960	bulk_metagenome	low
bulk_metagenome_bins_checkm_out_tree_qa2.txt	3300031230_bulk_metagenome.fa_bins.17	k__Bacteria;p__Proteobacteria;c__Gammaproteobacteria	17.24	0	0	50.6254	0.694559	721	0.889726	11	138	138	5329	5329	5033	5033	14669	bulk_metagenome	low
bulk_metagenome_bins_checkm_out_tree_qa2.txt	3300031230_bulk_metagenome.fa_bins.29	NA	12.5	0	0	39.9079	1.52453	1537	0.908663	11	329	329	4706	4706	4633	4633	37561	bulk_metagenome	low
bulk_metagenome_bins_checkm_out_tree_qa2.txt	3300031230_bulk_metagenome.fa_bins.1	k__Bacteria;p__Proteobacteria;c__Gammaproteobacteria;o__Alteromonadales_2;f__Pseudoalteromonadaceae;g__Pseudoalteromonas	9.48	0	0	40.6667	0.556217	595	0.901979	11	117	117	4804	4804	4753	4753	11982	bulk_metagenome	low
bulk_metagenome_bins_checkm_out_tree_qa2.txt	3300031230_bulk_metagenome.fa_bins.23	k__Bacteria;p__Proteobacteria;c__Gammaproteobacteria	8.62	0	0	36.9353	0.316302	353	0.958764	11	66	66	5539	5539	4792	4792	14454	bulk_metagenome	low
bulk_metagenome_bins_checkm_out_tree_qa2.txt	3300031230_bulk_metagenome.fa_bins.16	NA	8.33	0	0	31.3414	0.688325	936	0.854736	11	160	160	4398	4398	4302	4302	12386	bulk_metagenome	low
bulk_metagenome_bins_checkm_out_tree_qa2.txt	3300031230_bulk_metagenome.fa_bins.39	NA	4.17	0	0	35.8864	0.222742	261	0.926691	11	62	62	3731	3731	3592	3592	5919	bulk_metagenome	low
bulk_metagenome_bins_checkm_out_tree_qa2.txt	3300031230_bulk_metagenome.fa_bins.7	NA	4.17	0	0	54.4828	0.246843	273	0.938273	11	48	48	5503	5503	5142	5142	17284	bulk_metagenome	low
bulk_metagenome_bins_checkm_out_tree_qa2.txt	3300031230_bulk_metagenome.fa_bins.55	k__Bacteria;p__Proteobacteria;c__Gammaproteobacteria;o__Alteromonadales_3;f__Alteromonadaceae	1.72	0	0	54.8412	0.211208	221	0.929932	11	46	46	4486	4486	4591	4591	13135	bulk_metagenome	low
bulk_metagenome_bins_checkm_out_tree_qa2.txt	3300031230_bulk_metagenome.fa_bins.38	k__Bacteria (root)	0.31	0	0	41.5451	0.203923	236	0.94393	11	6	6	40515	40515	33987	33987	73382	bulk_metagenome	low
bulk_metagenome_bins_checkm_out_tree_qa2.txt	3300031230_bulk_metagenome.fa_bins.10	NA	0	0	0	36.24	0.585718	801	0.96673	11	38	38	22122	22122	15413	15413	55564	bulk_metagenome	low
bulk_metagenome_bins_checkm_out_tree_qa2.txt	3300031230_bulk_metagenome.fa_bins.11	NA	0	0	0	35.4564	0.201927	259	0.96007	11	17	17	14973	14973	11878	11878	53159	bulk_metagenome	low
bulk_metagenome_bins_checkm_out_tree_qa2.txt	3300031230_bulk_metagenome.fa_bins.22	NA	0	0	0	49.1499	0.230442	251	0.932647	11	47	47	5272	5272	4903	4903	12316	bulk_metagenome	low
bulk_metagenome_bins_checkm_out_tree_qa2.txt	3300031230_bulk_metagenome.fa_bins.32	NA	0	0	0	28.5986	0.218955	390	0.913959	11	38	38	6045	6045	5761	5761	29568	bulk_metagenome	low
bulk_metagenome_bins_checkm_out_tree_qa2.txt	3300031230_bulk_metagenome.fa_bins.4	NA	0	0	0	39.3602	0.652753	711	0.864983	11	4	4	469513	469513	163188	163188	469513	bulk_metagenome	low
bulk_metagenome_bins_checkm_out_tree_qa2.txt	3300031230_bulk_metagenome.fa_bins.40	NA	0	0	0	62.7205	0.336389	413	0.951987	11	92	92	3697	3697	3656	3656	7535	bulk_metagenome	low
bulk_metagenome_bins_checkm_out_tree_qa2.txt	3300031230_bulk_metagenome.fa_bins.44	NA	0	0	0	36.7546	0.672635	751	0.89193	11	85	85	12686	12686	7913	7913	31633	bulk_metagenome	low
bulk_metagenome_bins_checkm_out_tree_qa2.txt	3300031230_bulk_metagenome.fa_bins.45	NA	0	0	0	38.6665	0.214038	322	0.945463	11	24	24	10878	10878	8918	8918	27940	bulk_metagenome	low
bulk_metagenome_bins_checkm_out_tree_qa2.txt	3300031230_bulk_metagenome.fa_bins.49	NA	0	0	0	37.9217	0.34808	415	0.945398	11	9	9	82144	82144	38675	38675	98081	bulk_metagenome	low
bulk_metagenome_bins_checkm_out_tree_qa2.txt	3300031230_bulk_metagenome.fa_bins.6	NA	0	0	0	59.651	0.957585	1081	0.86497	11	37	37	59218	59218	25880	25880	135732	bulk_metagenome	low
bulk_metagenome_bins_checkm_out_tree_qa2.txt	3300031230_bulk_metagenome.fa_bins.60	NA	0	0	0	36.699	0.226783	241	0.860175	11	28	28	10793	10793	8099	8099	39223	bulk_metagenome	low
bulk_metagenome_bins_checkm_out_tree_qa2.txt	3300031230_bulk_metagenome.fa_bins.65	NA	0	0	0	45.9708	0.364779	522	0.879349	11	2	2	298572	298572	182389	182389	298572	bulk_metagenome	low
bulk_metagenome_bins_checkm_out_tree_qa2.txt	3300031230_bulk_metagenome.fa_bins.66	NA	0	0	0	39.044	0.239471	288	0.96215	11	1	1	239471	239471	239471	239471	239471	bulk_metagenome	low
metabat_cnzag_bins_checkm_out_tree_qa2.txt	3300031336.a.fna.fa_bins.2	NA	100	264	11.89	33.2931	18.7987	19084	0.899397	11	1979	2532	13883	13012	9499	7421	155894	CF_Ethanol_FISH	-
metabat_cnzag_bins_checkm_out_tree_qa2.txt	3300031350.a.fna.fa_bins.5	k__Bacteria;p__Bacteroidetes;c__Flavobacteriia;o__Flavobacteriales;f__Flavobacteriaceae;g__Flavobacterium	100	208.35	16.95	32.9502	11.9114	12336	0.900298	11	1446	1727	10352	9898	8237	6894	289683	CF_Ethanol_FISH	-
metabat_cnzag_bins_checkm_out_tree_qa2.txt	3300031434.a.fna.fa_bins.5	NA	100	355.08	12.24	33.8955	19.8098	20085	0.903185	11	2270	2856	11877	11003	8726	6933	211699	CF_Ethanol_FISH	-
metabat_cnzag_bins_checkm_out_tree_qa2.txt	3300031433.a.fna.fa_bins.3	k__Bacteria;p__Bacteroidetes;c__Flavobacteriia;o__Flavobacteriales;f__Flavobacteriaceae;g__Gramella	97.81	124.13	38.85	36.3087	9.01477	8972	0.909691	11	1006	1207	13096	12422	8961	7466	74744	CF_Ethanol_FISH	-
metabat_cnzag_bins_checkm_out_tree_qa2.txt	3300031336.a.fna.fa_bins.5	k__Bacteria;p__Bacteroidetes;c__Flavobacteriia;o__Flavobacteriales;f__Flavobacteriaceae;g__Gramella	93.61	132.47	32.78	36.6871	6.42004	6409	0.916746	11	742	896	11942	11406	8652	7161	95874	CF_Ethanol_FISH	-
metabat_cnzag_bins_checkm_out_tree_qa2.txt	3300031350.a.fna.fa_bins.4	k__Bacteria;p__Bacteroidetes;c__Flavobacteriia;o__Flavobacteriales;f__Flavobacteriaceae;g__Gramella	79.14	94.83	52.75	37.3261	6.15502	6278	0.912887	11	747	879	10260	9882	8239	7000	47874	CF_Ethanol_FISH	-
metabat_cnzag_bins_checkm_out_tree_qa2.txt	3300031432.a.fna.fa_bins.5	k__Bacteria;p__Bacteroidetes;c__Flavobacteriia;o__Flavobacteriales;f__Flavobacteriaceae;g__Gramella	69.39	43.1	72.97	37.5092	4.3071	4302	0.912916	11	510	602	11327	11159	8445	7152	60671	CF_Ethanol_FISH	-
metabat_cnzag_bins_checkm_out_tree_qa2.txt	3300031434.a.fna.fa_bins.6	k__Bacteria;p__Bacteroidetes;c__Flavobacteriia;o__Flavobacteriales;f__Flavobacteriaceae;g__Gramella	65.8	33.65	49.45	38.4996	3.22397	3166	0.918207	11	399	476	11027	10524	8080	6770	63318	CF_Ethanol_FISH	-
metabat_cnzag_bins_checkm_out_tree_qa2.txt	3300031336.a.fna.fa_bins.7	k__Bacteria;p__Bacteroidetes;c__Flavobacteriia;o__Flavobacteriales;f__Flavobacteriaceae	50.86	7.76	33.33	39.1958	2.21932	2305	0.91457	11	242	310	12893	12128	9170	7156	38000	CF_Ethanol_FISH	medium
metabat_cnzag_bins_checkm_out_tree_qa2.txt	3300031433.a.fna.fa_bins.6	k__Bacteria;p__Bacteroidetes;c__Flavobacteriia;o__Flavobacteriales;f__Flavobacteriaceae;g__Maribacter	30.17	6.74	88.89	45.9287	1.13657	1131	0.877956	11	131	164	12080	11603	8676	6928	36005	CF_Ethanol_FISH	low
metabat_cnzag_bins_checkm_out_tree_qa2.txt	3300031350.a.fna.fa_bins.1	k__Bacteria;p__Bacteroidetes;c__Sphingobacteriia;o__Sphingobacteriales;f__Saprospiraceae;g__Lewinella	27.15	1	0	57.1219	0.837395	798	0.910571	11	87	107	13784	13166	9625	7824	34297	CF_Ethanol_FISH	low
metabat_cnzag_bins_checkm_out_tree_qa2.txt	3300031336.a.fna.fa_bins.3	k__Bacteria;p__Bacteroidetes;c__Flavobacteriia;o__Flavobacteriales;f__Flavobacteriaceae;g__Maribacter	25.29	0	0	46.5757	1.25965	1138	0.8902	11	95	127	19390	19006	13259	9914	53895	CF_Ethanol_FISH	low
metabat_cnzag_bins_checkm_out_tree_qa2.txt	3300031432.a.fna.fa_bins.4	k__Bacteria;p__Bacteroidetes;c__Flavobacteriia;o__Flavobacteriales;f__Flavobacteriaceae	23.43	3.45	100	45.4728	1.69664	1673	0.880232	11	202	258	11101	10130	8399	6572	66033	CF_Ethanol_FISH	low
metabat_cnzag_bins_checkm_out_tree_qa2.txt	3300031434.a.fna.fa_bins.1	k__Bacteria;p__Bacteroidetes;c__Flavobacteriia;o__Flavobacteriales;f__Flavobacteriaceae	22.41	0	0	39.9489	0.919854	857	0.883652	11	107	129	12733	11138	8596	7128	26622	CF_Ethanol_FISH	low
metabat_cnzag_bins_checkm_out_tree_qa2.txt	3300031433.a.fna.fa_bins.7	k__Bacteria;p__Bacteroidetes;c__Sphingobacteriia;o__Sphingobacteriales;f__Saprospiraceae;g__Lewinella	21.03	0	0	57.6391	0.516128	549	0.890632	11	82	99	6873	6816	6294	5211	22453	CF_Ethanol_FISH	low
metabat_cnzag_bins_checkm_out_tree_qa2.txt	3300031432.a.fna.fa_bins.7	k__Bacteria;p__Bacteroidetes;c__Flavobacteriia;o__Flavobacteriales;f__Flavobacteriaceae	19.44	0	0	42.8642	0.572395	575	0.901371	11	54	67	15268	14100	10599	8541	42204	CF_Ethanol_FISH	low
metabat_cnzag_bins_checkm_out_tree_qa2.txt	3300031432.a.fna.fa_bins.3	k__Bacteria;p__Bacteroidetes;c__Flavobacteriia;o__Flavobacteriales;f__Flavobacteriaceae	18.97	0	0	39.5874	0.478048	505	0.909208	11	56	65	12001	12001	8536	7353	29943	CF_Ethanol_FISH	low
metabat_cnzag_bins_checkm_out_tree_qa2.txt	3300031432.a.fna.fa_bins.6	k__Bacteria;p__Bacteroidetes;c__Sphingobacteriia;o__Sphingobacteriales;f__Saprospiraceae	15.52	0	0	35.25	0.832599	709	0.908279	11	79	91	12974	12974	10539	9148	54664	CF_Ethanol_FISH	low
metabat_cnzag_bins_checkm_out_tree_qa2.txt	3300031350.a.fna.fa_bins.2	k__Bacteria;p__Bacteroidetes;c__Flavobacteriia;o__Flavobacteriales;f__Flavobacteriaceae	13.79	0	0	40.7966	0.731401	697	0.88777	11	93	109	9191	8235	7864	6708	39368	CF_Ethanol_FISH	low
metabat_cnzag_bins_checkm_out_tree_qa2.txt	3300031434.a.fna.fa_bins.3	k__Bacteria;p__Bacteroidetes;c__Flavobacteriia;o__Flavobacteriales;f__Flavobacteriaceae;g__Maribacter	12.93	0	0	47.2044	0.670425	635	0.872881	11	62	79	18342	18245	10813	8483	54823	CF_Ethanol_FISH	low
metabat_cnzag_bins_checkm_out_tree_qa2.txt	3300031432.a.fna.fa_bins.1	NA	12.5	0	0	40.1876	0.308884	321	0.902106	11	34	39	12235	12235	9084	7918	33464	CF_Ethanol_FISH	low
metabat_cnzag_bins_checkm_out_tree_qa2.txt	3300031336.a.fna.fa_bins.4	k__Bacteria;p__Bacteroidetes;c__Flavobacteriia;o__Flavobacteriales;f__Flavobacteriaceae	10.34	0	0	40.6409	0.686901	623	0.893507	11	82	98	10083	9560	8376	7007	31420	CF_Ethanol_FISH	low
metabat_cnzag_bins_checkm_out_tree_qa2.txt	3300031434.a.fna.fa_bins.4	NA	8.33	0	0	39.3433	0.260177	260	0.899322	11	29	41	15251	15191	8971	6342	30790	CF_Ethanol_FISH	low
metabat_cnzag_bins_checkm_out_tree_qa2.txt	3300031336.a.fna.fa_bins.8	k__Bacteria;p__Bacteroidetes;c__Sphingobacteriia;o__Sphingobacteriales;f__Saprospiraceae	7.76	0	0	38.1905	0.598817	555	0.909226	11	54	79	16477	14010	11089	7576	41684	CF_Ethanol_FISH	low
metabat_cnzag_bins_checkm_out_tree_qa2.txt	3300031336.a.fna.fa_bins.9	k__Bacteria;p__Bacteroidetes;c__Flavobacteriia;o__Flavobacteriales	6.9	0	0	42.3666	0.321344	312	0.905603	11	31	33	15373	15373	10365	9737	29146	CF_Ethanol_FISH	low
metabat_cnzag_bins_checkm_out_tree_qa2.txt	3300031434.a.fna.fa_bins.7	k__Bacteria;p__Bacteroidetes;c__Sphingobacteriia;o__Sphingobacteriales;f__Saprospiraceae;g__Lewinella	5.5	0.25	0	59.9655	0.200372	205	0.906783	11	22	28	14222	14222	9107	7154	24820	CF_Ethanol_FISH	low
metabat_cnzag_bins_checkm_out_tree_qa2.txt	3300031433.a.fna.fa_bins.4	k__Bacteria;p__Bacteroidetes;c__Flavobacteriia;o__Flavobacteriales;f__Flavobacteriaceae	5.17	0	0	41.4707	0.20179	192	0.913871	11	21	26	12029	11522	9609	7759	37123	CF_Ethanol_FISH	low
metabat_cnzag_bins_checkm_out_tree_qa2.txt	3300031433.a.fna.fa_bins.5	k__Bacteria;p__Bacteroidetes;c__Flavobacteriia;o__Flavobacteriales;f__Flavobacteriaceae	4.39	0	0	42.1164	0.228316	249	0.885015	11	26	34	11375	9558	8781	6711	25376	CF_Ethanol_FISH	low
metabat_cnzag_bins_checkm_out_tree_qa2.txt	3300031336.a.fna.fa_bins.10	NA	4.17	0	0	39.6788	0.395032	404	0.878653	11	49	60	12776	12776	8061	6581	26706	CF_Ethanol_FISH	low
metabat_cnzag_bins_checkm_out_tree_qa2.txt	3300031336.a.fna.fa_bins.6	NA	4.17	0	0	40.1393	0.809815	752	0.92285	11	83	112	14501	13755	9756	7227	43859	CF_Ethanol_FISH	low
metabat_cnzag_bins_checkm_out_tree_qa2.txt	3300031350.a.fna.fa_bins.3	NA	4.17	0	0	44.9465	0.215099	218	0.868126	11	31	34	7399	7399	6938	6325	26986	CF_Ethanol_FISH	low
metabat_cnzag_bins_checkm_out_tree_qa2.txt	3300031350.a.fna.fa_bins.6	NA	4.17	0	0	41.1939	0.210669	195	0.896188	11	20	26	11845	11484	10533	8100	36597	CF_Ethanol_FISH	low
metabat_cnzag_bins_checkm_out_tree_qa2.txt	3300031434.a.fna.fa_bins.2	k__Bacteria;p__Bacteroidetes;c__Flavobacteriia;o__Flavobacteriales;f__Flavobacteriaceae	3.45	0	0	41.0082	0.294014	303	0.894903	11	31	38	14035	14035	9484	7735	40452	CF_Ethanol_FISH	low
metabat_cnzag_bins_checkm_out_tree_qa2.txt	3300031336.a.fna.fa_bins.1	NA	0	0	0	41.2237	0.201985	220	0.909355	11	26	31	10698	10698	7768	6514	21656	CF_Ethanol_FISH	low
metabat_cnzag_bins_checkm_out_tree_qa2.txt	3300031432.a.fna.fa_bins.2	NA	0	0	0	37.8982	0.206504	172	0.867547	11	21	30	12062	12062	9833	6879	25392	CF_Ethanol_FISH	low
metabat_cnzag_bins_checkm_out_tree_qa2.txt	3300031433.a.fna.fa_bins.1	NA	0	0	0	39.9613	0.357658	329	0.888589	11	38	51	13357	12343	9412	7010	25930	CF_Ethanol_FISH	low
metabat_cnzag_bins_checkm_out_tree_qa2.txt	3300031433.a.fna.fa_bins.2	NA	0	0	0	38.7993	0.675045	609	0.904353	11	64	84	15217	15217	10547	8032	31754	CF_Ethanol_FISH	low
metabat_cnzag_bins_checkm_out_tree_qa2.txt	3300031433.a.fna.fa_bins.8	NA	0	0	0	39.0942	0.292356	307	0.871325	11	44	53	7877	7599	6644	5514	25979	CF_Ethanol_FISH	low
metabat_cnzag_bins_checkm_out_tree_qa2.txt	3300031272.a.fna.fa_bins.1	k__Bacteria;p__Bacteroidetes;c__Flavobacteriia;o__Flavobacteriales;f__Flavobacteriaceae;g__Flavobacterium	98.28	175.89	22.92	33.3432	8.36779	8605	0.905974	11	1046	1162	10250	10028	7999	7198	158805	CF_Unfixed_FISH	-
metabat_cnzag_bins_checkm_out_tree_qa2.txt	3300031272.a.fna.fa_bins.2	k__Bacteria;p__Bacteroidetes;c__Flavobacteriia;o__Flavobacteriales;f__Flavobacteriaceae;g__Gramella	37.54	4.94	45.83	38.573	1.20895	1239	0.909187	11	143	163	10500	10442	8454	7413	57667	CF_Unfixed_FISH	low
metabat_cnzag_bins_checkm_out_tree_qa2.txt	3300031338.a.fna.fa_bins.1	NA	0	0	0	48.1552	0.206604	165	0.878681	11	22	24	12795	12795	9391	8607	24786	CF_Unfixed_FISH	low
metabat_cnzag_bins_checkm_out_tree_qa2.txt	3300031338.a.fna.fa_bins.2	k__Bacteria;p__Bacteroidetes;c__Flavobacteriia;o__Flavobacteriales;f__Flavobacteriaceae	10.53	0	0	48.7559	0.330427	341	0.954232	11	33	35	11577	11577	10012	9440	21264	CF_Unfixed_FISH	low
metabat_cnzag_bins_checkm_out_tree_qa2.txt	3300031338.a.fna.fa_bins.3	k__Bacteria;p__Bacteroidetes;c__Flavobacteriia;o__Flavobacteriales;f__Flavobacteriaceae;g__Gramella	27.43	1.72	100	38.552	1.04636	1032	0.914855	11	145	160	8785	8512	7216	6536	35610	CF_Unfixed_FISH	low
metabat_cnzag_bins_checkm_out_tree_qa2.txt	3300031338.a.fna.fa_bins.4	k__Bacteria;p__Bacteroidetes;c__Flavobacteriia;o__Flavobacteriales;f__Flavobacteriaceae	93.89	120.5	11.03	33.4102	8.21107	8626	0.902724	11	1107	1256	8900	8679	7417	6535	65085	CF_Unfixed_FISH	-
metabat_cnzag_bins_checkm_out_tree_qa2.txt	3300031338.a.fna.fa_bins.5	k__Bacteria;p__Bacteroidetes;c__Flavobacteriia;o__Flavobacteriales;f__Flavobacteriaceae	16.61	0	0	42.3609	0.401454	404	0.909641	11	40	47	13558	13147	10036	8540	33044	CF_Unfixed_FISH	low
metabat_cnzag_bins_checkm_out_tree_qa2.txt	3300031352.a.fna.fa_bins.1	NA	0	0	0	59.511	0.299403	336	0.877536	11	30	35	16349	16349	9980	8552	29879	CF_Unfixed_FISH	low
metabat_cnzag_bins_checkm_out_tree_qa2.txt	3300031352.a.fna.fa_bins.2	k__Bacteria;p__Bacteroidetes;c__Flavobacteriia;o__Flavobacteriales;f__Flavobacteriaceae;g__Flavobacterium	94.51	131.61	15.2	32.8921	6.97945	7287	0.902108	11	995	1091	8674	8451	7014	6395	94614	CF_Unfixed_FISH	-
metabat_cnzag_bins_checkm_out_tree_qa2.txt	3300031352.a.fna.fa_bins.3	k__Bacteria;p__Bacteroidetes;c__Flavobacteriia;o__Flavobacteriales;f__Flavobacteriaceae;g__Gramella	46.55	6.9	100	37.356	1.75475	1699	0.916981	11	198	211	12386	12386	8862	8313	54468	CF_Unfixed_FISH	low
metabat_cnzag_bins_checkm_out_tree_qa2.txt	3300031376.a.fna.fa_bins.1	k__Bacteria;p__Bacteroidetes;c__Flavobacteriia;o__Flavobacteriales;f__Flavobacteriaceae	10.34	0	0	41.1087	0.328739	327	0.88817	11	35	39	17353	17353	9392	8428	36956	CF_Unfixed_FISH	low
metabat_cnzag_bins_checkm_out_tree_qa2.txt	3300031376.a.fna.fa_bins.2	k__Bacteria;p__Bacteroidetes;c__Flavobacteriia;o__Flavobacteriales;f__Flavobacteriaceae;g__Flavobacterium	91.83	131	6.75	33.8009	7.91767	8135	0.901225	11	929	1064	11626	11172	8522	7439	88111	CF_Unfixed_FISH	-
metabat_cnzag_bins_checkm_out_tree_qa2.txt	3300031376.a.fna.fa_bins.3	k__Bacteria;p__Bacteroidetes;c__Flavobacteriia;o__Flavobacteriales;f__Flavobacteriaceae;g__Gramella	80.63	74.29	30.79	36.2601	4.3453	4377	0.913703	11	509	581	11139	10449	8536	7475	89749	CF_Unfixed_FISH	-
metabat_cnzag_bins_checkm_out_tree_qa2.txt	3300031386.a.fna.fa_bins.1	k__Bacteria;p__Bacteroidetes;c__Flavobacteriia;o__Flavobacteriales;f__Flavobacteriaceae	60.97	37.23	53.97	37.1722	2.17636	2286	0.909479	11	331	358	8118	7923	6575	6078	42412	CF_Unfixed_FISH	-
metabat_cnzag_bins_checkm_out_tree_qa2.txt	3300031266.a.fna.fa_bins.1	k__Bacteria;p__Verrucomicrobia	1.72	0	0	54.3872	0.257837	262	0.92605	11	32	39	10284	10284	8057	6609	31342	Vis6_Ethanol_FISH	low
metabat_cnzag_bins_checkm_out_tree_qa2.txt	3300031266.a.fna.fa_bins.2	NA	0	0	0	36.3981	0.20189	203	0.93391	11	20	25	12594	12594	10094	8073	38172	Vis6_Ethanol_FISH	low
metabat_cnzag_bins_checkm_out_tree_qa2.txt	3300031266.a.fna.fa_bins.3	k__Bacteria;p__Bacteroidetes;c__Flavobacteriia;o__Flavobacteriales	10.34	0	0	40.3725	0.727299	751	0.915794	11	96	112	9356	9238	7576	6491	45973	Vis6_Ethanol_FISH	low
metabat_cnzag_bins_checkm_out_tree_qa2.txt	3300031266.a.fna.fa_bins.4	NA	4.17	0	0	39.0917	0.603823	658	0.875606	11	89	102	8550	8381	6784	5918	46388	Vis6_Ethanol_FISH	low
metabat_cnzag_bins_checkm_out_tree_qa2.txt	3300031266.a.fna.fa_bins.5	k__Bacteria;p__Bacteroidetes;c__Flavobacteriia;o__Flavobacteriales;f__Flavobacteriaceae;g__Gramella	3.45	0	0	36.2302	0.24164	258	0.910603	11	32	38	9213	9213	7551	6357	24180	Vis6_Ethanol_FISH	low
metabat_cnzag_bins_checkm_out_tree_qa2.txt	3300031266.a.fna.fa_bins.6	k__Bacteria;p__Proteobacteria;c__Gammaproteobacteria;o__Alteromonadales;f__Alteromonadaceae	5.33	0	0	41.2295	0.238083	262	0.901942	11	44	57	6072	5432	5410	4174	31849	Vis6_Ethanol_FISH	low
metabat_cnzag_bins_checkm_out_tree_qa2.txt	3300031266.a.fna.fa_bins.7	k__Bacteria;p__Bacteroidetes;c__Flavobacteriia;o__Flavobacteriales	65.44	6.99	75	48.2927	1.60864	1580	0.941891	11	200	211	10488	10201	8043	7599	70925	Vis6_Ethanol_FISH	medium
metabat_cnzag_bins_checkm_out_tree_qa2.txt	3300031266.a.fna.fa_bins.8	k__Bacteria;p__Bacteroidetes;c__Flavobacteriia;o__Flavobacteriales;f__Flavobacteriaceae	37.55	12.76	3.19	32.0275	1.4288	1591	0.920032	11	230	281	7032	6868	6212	5082	28012	Vis6_Ethanol_FISH	-
metabat_cnzag_bins_checkm_out_tree_qa2.txt	3300031373.a.fna.fa_bins.1	k__Bacteria;p__Bacteroidetes;c__Flavobacteriia;o__Flavobacteriales;f__Flavobacteriaceae	31.19	8.78	0	31.5065	0.844384	956	0.907535	11	141	160	6715	6715	5988	5275	44664	Vis6_Ethanol_FISH	low
metabat_cnzag_bins_checkm_out_tree_qa2.txt	3300031373.a.fna.fa_bins.2	NA	4.17	0	0	63.5127	0.388088	419	0.826753	11	42	59	17706	12151	9240	6574	76868	Vis6_Ethanol_FISH	low
metabat_cnzag_bins_checkm_out_tree_qa2.txt	3300031373.a.fna.fa_bins.3	k__Bacteria;p__Verrucomicrobia;c__Verrucomicrobiae;o__Verrucomicrobiales;f__Verrucomicrobiaceae	2.41	0	0	53.9947	0.363065	365	0.868715	11	36	41	14218	14218	10085	8854	28144	Vis6_Ethanol_FISH	low
metabat_cnzag_bins_checkm_out_tree_qa2.txt	3300031373.a.fna.fa_bins.4	NA	0	0	0	59.823	0.211507	236	0.858076	11	15	25	23625	23625	14100	8456	65421	Vis6_Ethanol_FISH	low
metabat_cnzag_bins_checkm_out_tree_qa2.txt	3300031373.a.fna.fa_bins.5	k__Bacteria;p__Bacteroidetes	5.63	0	0	40.6565	0.294242	299	0.904429	11	30	37	14862	14862	9808	7950	45892	Vis6_Ethanol_FISH	low
metabat_cnzag_bins_checkm_out_tree_qa2.txt	3300031373.a.fna.fa_bins.6	NA	12.5	0	0	39.91	0.413919	422	0.90639	11	56	68	10932	9478	7391	6085	27655	Vis6_Ethanol_FISH	low
metabat_cnzag_bins_checkm_out_tree_qa2.txt	3300031373.a.fna.fa_bins.7	k__Bacteria;p__Bacteroidetes;c__Flavobacteriia;o__Flavobacteriales	82.26	3.58	57.14	48.1001	1.93977	1863	0.940242	11	179	201	19073	17404	10836	9601	94841	Vis6_Ethanol_FISH	medium
metabat_cnzag_bins_checkm_out_tree_qa2.txt	3300031402.a.fna.fa_bins.1	k__Bacteria;p__Bacteroidetes;c__Flavobacteriia;o__Flavobacteriales	75.56	1.61	100	48.2942	1.75016	1730	0.941995	11	190	203	12560	12149	9211	8609	50867	Vis6_Ethanol_FISH	medium
metabat_cnzag_bins_checkm_out_tree_qa2.txt	3300031407.a.fna.fa_bins.1	k__Bacteria;p__Bacteroidetes;c__Flavobacteriia;o__Flavobacteriales	38.78	11.35	3.03	31.4825	1.45495	1631	0.882853	11	215	245	8145	7849	6767	5936	56667	Vis6_Ethanol_FISH	-
metabat_cnzag_bins_checkm_out_tree_qa2.txt	3300031407.a.fna.fa_bins.2	NA	4.17	0	0	39.636	0.213745	219	0.907371	11	26	27	11850	11850	8220	7916	29892	Vis6_Ethanol_FISH	low
metabat_cnzag_bins_checkm_out_tree_qa2.txt	3300031407.a.fna.fa_bins.3	k__Bacteria;p__Proteobacteria;c__Gammaproteobacteria;o__Alteromonadales_2;f__Pseudoalteromonadaceae;g__Pseudoalteromonas	12.7	0	0	39.4238	0.249757	270	0.878698	11	45	50	5761	5761	5550	4994	20566	Vis6_Ethanol_FISH	low
metabat_cnzag_bins_checkm_out_tree_qa2.txt	3300031407.a.fna.fa_bins.4	NA	0	0	0	55.4084	0.267152	194	0.89281	11	15	16	34775	34775	17810	16696	56186	Vis6_Ethanol_FISH	low
metabat_cnzag_bins_checkm_out_tree_qa2.txt	3300031429.a.fna.fa_bins.1	NA	0	0	0	41.0892	0.286941	307	0.932125	11	44	50	6625	6625	6521	5737	50048	Vis6_Ethanol_FISH	low
metabat_cnzag_bins_checkm_out_tree_qa2.txt	3300031429.a.fna.fa_bins.2	k__Bacteria;p__Bacteroidetes;c__Flavobacteriia;o__Flavobacteriales	84.81	5.38	76.92	48.3889	1.84287	1799	0.942856	11	191	206	14141	13574	9648	8912	75246	Vis6_Ethanol_FISH	low
metabat_cnzag_bins_checkm_out_tree_qa2.txt	3300031429.a.fna.fa_bins.3	k__Bacteria;p__Bacteroidetes;c__Flavobacteriia;o__Flavobacteriales;f__Flavobacteriaceae;g__Maribacter	7.37	0	0	38.7812	0.357439	356	0.916156	11	43	49	9634	9330	8312	7289	24360	Vis6_Ethanol_FISH	low
metabat_cnzag_bins_checkm_out_tree_qa2.txt	3300031429.a.fna.fa_bins.4	k__Bacteria;p__Proteobacteria;c__Alphaproteobacteria;o__Rickettsiales;f__Pelagibacteraceae	74.96	47.94	10.42	32.7689	2.87769	3236	0.92252	11	433	508	7733	7628	6645	5662	42645	Vis6_Ethanol_FISH	-
metabat_cnzag_bins_checkm_out_tree_qa2.txt	3300031429.a.fna.fa_bins.5	k__Bacteria;p__Proteobacteria;c__Gammaproteobacteria	12.07	0	0	39.3047	0.431728	479	0.890118	11	80	91	6392	5797	5396	4743	20388	Vis6_Ethanol_FISH	low
metabat_cnzag_bins_checkm_out_tree_qa2.txt	3300031429.a.fna.fa_bins.6	NA	0	0	0	39.206	0.212872	233	0.925194	11	31	35	8660	8549	6866	6080	19572	Vis6_Ethanol_FISH	low
metabat_cnzag_bins_checkm_out_tree_qa2.txt	3300031345.a.fna.fa_bins.1	k__Bacteria;p__Bacteroidetes;c__Flavobacteriia;o__Flavobacteriales	47.76	0	0	48.2607	1.05288	1131	0.938476	11	131	147	10080	9899	8037	7158	43375	Vis6_Unfixed_FISH	low
metabat_cnzag_bins_checkm_out_tree_qa2.txt	3300031345.a.fna.fa_bins.2	k__Bacteria;p__Proteobacteria;c__Gammaproteobacteria;o__Vibrionales;f__Vibrionaceae;g__Vibrio	1.72	0	0	44.2121	0.278895	266	0.867352	11	29	30	10316	10316	9617	9296	35836	Vis6_Unfixed_FISH	low
metabat_cnzag_bins_checkm_out_tree_qa2.txt	3300031345.a.fna.fa_bins.3	NA	0	0	0	33.8839	0.235849	254	0.923239	11	35	37	8360	8360	6738	6373	22375	Vis6_Unfixed_FISH	low
metabat_cnzag_bins_checkm_out_tree_qa2.txt	3300031347.a.fna.fa_bins.1	k__Bacteria;p__Bacteroidetes;c__Flavobacteriia;o__Flavobacteriales;f__Flavobacteriaceae	12.07	0	0	34.9827	0.446238	447	0.894536	11	30	34	21716	18632	14874	13120	53028	Vis6_Unfixed_FISH	low
metabat_cnzag_bins_checkm_out_tree_qa2.txt	3300031347.a.fna.fa_bins.2	k__Bacteria;p__Bacteroidetes;c__Flavobacteriia;o__Flavobacteriales	43.38	1.08	33.33	48.5082	0.857991	899	0.94309	11	113	135	9593	9131	7592	6347	34561	Vis6_Unfixed_FISH	low
metabat_cnzag_bins_checkm_out_tree_qa2.txt	3300031347.a.fna.fa_bins.3	k__Bacteria;p__Bacteroidetes;c__Bacteroidia;o__Bacteroidales	3.45	0	0	48.8823	0.431433	370	0.902664	11	44	51	13960	12942	9805	8455	33435	Vis6_Unfixed_FISH	low
metabat_cnzag_bins_checkm_out_tree_qa2.txt	3300031347.a.fna.fa_bins.4	k__Bacteria;p__Bacteroidetes;c__Flavobacteriia;o__Flavobacteriales;f__Flavobacteriaceae;g__Flavobacterium	54.8	17.43	0	30.7459	2.40079	2616	0.892263	11	310	363	9586	9458	7744	6611	50924	Vis6_Unfixed_FISH	-
metabat_cnzag_bins_checkm_out_tree_qa2.txt	3300031347.a.fna.fa_bins.5	NA	0	0	0	38.5621	0.214858	239	0.886944	11	50	59	4305	4179	4297	3640	12356	Vis6_Unfixed_FISH	low
metabat_cnzag_bins_checkm_out_tree_qa2.txt	3300031348.a.fna.fa_bins.1	NA	0	0	0	37.4077	0.303778	337	0.846924	11	58	64	6171	6171	5237	4745	13520	Vis6_Unfixed_FISH	low
metabat_cnzag_bins_checkm_out_tree_qa2.txt	3300031348.a.fna.fa_bins.2	NA	0	0	0	39.5502	0.206221	231	0.882442	11	44	49	5498	4824	4686	4207	11694	Vis6_Unfixed_FISH	low
metabat_cnzag_bins_checkm_out_tree_qa2.txt	3300031348.a.fna.fa_bins.3	k__Bacteria;p__Bacteroidetes;c__Flavobacteriia;o__Flavobacteriales	67.56	3.23	42.86	48.3047	1.53334	1573	0.947199	11	163	180	12701	11870	9407	8517	59968	Vis6_Unfixed_FISH	medium
metabat_cnzag_bins_checkm_out_tree_qa2.txt	3300031348.a.fna.fa_bins.4	k__Bacteria;p__Proteobacteria	52.82	21.9	8.11	30.4335	2.15144	2434	0.879414	11	330	384	7686	7537	6519	5600	46174	Vis6_Unfixed_FISH	-
metabat_cnzag_bins_checkm_out_tree_qa2.txt	3300031348.a.fna.fa_bins.5	k__Bacteria;p__Bacteroidetes;c__Flavobacteriia;o__Flavobacteriales;f__Flavobacteriaceae	18.97	0	0	41.3056	0.601739	615	0.91095	11	71	79	12754	12754	8475	7615	32867	Vis6_Unfixed_FISH	low
metabat_cnzag_bins_checkm_out_tree_qa2.txt	3300031348.a.fna.fa_bins.6	k__Bacteria;p__Bacteroidetes;c__Flavobacteriia;o__Flavobacteriales;f__Flavobacteriaceae;g__Gramella	13.79	0	0	36.9394	0.449132	501	0.905262	11	71	82	7300	7300	6325	5475	21601	Vis6_Unfixed_FISH	low
metabat_cnzag_bins_checkm_out_tree_qa2.txt	3300031349.a.fna.fa_bins.1	k__Bacteria;p__Bacteroidetes;c__Flavobacteriia;o__Flavobacteriales;f__Flavobacteriaceae	21.03	2.66	0	35.572	0.823132	885	0.892591	11	120	135	8642	8300	6859	6095	22708	Vis6_Unfixed_FISH	low
metabat_cnzag_bins_checkm_out_tree_qa2.txt	3300031349.a.fna.fa_bins.2	NA	0	0	0	39.0347	0.302606	337	0.86727	11	53	61	5614	5614	5709	4958	19972	Vis6_Unfixed_FISH	low
metabat_cnzag_bins_checkm_out_tree_qa2.txt	3300031349.a.fna.fa_bins.3	k__Bacteria;p__Bacteroidetes;c__Flavobacteriia;o__Flavobacteriales;f__Flavobacteriaceae;g__Flavobacterium	25.86	0	0	30.3923	0.866471	1031	0.890281	11	149	173	5675	5646	5815	5007	27087	Vis6_Unfixed_FISH	low
metabat_cnzag_bins_checkm_out_tree_qa2.txt	3300031440.a.fna.fa_bins.1	k__Bacteria;p__Bacteroidetes;c__Flavobacteriia;o__Flavobacteriales;f__Flavobacteriaceae;g__Gramella	18.97	0	0	36.8613	0.962648	996	0.895615	11	98	112	13015	13015	9822	8593	38533	Vis6_Unfixed_FISH	low
metabat_cnzag_bins_checkm_out_tree_qa2.txt	3300031440.a.fna.fa_bins.2	k__Bacteria;p__Bacteroidetes;c__Flavobacteriia;o__Flavobacteriales;f__Flavobacteriaceae;g__Flavobacterium	31.9	5.66	11.43	32.6618	1.2131	1279	0.9015	11	170	184	8811	8786	7135	6591	43477	Vis6_Unfixed_FISH	low
metabat_cnzag_bins_checkm_out_tree_qa2.txt	3300031267.a.fna.fa_bins.1	k__Bacteria;p__Proteobacteria;c__Alphaproteobacteria;o__Rhizobiales;f__Bradyrhizobiaceae;g__Bradyrhizobium	61.63	2.23	15	64.1111	4.68259	4603	0.861105	11	227	304	51668	46402	20628	15399	243194	Vis6_Unfixed_Neg	medium
metabat_cnzag_bins_checkm_out_tree_qa2.txt	3300031270.a.fna.fa_bins.1	k__Bacteria;p__Proteobacteria;c__Alphaproteobacteria;o__Rhizobiales;f__Bradyrhizobiaceae;g__Bradyrhizobium	93.1	57.05	26.36	63.7734	12.2683	12143	0.862801	11	660	847	43451	39167	18588	14481	344941	Vis6_Unfixed_Neg	-
metabat_cnzag_bins_checkm_out_tree_qa2.txt	3300031400.a.fna.fa_bins.1	k__Bacteria;p__Proteobacteria;c__Alphaproteobacteria;o__Rhizobiales;f__Bradyrhizobiaceae;g__Bradyrhizobium;s__Bradyrhizobium_japonicum	87.93	63.02	14.71	63.1334	10.6138	10545	0.865934	11	508	704	48482	44640	20893	15072	250987	Vis6_Ethanol_Neg	-
metabat_cnzag_bins_checkm_out_tree_qa2.txt	3300031442.a.fna.fa_bins.1	NA	0	0	0	58.8883	0.207321	235	0.875719	11	14	16	104274	104274	14808	12956	104274	Vis6_Ethanol_Neg	low
metabat_cnzag_bins_checkm_out_tree_qa2.txt	3300031268.a.fna.fa_bins.1	k__Bacteria;p__Proteobacteria;c__Alphaproteobacteria;o__Rhizobiales;f__Bradyrhizobiaceae;g__Bradyrhizobium	72.41	17.24	11.11	63.5472	4.66841	4677	0.863218	11	279	344	29116	28467	16732	13567	101136	CF_Unfixed_Neg	-
metabat_cnzag_bins_checkm_out_tree_qa2.txt	3300031443.a.fna.fa_bins.1	k__Bacteria;p__Proteobacteria;c__Alphaproteobacteria;o__Rhizobiales;f__Bradyrhizobiaceae;g__Bradyrhizobium	44.83	0	0	64.0941	3.45161	3333	0.864832	11	144	191	53392	48493	23969	18067	170846	CF_Unfixed_Neg	low
metabat_cnzag_bins_checkm_out_tree_qa2.txt	3300031271.a.fna.fa_bins.1	k__Bacteria;p__Proteobacteria;c__Alphaproteobacteria;o__Rhizobiales;f__Bradyrhizobiaceae;g__Bradyrhizobium	15.52	8.62	10	63.712	2.06308	2069	0.858892	11	157	198	28330	24512	13140	10415	171402	CF_Ethanol_Neg	low
