# Supplementary material for: A pipeline for targeted metagenomics of environmental bacteria
Source: Microbiome. 2020 Feb 15;8:21. doi: 10.1186/s40168-020-0790-7 (PMC7024552; doi:10.1186/s40168-020-0790-7)
Supplement: Supplementary file 16 — Additional file 15: Table S2. Sample description and statistics of Anvi'o binned assemblies from sorted Vis6 samples. Marker_lineage, completeness, contamination and strain heterogeneity were assessed with checkM. [file 40168_2020_790_MOESM15_ESM.xlsx]

## Sheet: Sheet1
Table S2: Sample description and statistics of Anvi'o binned assemblies from sorted Vis6 samples. Marker_lineage, completeness, contamination and strain heterogeneity were assessed with checkM.
Classified as Vis6	TAXON_OID	IMG_TAXON_OID	Sorted based on probe	marker_lineage	Completeness	Contamination	Strain_heterogeneity	spid	LibraryID	IsoOrEnvOrBulk	JGI_SPECIES_CODE	poolID	assembly_avail_rqc	Number.of.Cells	Geographic.Location	Latitude	Longitude	Sampling.date	Sample.type	Sample.specification	sorting.based.on	Sample.treatment	MIMAG_quality
yes	IMG_266_1-contigs	3300031266	Vis6_814_871	k__Bacteria	65.57	2.15	100	1193957	CNYTP	Env	Ga0321421	CNZAG	Available	500	Helgoland-Kabeltonne	54,184167	7,9	9/20/17	environmental	Vis6-sorts	FISH-positive	Ethanol	medium
no	IMG_266_2-contigs	3300031266	Vis6_814_871	k__Bacteria	20.4	4.31	0	1193957	CNYTP	Env	Ga0321421	CNZAG	Available	500	Helgoland-Kabeltonne	54,184167	7,9	9/20/17	environmental	Vis6-sorts	FISH-positive	Ethanol	low
no	IMG_266_3-contigs	3300031266	Vis6_814_871	s__algicola	54.8	30.29	2.63	1193957	CNYTP	Env	Ga0321421	CNZAG	Available	500	Helgoland-Kabeltonne	54,184167	7,9	9/20/17	environmental	Vis6-sorts	FISH-positive	Ethanol	-
yes	IMG_345_1-contigs	3300031345	Vis6_814_871	k__Bacteria	49.16	0	0	1193944	CNYST	Env	Ga0321408	CNZAG	Available	500	Helgoland-Kabeltonne	54,184167	7,9	9/20/17	environmental	Vis6-sorts	FISH-positive	Unfixed	low
no	IMG_345_2-contigs	3300031345	Vis6_814_871	k__Bacteria	4.78	0	0	1193944	CNYST	Env	Ga0321408	CNZAG	Available	500	Helgoland-Kabeltonne	54,184167	7,9	9/20/17	environmental	Vis6-sorts	FISH-positive	Unfixed	low
no	IMG_345_3-contigs	3300031345	Vis6_814_871	g__Vibrio	23.01	3.32	0	1193944	CNYST	Env	Ga0321408	CNZAG	Available	500	Helgoland-Kabeltonne	54,184167	7,9	9/20/17	environmental	Vis6-sorts	FISH-positive	Unfixed	low
yes	IMG_347_1-contigs	3300031347	Vis6_814_871	k__Bacteria	42.97	0.54	100	1193941	CNYSO	Env	Ga0321405	CNZAG	Available	500	Helgoland-Kabeltonne	54,184167	7,9	9/20/17	environmental	Vis6-sorts	FISH-positive	Unfixed	low
no	IMG_347_2-contigs	3300031347	Vis6_814_871	f__Flavobacteriaceae	26.46	0.71	0	1193941	CNYSO	Env	Ga0321405	CNZAG	Available	500	Helgoland-Kabeltonne	54,184167	7,9	9/20/17	environmental	Vis6-sorts	FISH-positive	Unfixed	low
no	IMG_347_3-contigs	3300031347	Vis6_814_871	k__Bacteria	51.73	21.27	0	1193941	CNYSO	Env	Ga0321405	CNZAG	Available	500	Helgoland-Kabeltonne	54,184167	7,9	9/20/17	environmental	Vis6-sorts	FISH-positive	Unfixed	-
yes	IMG_348_1-contigs	3300031348	Vis6_814_871	k__Bacteria	65.95	1.08	100	1193942	CNYSP	Env	Ga0321406	CNZAG	Available	500	Helgoland-Kabeltonne	54,184167	7,9	9/20/17	environmental	Vis6-sorts	FISH-positive	Unfixed	medium
no	IMG_348_2-contigs	3300031348	Vis6_814_871	k__Bacteria	21	0	0	1193942	CNYSP	Env	Ga0321406	CNZAG	Available	500	Helgoland-Kabeltonne	54,184167	7,9	9/20/17	environmental	Vis6-sorts	FISH-positive	Unfixed	low
no	IMG_348_3-contigs	3300031348	Vis6_814_871	c__Betaproteobacteria	43.01	16.74	1.67	1193942	CNYSP	Env	Ga0321406	CNZAG	Available	500	Helgoland-Kabeltonne	54,184167	7,9	9/20/17	environmental	Vis6-sorts	FISH-positive	Unfixed	-
no	IMG_348_4-contigs	3300031348	Vis6_814_871	k__Bacteria	39.66	13.79	18.18	1193942	CNYSP	Env	Ga0321406	CNZAG	Available	500	Helgoland-Kabeltonne	54,184167	7,9	9/20/17	environmental	Vis6-sorts	FISH-positive	Unfixed	-
yes	IMG_349_1-contigs	3300031349	Vis6_814_871	k__Bacteria	61.48	1.08	75	1193943	CNYSS	Env	Ga0321407	CNZAG	Available	500	Helgoland-Kabeltonne	54,184167	7,9	9/20/17	environmental	Vis6-sorts	FISH-positive	Unfixed	medium
no	IMG_349_2-contigs	3300031349	Vis6_814_871	k__Bacteria	8.62	0	0	1193943	CNYSS	Env	Ga0321407	CNZAG	Available	500	Helgoland-Kabeltonne	54,184167	7,9	9/20/17	environmental	Vis6-sorts	FISH-positive	Unfixed	low
no	IMG_349_3-contigs	3300031349	Vis6_814_871	k__Bacteria	28.06	3.45	0	1193943	CNYSS	Env	Ga0321407	CNZAG	Available	500	Helgoland-Kabeltonne	54,184167	7,9	9/20/17	environmental	Vis6-sorts	FISH-positive	Unfixed	low
no	IMG_349_4-contigs	3300031349	Vis6_814_871	s__algicola	23.18	4.83	0	1193943	CNYSS	Env	Ga0321407	CNZAG	Available	500	Helgoland-Kabeltonne	54,184167	7,9	9/20/17	environmental	Vis6-sorts	FISH-positive	Unfixed	low
no	IMG_349_5-contigs	3300031349	Vis6_814_871	root	4.17	0	0	1193943	CNYSS	Env	Ga0321407	CNZAG	Available	500	Helgoland-Kabeltonne	54,184167	7,9	9/20/17	environmental	Vis6-sorts	FISH-positive	Unfixed	low
yes	IMG_373_1-contigs	3300031373	Vis6_814_871	k__Bacteria	82.26	2.96	87.5	1193956	CNYTO	Env	Ga0321420	CNZAG	Available	500	Helgoland-Kabeltonne	54,184167	7,9	9/20/17	environmental	Vis6-sorts	FISH-positive	Ethanol	medium
no	IMG_373_2-contigs	3300031373	Vis6_814_871	k__Bacteria	15.52	0	0	1193956	CNYTO	Env	Ga0321420	CNZAG	Available	500	Helgoland-Kabeltonne	54,184167	7,9	9/20/17	environmental	Vis6-sorts	FISH-positive	Ethanol	low
no	IMG_373_3-contigs	3300031373	Vis6_814_871	k__Bacteria	61.05	22.9	0	1193956	CNYTO	Env	Ga0321420	CNZAG	Available	500	Helgoland-Kabeltonne	54,184167	7,9	9/20/17	environmental	Vis6-sorts	FISH-positive	Ethanol	-
yes	IMG_402_1-contigs	3300031429	Vis6_814_871	k__Bacteria	75.67	1.61	100	1193955	CNYTN	Env	Ga0321419	CNZAG	Available	500	Helgoland-Kabeltonne	54,184167	7,9	9/20/17	environmental	Vis6-sorts	FISH-positive	Ethanol	medium
no	IMG_402_2-contigs	3300031429	Vis6_814_871	root	9.38	4.17	0	1193955	CNYTN	Env	Ga0321419	CNZAG	Available	500	Helgoland-Kabeltonne	54,184167	7,9	9/20/17	environmental	Vis6-sorts	FISH-positive	Ethanol	low
yes	IMG_407_1-contigs	3300031407	Vis6_814_871	k__Bacteria	87.63	0.81	100	1193954	CNYTH	Env	Ga0321418	CNZAG	Available	500	Helgoland-Kabeltonne	54,184167	7,9	9/20/17	environmental	Vis6-sorts	FISH-positive	Ethanol	medium
no	IMG_407_2-contigs	3300031407	Vis6_814_871	k__Bacteria	10.34	0	0	1193954	CNYTH	Env	Ga0321418	CNZAG	Available	500	Helgoland-Kabeltonne	54,184167	7,9	9/20/17	environmental	Vis6-sorts	FISH-positive	Ethanol	low
no	IMG_407_3-contigs	3300031407	Vis6_814_871	c__Gammaproteobacteria	6.84	0.14	20	1193954	CNYTH	Env	Ga0321418	CNZAG	Available	500	Helgoland-Kabeltonne	54,184167	7,9	9/20/17	environmental	Vis6-sorts	FISH-positive	Ethanol	low
no	IMG_407_4-contigs	3300031407	Vis6_814_871	k__Bacteria	44.09	13.37	0	1193954	CNYTH	Env	Ga0321418	CNZAG	Available	500	Helgoland-Kabeltonne	54,184167	7,9	9/20/17	environmental	Vis6-sorts	FISH-positive	Ethanol	-
yes	IMG_429_1-contigs	3300031429	Vis6_814_871	k__Bacteria	81.59	3.23	100	1193953	CNYTG	Env	Ga0321417	CNZAG	Available	500	Helgoland-Kabeltonne	54,184167	7,9	9/20/17	environmental	Vis6-sorts	FISH-positive	Ethanol	medium
no	IMG_429_2-contigs	3300031429	Vis6_814_871	f__Flavobacteriaceae	22.26	1.68	14.29	1193953	CNYTG	Env	Ga0321417	CNZAG	Available	500	Helgoland-Kabeltonne	54,184167	7,9	9/20/17	environmental	Vis6-sorts	FISH-positive	Ethanol	low
no	IMG_429_3-contigs	3300031429	Vis6_814_871	k__Bacteria	77.96	77.44	3.88	1193953	CNYTG	Env	Ga0321417	CNZAG	Available	500	Helgoland-Kabeltonne	54,184167	7,9	9/20/17	environmental	Vis6-sorts	FISH-positive	Ethanol	-
yes	IMG_440_1-contigs	3300031440	Vis6_814_871	k__Bacteria	45.5	0	0	1193945	CNYSU	Env	Ga0321409	CNZAG	Available	500	Helgoland-Kabeltonne	54,184167	7,9	9/20/17	environmental	Vis6-sorts	FISH-positive	Unfixed	low
no	IMG_440_2-contigs	3300031440	Vis6_814_871	f__Flavobacteriaceae	40.91	10.07	15.25	1193945	CNYSU	Env	Ga0321409	CNZAG	Available	500	Helgoland-Kabeltonne	54,184167	7,9	9/20/17	environmental	Vis6-sorts	FISH-positive	Unfixed	-
no	IMG_440_3-contigs	3300031440	Vis6_814_871	s__algicola	23.85	4.2	7.14	1193945	CNYSU	Env	Ga0321409	CNZAG	Available	500	Helgoland-Kabeltonne	54,184167	7,9	9/20/17	environmental	Vis6-sorts	FISH-positive	Unfixed	low
no	IMG_440_4-contigs	3300031440	Vis6_814_871	f__Flavobacteriaceae	5.69	0	0	1193945	CNYSU	Env	Ga0321409	CNZAG	Available	500	Helgoland-Kabeltonne	54,184167	7,9	9/20/17	environmental	Vis6-sorts	FISH-positive	Unfixed	low
