# Supplementary material for: A pipeline for targeted metagenomics of environmental bacteria
Source: Microbiome. 2020 Feb 15;8:21. doi: 10.1186/s40168-020-0790-7 (PMC7024552; doi:10.1186/s40168-020-0790-7)
Supplement: Supplementary file 18 — Additional file 17: Table S4. Draft genomes of Vis6 from Vis6-targeted sorts and from bulk metagenome. [file 40168_2020_790_MOESM17_ESM.xlsx]

## Sheet: Sheet1
Table S4: Draft genomes of Vis6 from Vis6-targeted sorts and from bulk metagenome.
IMG_ID	3300031345	3300031347	3300031348	3300031349	3300031440	3300031373	3300031266	3300031402	3311131407	3300031429	3300031230
Bin Nr	1	1	1	1	1	1	1	1	1	1	28
Sample treatment	Unfixed	Unfixed	Unfixed	Unfixed	Unfixed	Ethanol fixed	Ethanol fixed	Ethanol fixed	Ethanol fixed	Ethanol fixed	Unfixed
Sorting	Vis6-targeted	Vis6-targeted	Vis6-targeted	Vis6-targeted	Vis6-targeted	Vis6-targeted	Vis6-targeted	Vis6-targeted	Vis6-targeted	Vis6-targeted	bulk metagenome
MIMAG quality	low	low	medium	medium	low	medium	medium	medium	medium	medium	medium
Completeness (%)	49.16	42.97	65.95	61.48	45.5	82.26	65.57	75.67	87.63	81.59	86.38
Contamination (%)	0	0.54	1.08	1.08	0	2.96	2.15	1.61	0.81	3.23	2.82
GC content	47.71	47.79	47.61	47.64	47.45	47.18	47.37	47.38	47.52	47.56	48.2329
Bin size (Mbp)	1.115	0.888577	1.65121	1.38348	1.11741	2.10455	1.69132	1.92691	2.17834	1.9471	1.53914
Estimated genome size (%)	2.26755	2.0679	2.50373	2.25029	2.45585	2.55841	2.57941	2.54646	2.48583	2.38644	2.11207
Number of tRNA	16	10	25	27	12	31	27	26	34	29	26
Number of different tRNA	12	8	16	17	9	18	15	15	18	18	17
N50 of scaffold (kbp)	9.439	9.027	12.265	12.31	10.835	19.073	11.252	12.434	26.34	15.854	13.148
N50 of contig (kbp)	8.922	8.782	11.765	11.825	10.835	17.404	10.433	11.573	22.724	14.141	13.148
Largest scaffold (kbp)	43.375	34.561	59.968	40.354	46.716	94.841	70.925	50.867	166.108	75.246	66.017
Largest contig (kbp)	43.375	34.561	58.909	40.354	46.716	87.474	47.786	50.867	165.547	59.39	66.017
Number of scaffolds	147	121	180	150	135	194	194	214	146	192	167
Number of contigs	169	140	199	170	148	219	205	227	163	207	167
16S rRNA genes & classification	1: Vis6	1: F.ponti	0	1: not classified	1: Vis6	2: Vis6, not classified	2: Vis6, F. ponti	0	2: Vis6, F. ponti	1: Vis6	0
