# Supplementary material for: A pipeline for targeted metagenomics of environmental bacteria
Source: Microbiome. 2020 Feb 15;8:21. doi: 10.1186/s40168-020-0790-7 (PMC7024552; doi:10.1186/s40168-020-0790-7)
Supplement: Supplementary file 19 — Additional file 18: Table S5. 16S rRNA gene sequences of sorted Vis6 assemblies, binned with Anvi'o and retrieved with ssu_finder (checkM). The closest relative in the 16S rRNA tree was analysed by adding the sequences into the Vis6 consensus tree. [file 40168_2020_790_MOESM18_ESM.xlsx]

## Sheet: Tabelle1
Table S5: 16S rRNA gene sequences of sorted Vis6 assemblies, binned with Anvi'o and retrieved with ssu_finder (checkM). The closest relative in the 16S rRNA tree was analysed by adding the sequences into the Vis6 consensus tree.
Bin Id	Seq. Id	HMM	i-Evalue	Start hit	End hit	16S/18S gene length	Rev. Complement	Sequence length	closest relative in 16S rRNA tree
IMG_266_1-contigs	3300031266_a_Ga0321421_10126	bacteria	0	4843	6362	1519	True	10779	Flavobacterium ponti
IMG_266_1-contigs	3300031266_a_Ga0321421_10452	bacteria	0	12	1441	1429	False	4644	Vis6_clusterC
IMG_266_2-contigs	3300031266_a_Ga0321421_10101	bacteria	0	5949	7491	1542	True	12214	Brownia rhizoecola
IMG_266_3-contigs	3300031266_a_Ga0321421_10352	bacteria	0	697	2182	1485	False	5658	Brownia rhizoecola
IMG_345_1-contigs	3300031345_a_Ga0321408_1343	bacteria	0	2	1372	1370	False	3991	Vis6_clusterC
IMG_345_2-contigs	3300031345_a_Ga0321408_1255	bacteria	0	12	1527	1515	False	5098	Flavobacterium ponti
IMG_345_3-contigs	3300031345_a_Ga0321408_1135	bacteria	0	4060	5531	1471	False	8373	Brownia rhizoecola
IMG_345_3-contigs	3300031345_a_Ga0321408_1097	bacteria	0	5930	7489	1559	False	10629	Schleiferia thermophila
IMG_347_1-contigs	3300031347_a_Ga0321405_1301	bacteria	0	3558	5077	1519	True	5492	Flavobacterium ponti
IMG_347_2-contigs	3300031347_a_Ga0321405_1462	bacteria	0	50	1609	1559	False	3936	Cryomorpha ignava
IMG_347_3-contigs	3300031347_a_Ga0321405_1008	bacteria	9e-129	32	523	491	False	35302	NA
unbinned	3300031347_a_Ga0321405_1737	bacteria	0	1	1392	1391	True	2303	Vis6_clusterB
IMG_348_2-contigs	3300031348_a_Ga0321406_10069	bacteria	0	9920	11439	1519	True	15603	Flavobacterium ponti
IMG_348_2-contigs	3300031348_a_Ga0321406_10403	bacteria	0	711	2188	1477	False	5394	Brownia rhizoecola
IMG_348_3-contigs	3300031348_a_Ga0321406_10493	bacteria	0	260	1806	1546	False	4632	Schleiferia thermophila
IMG_348_3-contigs	3300031348_a_Ga0321406_10407	bacteria	6.8e-182	4685	5366	681	True	5366	NA
IMG_348_3-contigs	3300031348_a_Ga0321406_10662	bacteria	5.4e-30	8	139	131	True	3552	NA
IMG_348_3-contigs	3300031348_a_Ga0321406_10416	bacteria	0	3503	4983	1480	True	5265	Brownia rhizoecola
IMG_348_3-contigs	3300031348_a_Ga0321406_10407-#2	bacteria	8.2e-182	1	682	681	False	5366	NA
IMG_348_4-contigs	3300031348_a_Ga0321406_10090	bacteria	0	5224	6765	1541	True	13887	Brownia rhizoecola
IMG_348_4-contigs	3300031348_a_Ga0321406_10324	bacteria	0	605	2144	1539	True	6527	Schleiferia thermophila
unbinned	3300031348_a_Ga0321406_10974	bacteria	0	226	1746	1520	False	2460	Olleya marilimosa
IMG_349_1-contigs	3300031349_a_Ga0321407_1028	bacteria	5.3e-263	1	1017	1016	False	18749	NA
IMG_349_2-contigs	3300031349_a_Ga0321407_1300	bacteria	0	3226	4704	1478	True	4859	Brownia rhizoecola
IMG_349_2-contigs	3300031349_a_Ga0321407_1022	bacteria	0	8636	10155	1519	False	20169	Flavobacterium ponti
IMG_349_2-contigs	3300031349_a_Ga0321407_1366	bacteria	2.2e-123	3685	4153	468	True	4153	NA
IMG_349_4-contigs	3300031349_a_Ga0321407_1146	bacteria	0	1	1411	1410	False	8577	Schleiferia thermophila
unbinned	3300031349_a_Ga0321407_1614	bacteria	0	803	2351	1548	False	2392	Brownia rhizoecola
IMG_373_1-contigs	3300031373_a_Ga0321420_1438	bacteria	0	1	1425	1424	False	4658	Vis6_clusterC
IMG_373_1-contigs	3300031373_a_Ga0321420_1450	bacteria	1.9e-42	2	217	215	False	4506	NA
IMG_373_2-contigs	3300031373_a_Ga0321420_1302	bacteria	0	1	1366	1365	False	6514	Schleiferia thermophila
IMG_373_3-contigs	3300031373_a_Ga0321420_1024	bacteria	0	22974	24531	1557	True	27990	Brownia rhizoecola
IMG_373_3-contigs	3300031373_a_Ga0321420_1245	bacteria	0	5956	7446	1490	True	7717	Schleiferia thermophila
IMG_373_3-contigs	3300031373_a_Ga0321420_1002	bacteria	0	4238	5733	1495	False	76868	Schleiferia thermophila
IMG_402_2-contigs	3300031402_a_Ga0321419_1044	bacteria	0	83	1622	1539	False	13096	Schleiferia thermophila
IMG_407_1-contigs	3300031407_a_Ga0321418_1104	bacteria	0	7705	9224	1519	False	12014	Flavobacterium ponti
IMG_407_1-contigs	3300031407_a_Ga0321418_1016	bacteria	0	36100	37625	1525	False	40337	Vis6_clusterC
IMG_407_3-contigs	3300031407_a_Ga0321418_1062	bacteria	0	6361	7903	1542	True	16823	Brownia rhizoecola
IMG_407_3-contigs	3300031407_a_Ga0321418_1281	bacteria	0	3861	5338	1477	False	5394	Brownia rhizoecola
IMG_429_1-contigs	3300031429_a_Ga0321417_11042	bacteria	0	451	1976	1525	True	2590	Vis6_clusterC
IMG_429_2-contigs	3300031429_a_Ga0321417_10859	bacteria	6.8e-12	3058	3186	128	True	3187	NA
IMG_429_3-contigs	3300031429_a_Ga0321417_10437	bacteria	0	1603	3076	1473	True	5864	Brownia rhizoecola
IMG_429_3-contigs	3300031429_a_Ga0321417_10469	bacteria	0	2782	4328	1546	True	5569	Sungkyunkwania multivorans
IMG_429_3-contigs	3300031429_a_Ga0321417_10036	bacteria	0	8951	10470	1519	False	21079	Flavobacterium ponti
IMG_429_3-contigs	3300031429_a_Ga0321417_10084	bacteria	1.5e-174	1	714	713	True	14869	NA
IMG_440_1-contigs	3300031440_a_Ga0321409_1008	bacteria	0	20062	21587	1525	True	34279	Vis6_clusterC
IMG_440_2-contigs	3300031440_a_Ga0321409_1153	bacteria	0	3831	5380	1549	True	8403	Brownia rhizoecola
IMG_440_2-contigs	3300031440_a_Ga0321409_1067	bacteria	2.5e-59	2	273	271	False	13496	NA
IMG_440_4-contigs	3300031440_a_Ga0321409_1108	bacteria	3.1e-215	9722	10638	916	False	10638	NA
IMG_440_4-contigs	3300031440_a_Ga0321409_1096	bacteria	9.2e-64	1	298	297	False	11259	NA
