# Supplementary material for: A pipeline for targeted metagenomics of environmental bacteria
Source: Microbiome. 2020 Feb 15;8:21. doi: 10.1186/s40168-020-0790-7 (PMC7024552; doi:10.1186/s40168-020-0790-7)
Supplement: Supplementary file 21 — Additional file 20: Table S6. 16S rRNA gene sequences from the whole community shotgun metagenome, retrieved with ssu_finder (checkM), with SILVA classification. Three sequences in bold are assigned to the Vis6 cluster. [file 40168_2020_790_MOESM20_ESM.xlsx]

## Sheet: Sheet1
Table S6: 16S rRNA gene sequences from the whole community shotgun metagenome, retrieved with ssu_finder (checkM), with SILVA classification. Three sequences in bold are assigned to the Vis6 cluster.
Bin Id	Seq. Id	HMM	i-Evalue	Start hit	End hit	16S/18S gene length	Rev. Complement	Sequence length	arb classification
3300031230_bulk_metagenome.fa_bins.13	3300031230.a:Ga0321427_10000550	bacteria	3.5e-30	7	208	201	TRUE	23079	Bacteria/Proteobacteria/Gammaproteobacteria/Alteromonadales_1/Moritellaceae/Paramoritella
3300031230_bulk_metagenome.fa_bins.14	3300031230.a:Ga0321427_10000983	bacteria	0	1719	3252	1533	FALSE	16846	Bacteria/Bacteroidetes/Bacteroidia/Flavobacteriales/Flavobacteriaceae_1/NS5 marine group
3300031230_bulk_metagenome.fa_bins.14	3300031230.a:Ga0321427_10000428	bacteria	0	18727	20260	1533	TRUE	26739	Bacteria/Actinobacteria/Acidimicrobiia/Actinomarinales/Actinomarinaceae_Candidatus Actinomarina
3300031230_bulk_metagenome.fa_bins.15	3300031230.a:Ga0321427_10000563	bacteria	0	661	2134	1473	FALSE	22940	Bacteria/Proteobacteria/Alphaproteobacteria/Rhodobacterales_Rhodobacteraceae_1/Amylibacter
3300031230_bulk_metagenome.fa_bins.17	3300031230.a:Ga0321427_10003788	bacteria	1.4e-290	6465	7577	1112	FALSE	7577	Bacteria/Proteobacteria/Gammaproteobacteria/Oceanospirillales_Pseudohongiellaceae/Pseudohongiella
3300031230_bulk_metagenome.fa_bins.21	3300031230.a:Ga0321427_10001907	bacteria	6.6e-27	1	168	167	TRUE	11332	Bacteria/Proteobacteria/Gammaproteobacteria/SAR86 clade
3300031230_bulk_metagenome.fa_bins.30	3300031230.a:Ga0321427_10001407	bacteria	8e-93	13174	13595	421	FALSE	13596	Bacteria/Proteobacteria/Gammaproteobacteria/Oceanospirillales_Saccharospirillaceae
3300031230_bulk_metagenome.fa_bins.34	3300031230.a:Ga0321427_10000612	bacteria	0	4318	5880	1562	TRUE	21913	Bacteria/Marinimicrobia (SAR406 clade)
3300031230_bulk_metagenome.fa_bins.36	3300031230.a:Ga0321427_10001166	bacteria	0	27	1386	1359	FALSE	15260	Bacteria/Marinimicrobia (SAR406 clade)
3300031230_bulk_metagenome.fa_bins.58	3300031230.a:Ga0321427_10002858	archaea	0	701	2171	1470	FALSE	8959	Archaea/Euryarchaeota/Thermoplasmata/Marine Group II
3300031230_bulk_metagenome.fa_bins.64	3300031230.a:Ga0321427_10000831	bacteria	4.5e-11	21	89	68	TRUE	18266	Bacteria/Proteobacteria/Gammaproteobacteria
unbinned	3300031230.a:Ga0321427_10553304	archaea	1.9e-57	1	398	397	FALSE	400	Bacteria/Bacteroidetes/Bacteroidia/Flavobacteriales/Flavobacteriaceae_1/Confluentibacter
unbinned	3300031230.a:Ga0321427_10648741	bacteria	1.9e-88	2	364	362	FALSE	365	Bacteria/Proteobacteria/Alphaproteobacteria/Sphingomonadales_Sphingomonadaceae/Erythrobacter_1
unbinned	3300031230.a:Ga0321427_10107663	bacteria	5.8e-40	2	211	209	FALSE	1073	Bacteria/Bacteroidetes/Bacteroidia/Flavobacteriales/Flavobacteriaceae_1/Polaribacter 1
unbinned	3300031230.a:Ga0321427_10068659	bacteria	0	149	1397	1248	TRUE	1397	Bacteria/Proteobacteria/Alphaproteobacteria/Rhodospirillales/AEGEAN-169 marine group
unbinned	3300031230.a:Ga0321427_10847051	bacteria	3.8e-65	2	289	287	FALSE	311	Bacteria/Proteobacteria/Gammaproteobacteria/Alteromonadales_Marinobacteraceae_Marinobacter
unbinned	3300031230.a:Ga0321427_10743657	archaea	2e-39	1	336	335	FALSE	337	Bacteria/Verrucomicrobia_Verrucomicrobiae/Verrucomicrobiales/DEV007
unbinned	3300031230.a:Ga0321427_10033722	bacteria	0	1	1230	1229	FALSE	2111	Bacteria/Proteobacteria/Gammaproteobacteria/Alteromonadales_2/Colwelliaceae/Colwellia_1
unbinned	3300031230.a:Ga0321427_10215439	bacteria	1e-77	1	373	372	TRUE	706	Bacteria/Proteobacteria/Gammaproteobacteria/Alteromonadales_2/Alteromonadaceae_1
unbinned	3300031230.a:Ga0321427_10432534	bacteria	2.7e-65	111	460	349	FALSE	460	Bacteria/Proteobacteria/Gammaproteobacteria/Alteromonadales_2/Idiomarinaceae/Idiomarina
unbinned	3300031230.a:Ga0321427_11013605	bacteria	1.2e-35	34	287	253	FALSE	287	Bacteria/Proteobacteria/Gammaproteobacteria/Vibrionales_Vibrionaceae/Vibrio_2
unbinned	3300031230.a:Ga0321427_10764252	bacteria	2.2e-89	3	330	327	FALSE	331	Bacteria/Planctomycetes/OM190
unbinned	3300031230.a:Ga0321427_10950079	bacteria	7.8e-43	1	291	290	FALSE	292	Bacteria/Bacteroidetes/Bacteroidia/Flavobacteriales/Flavobacteriaceae_1/NS5 marine group
unbinned	3300031230.a:Ga0321427_10207399	bacteria	4.1e-182	2	672	670	FALSE	723	Bacteria/Proteobacteria/Gammaproteobacteria/Alteromonadales_1/Moritellaceae/Moritella
unbinned	3300031230.a:Ga0321427_11008291	bacteria	9.7e-67	1	288	287	FALSE	288	Bacteria/Proteobacteria_Deltaproteobacteria/Desulfobacterales_Desulfobulbaceae/uncultured
unbinned	3300031230.a:Ga0321427_10060491	bacteria	0	2	1400	1398	TRUE	1504	Bacteria/Epsilonbacteraeota/Campylobacteria/Campylobacterales/Arcobacteraceae_Arcobacter
unbinned	3300031230.a:Ga0321427_10467617	bacteria	7.1e-112	5	438	433	FALSE	440	Bacteria/Proteobacteria/Alphaproteobacteria/Rhodospirillales/uncultured
unbinned	3300031230.a:Ga0321427_10363673	bacteria	1.9e-134	27	511	484	FALSE	511	Bacteria/Proteobacteria/Gammaproteobacteria/Alteromonadales_2/Colwelliaceae/Colwellia_1
unbinned	3300031230.a:Ga0321427_10891054	bacteria	1.9e-06	203	297	94	TRUE	302	Bacteria/Proteobacteria/Gammaproteobacteria/SAR86 clade
unbinned	3300031230.a:Ga0321427_10361358	bacteria	4.4e-117	10	510	500	FALSE	513	Bacteria/Proteobacteria/Gammaproteobacteria/Alteromonadales_Shewanellaceae/Shewanella
unbinned	3300031230.a:Ga0321427_10176503	bacteria	2.9e-37	1	311	310	FALSE	798	Bacteria/Bacteroidetes/Bacteroidia/Sphingobacteriales/Lentimicrobiaceae
unbinned	3300031230.a:Ga0321427_10696667	bacteria	2.3e-86	2	348	346	FALSE	350	Bacteria/Actinobacteria/Acidimicrobiia/Microtrichales/Ilumatobacteraceae/Ilumatobacter
unbinned	3300031230.a:Ga0321427_10433286	bacteria	3.1e-55	167	460	293	FALSE	460	Bacteria/Proteobacteria/Alphaproteobacteria/SAR11 clade/Clade II
unbinned	3300031230.a:Ga0321427_10729915	archaea	5.5e-59	2	340	338	TRUE	340	Bacteria/Bacteroidetes/Bacteroidia/Flavobacteriales/NS9 marine group
unbinned	3300031230.a:Ga0321427_10494567	bacteria	1.7e-102	13	423	410	FALSE	426	Bacteria/Tenericutes_Mollicutes/Anaeroplasmatales_Anaeroplasmataceae_Anaeroplasma
unbinned	3300031230.a:Ga0321427_10028748	bacteria	0	356	1885	1529	TRUE	2311	Bacteria/Proteobacteria/Gammaproteobacteria/Ectothiorhodospirales_Ectothiorhodospiraceae_1/uncultured
unbinned	3300031230.a:Ga0321427_10058974	bacteria	6.4e-248	1	992	991	TRUE	1526	Bacteria/Proteobacteria/Gammaproteobacteria/Alteromonadales_1/Moritellaceae/Moritella
unbinned	3300031230.a:Ga0321427_10043040	bacteria	0	1	1184	1183	TRUE	1832	Bacteria/Proteobacteria/Gammaproteobacteria/Cellvibrionales/Halieaceae/OM60(NOR5) clade
unbinned	3300031230.a:Ga0321427_11083920	bacteria	8.5e-65	2	280	278	FALSE	283	Bacteria/Proteobacteria/Alphaproteobacteria/uncultured
unbinned	3300031230.a:Ga0321427_10043957	bacteria	1.3e-112	1	444	443	FALSE	1811	Bacteria/Proteobacteria/Gammaproteobacteria/Cellvibrionales/Porticoccaceae/SAR92 clade
unbinned	3300031230.a:Ga0321427_10860815	bacteria	3.8e-67	1	304	303	FALSE	308	Bacteria/Bacteroidetes/Bacteroidia/Flavobacteriales/Cryomorphaceae_3/uncultured
unbinned	3300031230.a:Ga0321427_11165367	bacteria	4.1e-21	122	279	157	TRUE	279	Bacteria/Proteobacteria/Alphaproteobacteria/Rhodobacterales_Rhodobacteraceae_1/uncultured
unbinned	3300031230.a:Ga0321427_10247949	bacteria	1.1e-165	1	647	646	TRUE	648	Bacteria/Bacteroidetes/Bacteroidia/Flavobacteriales/Cryomorphaceae_3/uncultured
unbinned	3300031230.a:Ga0321427_11190265	bacteria	1.1e-47	22	254	232	TRUE	254	Bacteria/Proteobacteria/Gammaproteobacteria/Alteromonadales_2/Alteromonadaceae_1/Alteromonas_1
unbinned	3300031230.a:Ga0321427_10870855	bacteria	8.4e-11	232	300	68	FALSE	306	Bacteria/Proteobacteria/Gammaproteobacteria
unbinned	3300031230.a:Ga0321427_10768241	bacteria	5.7e-07	229	328	99	TRUE	330	Bacteria/Proteobacteria/Gammaproteobacteria/Alteromonadales_1/Alteromonadaceae/Rheinheimera
unbinned	3300031230.a:Ga0321427_10683262	bacteria	3.9e-77	19	354	335	FALSE	354	Bacteria/Kiritimatiellaeota_Kiritimatiellae/WCHB1-41
unbinned	3300031230.a:Ga0321427_10081750	bacteria	7.3e-188	2	768	766	TRUE	1262	Bacteria/Cyanobacteria/Melainabacteria/Caenarcaniphilales
unbinned	3300031230.a:Ga0321427_10994827	bacteria	2.3e-77	2	287	285	TRUE	288	Bacteria/Proteobacteria/Gammaproteobacteria/Enterobacteriales_Enterobacteriaceae/Escherichia-Shigella_1
unbinned	3300031230.a:Ga0321427_10455941	bacteria	5e-102	34	441	407	TRUE	447	Bacteria/Proteobacteria/Gammaproteobacteria/Cellvibrionales/Cellvibrionaceae_3/Marinagarivorans
unbinned	3300031230.a:Ga0321427_10100621	bacteria	5e-288	4	1114	1110	FALSE	1117	Bacteria/Actinobacteria/Acidimicrobiia/Microtrichales/Ilumatobacteraceae/uncultured
unbinned	3300031230.a:Ga0321427_10982563	bacteria	1.4e-29	31	230	199	TRUE	289	Bacteria/Proteobacteria/Gammaproteobacteria/Oceanospirillales_2/Endozoicomonadaceae/Endozoicomonas
unbinned	3300031230.a:Ga0321427_10006024	bacteria	0	215	1768	1553	FALSE	5767	Bacteria/Proteobacteria_Deltaproteobacteria/Bdellovibrionales/Bacteriovoracaceae/Peredibacter
unbinned	3300031230.a:Ga0321427_10135349	bacteria	3.4e-171	1	723	722	TRUE	936	Bacteria/Proteobacteria/Gammaproteobacteria/Pseudomonadales_Pseudomonadaceae/Pseudomonas_1
unbinned	3300031230.a:Ga0321427_10468808	bacteria	9.1e-91	2	428	426	FALSE	439	Bacteria/Bacteroidetes/Bacteroidia/Flavobacteriales/Flavobacteriaceae_1/Mesonia_1
unbinned	3300031230.a:Ga0321427_11190366	archaea	2.7e-36	2	244	242	TRUE	244	Bacteria/Proteobacteria/Gammaproteobacteria/Alteromonadales_1/uncultured
unbinned	3300031230.a:Ga0321427_10907946	bacteria	2e-68	1	298	297	FALSE	299	Bacteria/Bacteroidetes/Bacteroidia/Flavobacteriales/Flavobacteriaceae_1/Costertonia
unbinned	3300031230.a:Ga0321427_10266497	bacteria	3.5e-50	2	265	263	TRUE	620	Bacteria/Proteobacteria/Alphaproteobacteria/Rhodobacterales_Rhodobacteraceae_1/Roseobacter clade NAC11-7 lineage
unbinned	3300031230.a:Ga0321427_11190360	bacteria	4.7e-55	1	245	244	FALSE	245	Bacteria/Proteobacteria/Gammaproteobacteria/Alteromonadales_Shewanellaceae
unbinned	3300031230.a:Ga0321427_10037698	bacteria	0	3	1438	1435	TRUE	1978	Bacteria/Proteobacteria/Gammaproteobacteria/Pseudomonadales_Moraxellaceae/Psychrobacter
unbinned	3300031230.a:Ga0321427_10656039	bacteria	3.7e-69	3	358	355	TRUE	363	Bacteria/Proteobacteria/Alphaproteobacteria/Rickettsiales/Mitochondria
unbinned	3300031230.a:Ga0321427_10832927	bacteria	1.2e-75	1	309	308	TRUE	314	Bacteria/Proteobacteria/Gammaproteobacteria/Alteromonadales_2/Alteromonadaceae_1
unbinned	3300031230.a:Ga0321427_10699454	bacteria	4.4e-66	1	342	341	TRUE	349	Bacteria/Marinimicrobia (SAR406 clade)
unbinned	3300031230.a:Ga0321427_11162609	bacteria	2.3e-37	20	278	258	FALSE	279	Bacteria/Proteobacteria/Gammaproteobacteria/Oceanospirillales_Saccharospirillaceae
unbinned	3300031230.a:Ga0321427_10700304	bacteria	4.7e-15	208	349	141	TRUE	349	Bacteria/Bacteroidetes/Bacteroidia/Flavobacteriales/Flavobacteriaceae_1/NS4 marine group
unbinned	3300031230.a:Ga0321427_10275763	bacteria	4.7e-94	184	606	422	FALSE	607	Bacteria/Proteobacteria/Gammaproteobacteria/Vibrionales_Vibrionaceae/Photobacterium_4
unbinned	3300031230.a:Ga0321427_10926190	bacteria	2.5e-52	52	296	244	TRUE	296	Bacteria/Proteobacteria/Gammaproteobacteria/Alteromonadales_2/Alteromonadaceae_1/XY-R5
unbinned	3300031230.a:Ga0321427_10492720	euk	1.6e-104	1	427	426	TRUE	427	Eukaryota/Opisthokonta_Holozoa/Metazoa (Animalia)/Eumetazoa/Bilateria/Mollusca/Bivalvia/Heteroconchia/Veneroida
unbinned	3300031230.a:Ga0321427_11050238	bacteria	1e-16	1	147	146	FALSE	285	Bacteria/Bacteroidetes/Bacteroidia/Bacteroidales_1/Paludibacteraceae/Paludibacter_1
unbinned	3300031230.a:Ga0321427_11033236	bacteria	4.9e-33	92	286	194	TRUE	286	Bacteria/Bacteroidetes/Bacteroidia/Flavobacteriales/Flavobacteriaceae_1/Flavobacterium_1
unbinned	3300031230.a:Ga0321427_10004507	bacteria	0	725	2270	1545	FALSE	6846	Bacteria/Proteobacteria/Gammaproteobacteria/Betaproteobacteriales/Methylophilaceae/OM43 clade
unbinned	3300031230.a:Ga0321427_10258258	bacteria	8.2e-48	1	225	224	FALSE	632	Bacteria/Proteobacteria/Gammaproteobacteria/Oceanospirillales_1/Nitrincolaceae
unbinned	3300031230.a:Ga0321427_10258950	bacteria	6.9e-117	1	541	540	TRUE	631	Bacteria/Proteobacteria/Gammaproteobacteria/Alteromonadales_2/Colwelliaceae/Colwellia_1
unbinned	3300031230.a:Ga0321427_10370879	bacteria	1.6e-115	3	502	499	FALSE	505	Bacteria/Proteobacteria/Gammaproteobacteria/Alteromonadales_Shewanellaceae/Shewanella
unbinned	3300031230.a:Ga0321427_10248558	bacteria	2.2e-87	1	380	379	TRUE	647	Bacteria/Proteobacteria/Alphaproteobacteria/Rhodobacterales_Rhodobacteraceae_1/Amylibacter
unbinned	3300031230.a:Ga0321427_11190091	bacteria	7.5e-30	36	247	211	FALSE	266	Bacteria/Proteobacteria/Gammaproteobacteria/Alteromonadales_1/Alteromonadaceae/Rheinheimera
unbinned	3300031230.a:Ga0321427_11190096	bacteria	3.9e-11	177	245	68	FALSE	265	Bacteria/Proteobacteria/Gammaproteobacteria
unbinned	3300031230.a:Ga0321427_11103208	bacteria	1.4e-30	18	221	203	TRUE	282	Bacteria/Proteobacteria/Gammaproteobacteria/Oceanospirillales_Saccharospirillaceae
unbinned	3300031230.a:Ga0321427_10002971	bacteria	0	5170	6707	1537	TRUE	8732	Bacteria/Proteobacteria/Gammaproteobacteria/SAR86 clade
unbinned	3300031230.a:Ga0321427_11053016	bacteria	6.2e-09	4	213	209	TRUE	285	Bacteria/Cyanobacteria/Oxyphotobacteria/Chloroplast
unbinned	3300031230.a:Ga0321427_11190643	bacteria	1.4e-32	9	217	208	FALSE	217	Bacteria/Proteobacteria/Gammaproteobacteria/Alteromonadales_1/Alteromonadaceae/Rheinheimera
unbinned	3300031230.a:Ga0321427_10736387	euk	1.1e-76	4	337	333	FALSE	339	Eukaryota/Opisthokonta_Holozoa/Metazoa (Animalia)/Eumetazoa/Ctenophora
unbinned	3300031230.a:Ga0321427_10906185	bacteria	4.8e-28	18	199	181	TRUE	299	Bacteria/Bacteroidetes/Bacteroidia/Flavobacteriales/Flavobacteriaceae_1/Polaribacter
unbinned	3300031230.a:Ga0321427_10044281	bacteria	2.5e-257	1	1002	1001	TRUE	1803	Bacteria/Proteobacteria/Gammaproteobacteria/Alteromonadales_2/Colwelliaceae/Thalassotalea_1
unbinned	3300031230.a:Ga0321427_10488246	bacteria	1.7e-117	1	429	428	TRUE	429	Bacteria/Proteobacteria/Gammaproteobacteria/Oceanospirillales_Saccharospirillaceae/uncultured
unbinned	3300031230.a:Ga0321427_10026216	bacteria	0	464	2024	1560	TRUE	2439	Bacteria/Proteobacteria/Gammaproteobacteria/Vibrionales_Vibrionaceae/Vibrio_2
unbinned	3300031230.a:Ga0321427_10044625	bacteria	0	6	1549	1543	FALSE	1795	Bacteria/Proteobacteria/Gammaproteobacteria/Alteromonadales_Shewanellaceae/Psychrobium
unbinned	3300031230.a:Ga0321427_10470649	bacteria	2.6e-41	2	211	209	FALSE	438	Bacteria/Bacteroidetes/Bacteroidia/Bacteroidales_1/Paludibacteraceae/uncultured
unbinned	3300031230.a:Ga0321427_11190564	bacteria	2.2e-30	7	202	195	FALSE	225	Bacteria/Proteobacteria/Gammaproteobacteria/Alteromonadales_1/Moritellaceae/Paramoritella
unbinned	3300031230.a:Ga0321427_10863782	bacteria	3.5e-70	2	298	296	TRUE	308	Bacteria/Proteobacteria/Alphaproteobacteria/Micavibrionales/Micavibrionaceae/uncultured
unbinned	3300031230.a:Ga0321427_10412967	bacteria	1.3e-97	68	471	403	TRUE	473	Bacteria/Proteobacteria/Gammaproteobacteria/Alteromonadales_1/Alteromonadaceae/Rheinheimera
unbinned	3300031230.a:Ga0321427_10918058	bacteria	6.4e-43	1	281	280	TRUE	297	Bacteria/Bacteroidetes/Bacteroidia/Flavobacteriales/Flavobacteriaceae_1/uncultured
unbinned	3300031230.a:Ga0321427_11003095	bacteria	1.1e-56	1	285	284	TRUE	288	Bacteria/Bacteroidetes/Bacteroidia/Bacteroidales_1/Bacteroidaceae_Bacteroides
unbinned	3300031230.a:Ga0321427_10010704	bacteria	4.9e-292	2931	4111	1180	TRUE	4111	Bacteria/Patescibacteria/Gracilibacteria/JGI 0000069-P22
unbinned	3300031230.a:Ga0321427_10055009	bacteria	7.3e-44	1364	1587	223	TRUE	1587	Bacteria/Bacteroidetes/Bacteroidia/Flavobacteriales/Flavobacteriaceae_1/Actibacter
unbinned	3300031230.a:Ga0321427_10663655	bacteria	2.1e-79	1	358	357	FALSE	360	Bacteria/Bacteroidetes/Bacteroidia/Flavobacteriales/Flavobacteriaceae_1/Croceibacter
unbinned	3300031230.a:Ga0321427_10005971	bacteria	1.1e-44	2	224	222	FALSE	5803	Bacteria/Proteobacteria/Gammaproteobacteria/SAR86 clade
unbinned	3300031230.a:Ga0321427_10895463	bacteria	4.4e-10	7	73	66	TRUE	301	Bacteria/Bacteroidetes/Bacteroidia/Flavobacteriales/Flavobacteriaceae_1/NS5 marine group
unbinned	3300031230.a:Ga0321427_11155048	bacteria	4.4e-61	11	257	246	FALSE	279	Bacteria/Bacteroidetes/Bacteroidia/Cytophagales_1/Cyclobacteriaceae_1/uncultured
unbinned	3300031230.a:Ga0321427_10950915	bacteria	1.9e-69	1	290	289	FALSE	292	Bacteria/Bacteroidetes/Bacteroidia/Cytophagales_1/Cyclobacteriaceae_1/uncultured
unbinned	3300031230.a:Ga0321427_10797861	euk	2.1e-74	2	322	320	FALSE	323	Eukaryota/SAR_Stramenopiles/MAST-3/MAST-3B
unbinned	3300031230.a:Ga0321427_11055541	bacteria	5.4e-63	19	284	265	FALSE	285	Bacteria/Proteobacteria_Deltaproteobacteria/Bdellovibrionales/Bacteriovoracaceae/Peredibacter
unbinned	3300031230.a:Ga0321427_11190415	archaea	7.7e-11	4	213	209	TRUE	240	Bacteria/Proteobacteria/Gammaproteobacteria/Alteromonadales_1/Alteromonadaceae/Rheinheimera
unbinned	3300031230.a:Ga0321427_10015094	bacteria	0	1746	3271	1525	TRUE	3370	Bacteria/Bacteroidetes/Bacteroidia/Flavobacteriales/Cryomorphaceae_3/uncultured
unbinned	3300031230.a:Ga0321427_10020180	bacteria	0	940	2481	1541	FALSE	2848	Bacteria/Proteobacteria/Gammaproteobacteria/Thiomicrospirales_Thioglobaceae/SUP05 cluster
unbinned	3300031230.a:Ga0321427_10641229	bacteria	4.8e-65	69	368	299	TRUE	368	Bacteria/Actinobacteria/Acidimicrobiia/Microtrichales/Microtrichaceae/Sva0996 marine group
unbinned	3300031230.a:Ga0321427_10833696	bacteria	3.3e-81	1	314	313	FALSE	314	Bacteria/Proteobacteria/Gammaproteobacteria/Cellvibrionales/Halieaceae/OM60(NOR5) clade
unbinned	3300031230.a:Ga0321427_11174803	bacteria	4.2e-58	3	275	272	TRUE	278	Bacteria/Bacteroidetes/Bacteroidia/Flavobacteriales/Cryomorphaceae_1/NS10 marine group
unbinned	3300031230.a:Ga0321427_10264382	bacteria	1.9e-135	9	541	532	FALSE	623	Bacteria/Proteobacteria/Gammaproteobacteria/Alteromonadales_2/Alteromonadaceae_1/Alteromonas_1
unbinned	3300031230.a:Ga0321427_10381016	bacteria	2.8e-59	1	345	344	TRUE	497	Bacteria/Epsilonbacteraeota/Campylobacteria/Campylobacterales/Arcobacteraceae_Arcobacter
unbinned	3300031230.a:Ga0321427_10560710	bacteria	1.1e-29	47	228	181	TRUE	397	Bacteria/Bacteroidetes/Bacteroidia/Flavobacteriales/Flavobacteriaceae_1
unbinned	3300031230.a:Ga0321427_10430379	bacteria	8.9e-39	203	462	259	FALSE	462	Bacteria/Proteobacteria/Gammaproteobacteria/JTB23
unbinned	3300031230.a:Ga0321427_10987425	bacteria	8.1e-45	2	289	287	TRUE	289	Bacteria/Spirochaetes/Spirochaetia/Spirochaetales_Spirochaetaceae/Sphaerochaeta
unbinned	3300031230.a:Ga0321427_10755730	bacteria	1e-14	213	333	120	FALSE	333	Bacteria/Proteobacteria/Gammaproteobacteria
unbinned	3300031230.a:Ga0321427_11012229	bacteria	3.9e-22	1	162	161	FALSE	287	Bacteria/Proteobacteria/Gammaproteobacteria/Enterobacteriales_Enterobacteriaceae/Escherichia-Shigella_1
unbinned	3300031230.a:Ga0321427_10015164	bacteria	0	1250	2770	1520	FALSE	3360	Bacteria/Bacteroidetes/Bacteroidia/Flavobacteriales/Flavobacteriaceae_1/Tenacibaculum_2
unbinned	3300031230.a:Ga0321427_10685768	bacteria	9e-15	1	122	121	TRUE	353	Bacteria/Proteobacteria/Gammaproteobacteria
unbinned	3300031230.a:Ga0321427_10192665	bacteria	7.8e-190	19	755	736	TRUE	756	Bacteria/Cyanobacteria/Melainabacteria/Caenarcaniphilales
unbinned	3300031230.a:Ga0321427_10375595	bacteria	1.5e-29	321	502	181	FALSE	502	Bacteria/Cyanobacteria/Oxyphotobacteria/Chloroplast
unbinned	3300031230.a:Ga0321427_10986543	bacteria	2e-23	1	159	158	TRUE	289	Bacteria/Bacteroidetes/Bacteroidia/Flavobacteriales/Flavobacteriaceae_1
unbinned	3300031230.a:Ga0321427_10423326	bacteria	9.2e-128	2	466	464	FALSE	466	Bacteria/Proteobacteria_Deltaproteobacteria/Bdellovibrionales/Bacteriovoracaceae/Halobacteriovorax
unbinned	3300031230.a:Ga0321427_10427851	bacteria	1.3e-29	247	459	212	FALSE	463	Bacteria/Patescibacteria/Gracilibacteria/JGI 0000069-P22
unbinned	3300031230.a:Ga0321427_10971933	bacteria	4.4e-29	50	229	179	FALSE	290	Bacteria/Proteobacteria_Deltaproteobacteria/Desulfuromonadales/Sva1033
unbinned	3300031230.a:Ga0321427_10287077	bacteria	5.2e-72	276	592	316	TRUE	592	Bacteria/Bacteroidetes/Bacteroidia/Flavobacteriales/NS9 marine group
unbinned	3300031230.a:Ga0321427_11016238	bacteria	5.6e-75	2	286	284	FALSE	287	Bacteria/Proteobacteria/Gammaproteobacteria/Oceanospirillales_Halomonadaceae/Halomonas_2
unbinned	3300031230.a:Ga0321427_10442028	bacteria	1.3e-73	103	455	352	FALSE	455	Bacteria/Proteobacteria/Alphaproteobacteria/Rickettsiales/Mitochondria
unbinned	3300031230.a:Ga0321427_10929414	bacteria	8.2e-62	2	286	284	TRUE	295	Bacteria/Actinobacteria/Acidimicrobiia/Microtrichales/Ilumatobacteraceae/Ilumatobacter
unbinned	3300031230.a:Ga0321427_10588588	bacteria	6.3e-24	1	165	164	TRUE	387	Bacteria/Epsilonbacteraeota/Campylobacteria/Campylobacterales/Arcobacteraceae_Arcobacter
unbinned	3300031230.a:Ga0321427_10559144	bacteria	2e-17	1	149	148	FALSE	398	Bacteria/Bacteroidetes/Bacteroidia/Bacteroidales_1/Marinifilaceae_1/Marinifilum
unbinned	3300031230.a:Ga0321427_10118806	bacteria	2.7e-284	2	998	996	TRUE	1012	Bacteria/Proteobacteria/Gammaproteobacteria/Thiohalorhabdales_Thiohalorhabdaceae/uncultured
unbinned	3300031230.a:Ga0321427_10115724	bacteria	2.5e-19	2	201	199	FALSE	1028	Archaea/Euryarchaeota/Thermoplasmata/Marine Group II
unbinned	3300031230.a:Ga0321427_10991066	archaea	3.5e-44	1	289	288	TRUE	289	Bacteria/Firmicutes/Negativicutes_Selenomonadales/Acidaminococcaceae
unbinned	3300031230.a:Ga0321427_10823535	bacteria	1.6e-28	88	317	229	FALSE	317	Bacteria/Patescibacteria/Parcubacteria/Candidatus Adlerbacteria
unbinned	3300031230.a:Ga0321427_10471090	bacteria	2.9e-21	4	134	130	TRUE	438	Bacteria/Proteobacteria/Gammaproteobacteria/SAR86 clade
unbinned	3300031230.a:Ga0321427_11190195	bacteria	9.2e-59	1	255	254	FALSE	255	Bacteria/Proteobacteria/Gammaproteobacteria/Vibrionales_Vibrionaceae/Vibrio_2
unbinned	3300031230.a:Ga0321427_10941001	archaea	9.7e-48	1	293	292	TRUE	293	Bacteria/Proteobacteria/Alphaproteobacteria/Micavibrionales/Micavibrionaceae/uncultured
unbinned	3300031230.a:Ga0321427_10297023	archaea	1.1e-46	7	540	533	FALSE	580	Eukaryota/Archaeplastida_Chloroplastida/Chlorophyta/Mamiellophyceae
unbinned	3300031230.a:Ga0321427_10019194	bacteria	4.5e-55	2679	2930	251	TRUE	2930	Bacteria/Proteobacteria/Alphaproteobacteria/Rhodobacterales_Rhodobacteraceae_1/Roseobacter clade NAC11-7 lineage
unbinned	3300031230.a:Ga0321427_10197424	bacteria	3e-161	140	745	605	TRUE	745	Bacteria/Proteobacteria/Gammaproteobacteria/Oceanospirillales_Alcanivoracaceae_Alcanivorax
unbinned	3300031230.a:Ga0321427_10752859	bacteria	1.8e-64	1	307	306	TRUE	334	Bacteria/Bacteroidetes/Bacteroidia/Flavobacteriales/Flavobacteriaceae_1/Pseudofulvibacter
unbinned	3300031230.a:Ga0321427_11190217	bacteria	4.7e-64	16	252	236	FALSE	255	Bacteria/Proteobacteria/Gammaproteobacteria/Alteromonadales_1/Alteromonadaceae/Rheinheimera
unbinned	3300031230.a:Ga0321427_11190199	bacteria	1.7e-41	38	255	217	TRUE	255	Bacteria/Proteobacteria/Gammaproteobacteria/Alteromonadales_1/Moritellaceae/Paramoritella
unbinned	3300031230.a:Ga0321427_11190211	bacteria	6.3e-64	4	242	238	TRUE	255	Bacteria/Proteobacteria/Gammaproteobacteria/Alteromonadales_1/Alteromonadaceae/Rheinheimera
unbinned	3300031230.a:Ga0321427_11011616	bacteria	4.3e-21	2	168	166	TRUE	287	Bacteria/Proteobacteria/Gammaproteobacteria/Alteromonadales_1/Alteromonadaceae/Rheinheimera
unbinned	3300031230.a:Ga0321427_10142020	bacteria	4.8e-192	2	838	836	TRUE	909	Bacteria/Bacteroidetes/Bacteroidia/Flavobacteriales/NS9 marine group
unbinned	3300031230.a:Ga0321427_10875522	bacteria	2.1e-78	3	305	302	TRUE	305	Bacteria/Proteobacteria/Gammaproteobacteria/Alteromonadales_2/Idiomarinaceae/Idiomarina
unbinned	3300031230.a:Ga0321427_10540526	bacteria	2.2e-101	10	405	395	TRUE	406	Bacteria/Proteobacteria_Deltaproteobacteria/Bdellovibrionales/Bdellovibrionaceae/OM27 clade
unbinned	3300031230.a:Ga0321427_11136098	bacteria	6.9e-28	44	228	184	TRUE	280	Bacteria/Epsilonbacteraeota/Campylobacteria/Campylobacterales/Sulfurospirillaceae_Sulfurospirillum
unbinned	3300031230.a:Ga0321427_10573323	bacteria	3.3e-116	1	386	385	TRUE	392	Bacteria/Proteobacteria/Gammaproteobacteria/Alteromonadales_2/Pseudoalteromonadaceae_1/Pseudoalteromonas
unbinned	3300031230.a:Ga0321427_10928575	bacteria	6.4e-71	10	289	279	TRUE	295	Bacteria/Bacteroidetes/Bacteroidia/Flavobacteriales/Flavobacteriaceae_1/Arenibacter
unbinned	3300031230.a:Ga0321427_11190281	bacteria	7e-11	11	79	68	TRUE	253	Bacteria/Proteobacteria/Gammaproteobacteria
unbinned	3300031230.a:Ga0321427_10702358	bacteria	3.5e-94	2	348	346	TRUE	348	Bacteria/Proteobacteria/Gammaproteobacteria/Vibrionales_Vibrionaceae
unbinned	3300031230.a:Ga0321427_10763272	bacteria	2.9e-95	1	331	330	FALSE	331	Bacteria/Proteobacteria/Gammaproteobacteria/Alteromonadales_2/Psychromonadaceae
unbinned	3300031230.a:Ga0321427_10022538	bacteria	0	908	2440	1532	TRUE	2665	Bacteria/Bacteroidetes/Bacteroidia/Flavobacteriales/Crocinitomicaceae/Fluviicola
unbinned	3300031230.a:Ga0321427_10870792	bacteria	6.9e-27	1	169	168	FALSE	306	Bacteria/Proteobacteria/Gammaproteobacteria
unbinned	3300031230.a:Ga0321427_10071388	bacteria	9.4e-55	1113	1364	251	TRUE	1365	Bacteria/Proteobacteria/Gammaproteobacteria/Alteromonadales_1/uncultured
unbinned	3300031230.a:Ga0321427_10121472	bacteria	1.3e-284	4	980	976	TRUE	998	Bacteria/Proteobacteria/Gammaproteobacteria/Thiotrichales_Thiotrichaceae_1/Leucothrix
unbinned	3300031230.a:Ga0321427_11070374	bacteria	1.8e-71	3	284	281	TRUE	284	Bacteria/Bacteroidetes/Bacteroidia/Sphingobacteriales/NS11-12 marine group
unbinned	3300031230.a:Ga0321427_11190587	bacteria	1.6e-30	7	200	193	FALSE	223	Bacteria/Proteobacteria/Gammaproteobacteria/Alteromonadales_1/Moritellaceae/Paramoritella
unbinned	3300031230.a:Ga0321427_10500435	bacteria	6.7e-70	1	396	395	TRUE	424	Bacteria/Proteobacteria/Alphaproteobacteria/Rickettsiales/Mitochondria
unbinned	3300031230.a:Ga0321427_10131717	bacteria	2.8e-34	3	536	533	FALSE	951	Eukaryota/Opisthokonta_Holozoa/Metazoa (Animalia)/Eumetazoa
unbinned	3300031230.a:Ga0321427_10281720	bacteria	5.1e-52	3	248	245	FALSE	599	Bacteria/Proteobacteria/Gammaproteobacteria/Vibrionales_Vibrionaceae/Photobacterium_4
unbinned	3300031230.a:Ga0321427_10022839	bacteria	0	1	1213	1212	FALSE	2643	Bacteria/Proteobacteria/Gammaproteobacteria/Alteromonadales_2/Pseudoalteromonadaceae_2/Psychrosphaera
unbinned	3300031230.a:Ga0321427_10940323	bacteria	4.1e-47	1	293	292	FALSE	293	Bacteria/Proteobacteria/Gammaproteobacteria/Alteromonadales_2/Colwelliaceae/Colwellia_1
unbinned	3300031230.a:Ga0321427_10221084	bacteria	2.6e-185	1	675	674	FALSE	695	Bacteria/Proteobacteria_Deltaproteobacteria/SAR324 clade(Marine group B)
unbinned	3300031230.a:Ga0321427_10098736	bacteria	4.5e-57	1	330	329	TRUE	1129	Bacteria/Bacteroidetes/Bacteroidia/Flavobacteriales/Flavobacteriaceae_1/Bizionia_2
unbinned	3300031230.a:Ga0321427_10414436	bacteria	5.3e-116	9	472	463	TRUE	472	Bacteria/Bacteroidetes/Bacteroidia/Flavobacteriales/Flavobacteriaceae_1/Aquibacter
unbinned	3300031230.a:Ga0321427_10553162	bacteria	4.4e-80	2	392	390	TRUE	401	Bacteria/Verrucomicrobia_Verrucomicrobiae/Opitutales/Puniceicoccaceae/MB11C04 marine group
unbinned	3300031230.a:Ga0321427_11116631	bacteria	5.9e-14	163	282	119	FALSE	282	Bacteria/Proteobacteria/Gammaproteobacteria/Enterobacteriales_Enterobacteriaceae/Enterobacter_2
unbinned	3300031230.a:Ga0321427_10005206	bacteria	0	1448	2986	1538	FALSE	6271	Bacteria/Proteobacteria/Gammaproteobacteria/SAR86 clade
unbinned	3300031230.a:Ga0321427_10272973	bacteria	4.4e-80	1	415	414	TRUE	611	Bacteria/Proteobacteria/Gammaproteobacteria/SAR86 clade
unbinned	3300031230.a:Ga0321427_10713049	bacteria	1.9e-68	31	345	314	TRUE	345	Bacteria/Proteobacteria/Alphaproteobacteria/Puniceispirillales/SAR116 clade
unbinned	3300031230.a:Ga0321427_10286133	archaea	1e-90	1	446	445	TRUE	594	Archaea/Euryarchaeota/Thermoplasmata/Marine Group II
unbinned	3300031230.a:Ga0321427_11077199	bacteria	9.5e-53	1	283	282	TRUE	284	Bacteria/Proteobacteria/Gammaproteobacteria/Cellvibrionales/Halieaceae/OM60(NOR5) clade
unbinned	3300031230.a:Ga0321427_10505027	bacteria	1.4e-54	168	420	252	TRUE	421	Bacteria/Proteobacteria/Gammaproteobacteria/Alteromonadales_2/Psychromonadaceae
unbinned	3300031230.a:Ga0321427_10702724	bacteria	3.1e-32	1	260	259	TRUE	348	Bacteria/Proteobacteria_Deltaproteobacteria/Bdellovibrionales/Bacteriovoracaceae/Halobacteriovorax
unbinned	3300031230.a:Ga0321427_10407613	bacteria	8.5e-127	7	477	470	TRUE	477	Bacteria/Proteobacteria/Alphaproteobacteria/Micavibrionales
unbinned	3300031230.a:Ga0321427_10004908	euk	0	2962	4690	1728	TRUE	6500	Eukaryota/SAR_Alveolata/Protalveolata_Syndiniales/Syndiniales Group I
unbinned	3300031230.a:Ga0321427_10289413	bacteria	1.2e-64	237	589	352	FALSE	589	Bacteria/Epsilonbacteraeota/Campylobacteria/Campylobacterales/Arcobacteraceae_Arcobacter
unbinned	3300031230.a:Ga0321427_10613559	bacteria	2.3e-75	1	377	376	TRUE	377	Bacteria/Bacteroidetes/Bacteroidia/Flavobacteriales/Flavobacteriaceae_1
unbinned	3300031230.a:Ga0321427_10218155	bacteria	5.2e-168	1	701	700	TRUE	701	Bacteria/Planctomycetes/Planctomycetacia/Pirellulales_Pirellulaceae/Rubripirellula
unbinned	3300031230.a:Ga0321427_10326833	bacteria	1.8e-156	4	545	541	FALSE	546	Bacteria/Proteobacteria/Alphaproteobacteria/Rhodobacterales_Rhodobacteraceae_1
unbinned	3300031230.a:Ga0321427_10527880	bacteria	4.5e-107	3	411	408	FALSE	411	Bacteria/Proteobacteria/Alphaproteobacteria/Puniceispirillales/SAR116 clade/Candidatus Puniceispirillum
unbinned	3300031230.a:Ga0321427_10605777	bacteria	2.6e-36	147	380	233	FALSE	380	Bacteria/Proteobacteria/Alphaproteobacteria/Micavibrionales/Micavibrionaceae/uncultured
unbinned	3300031230.a:Ga0321427_10837567	bacteria	2e-70	1	310	309	TRUE	313	Bacteria/Proteobacteria/Alphaproteobacteria/Rhodospirillales/AEGEAN-169 marine group
unbinned	3300031230.a:Ga0321427_10013300	bacteria	4.3e-253	2692	3621	929	FALSE	3621	Bacteria/Proteobacteria/Alphaproteobacteria/Rhodobacterales_Rhodobacteraceae_1/Planktomarina
unbinned	3300031230.a:Ga0321427_10837563	bacteria	1.1e-71	11	313	302	FALSE	313	Bacteria/Bacteroidetes/Bacteroidia/Flavobacteriales/Flavobacteriaceae_1/Olleya
unbinned	3300031230.a:Ga0321427_10379511	bacteria	3e-80	93	498	405	FALSE	498	Bacteria/Epsilonbacteraeota/Campylobacteria/Campylobacterales/Arcobacteraceae_Arcobacter
unbinned	3300031230.a:Ga0321427_10939839	bacteria	2.9e-65	2	280	278	FALSE	294	Bacteria/Proteobacteria/Gammaproteobacteria/Alteromonadales_2/Idiomarinaceae/Idiomarina
unbinned	3300031230.a:Ga0321427_10089378	bacteria	1.4e-232	214	1197	983	FALSE	1197	Bacteria/Bacteroidetes/Bacteroidia/Flavobacteriales/Flavobacteriaceae_1/Nonlabens
unbinned	3300031230.a:Ga0321427_11175463	bacteria	2.1e-29	2	250	248	TRUE	278	Bacteria/Epsilonbacteraeota/Campylobacteria/Campylobacterales/Arcobacteraceae_Arcobacter
unbinned	3300031230.a:Ga0321427_10705850	archaea	6.3e-48	2	346	344	FALSE	347	Bacteria/Bacteroidetes/Bacteroidia/Flavobacteriales/NS9 marine group
unbinned	3300031230.a:Ga0321427_11179596	archaea	3.4e-19	2	277	275	TRUE	278	Bacteria/Proteobacteria/Alphaproteobacteria/Rhodobacterales_Rhodobacteraceae_1/Palleronia
unbinned	3300031230.a:Ga0321427_10660348	bacteria	7e-11	284	352	68	FALSE	361	Bacteria/Proteobacteria/Gammaproteobacteria
unbinned	3300031230.a:Ga0321427_10195319	bacteria	1.9e-84	2	416	414	TRUE	750	Bacteria/Bacteroidetes/Bacteroidia/Flavobacteriales/Flavobacteriaceae_1/uncultured
unbinned	3300031230.a:Ga0321427_10498534	bacteria	3.7e-114	1	411	410	TRUE	424	Bacteria/Proteobacteria/Gammaproteobacteria/Alteromonadales_2/Psychromonadaceae/Psychromonas
unbinned	3300031230.a:Ga0321427_10824424	bacteria	3.6e-28	1	240	239	TRUE	316	Bacteria/Bacteroidetes/Bacteroidia/Flavobacteriales/Flavobacteriaceae_1/Tenacibaculum_2
unbinned	3300031230.a:Ga0321427_10885869	bacteria	1.4e-57	3	287	284	FALSE	303	Bacteria/Bacteroidetes/Bacteroidia/Flavobacteriales/Flavobacteriaceae_1/Gilvibacter
unbinned	3300031230.a:Ga0321427_10032676	bacteria	2e-212	1	829	828	FALSE	2150	Bacteria/Bacteroidetes/Bacteroidia/Flavobacteriales/Flavobacteriaceae_1/Bizionia_2
unbinned	3300031230.a:Ga0321427_10033926	bacteria	0	143	1636	1493	FALSE	2104	Bacteria/Proteobacteria/Alphaproteobacteria/Rhodospirillales/AEGEAN-169 marine group
unbinned	3300031230.a:Ga0321427_10010647	bacteria	0	2894	4122	1228	TRUE	4123	Bacteria/Proteobacteria/Alphaproteobacteria/SAR11 clade/Clade I/Clade Ia
unbinned	3300031230.a:Ga0321427_10325909	bacteria	6.8e-134	1	546	545	FALSE	547	Bacteria/Proteobacteria/Gammaproteobacteria/Alteromonadales_2/Alteromonadaceae_1/Alteromonas_1
unbinned	3300031230.a:Ga0321427_11071051	euk	2e-62	2	284	282	FALSE	284	Eukaryota/SAR_Alveolata/Protalveolata_Syndiniales/Amoebophrya
unbinned	3300031230.a:Ga0321427_10637256	bacteria	3.9e-74	14	369	355	FALSE	369	Bacteria/Proteobacteria/Gammaproteobacteria/Cellvibrionales/Halieaceae/OM60(NOR5) clade
unbinned	3300031230.a:Ga0321427_11100191	bacteria	2.1e-57	1	282	281	TRUE	282	Bacteria/Bacteroidetes/Bacteroidia/Flavobacteriales/Flavobacteriaceae_1/Marixanthomonas
unbinned	3300031230.a:Ga0321427_10542177	bacteria	2.9e-94	1	405	404	TRUE	405	Bacteria/Patescibacteria/Gracilibacteria/JGI 0000069-P22
unbinned	3300031230.a:Ga0321427_10164575	bacteria	3.8e-232	4	832	828	FALSE	832	Bacteria/Proteobacteria/Gammaproteobacteria/Alteromonadales_Shewanellaceae/Shewanella
unbinned	3300031230.a:Ga0321427_10963640	bacteria	1.7e-14	148	290	142	TRUE	290	Bacteria/Bacteroidetes/Bacteroidia/Flavobacteriales/Flavobacteriaceae_1/Winogradskyella
unbinned	3300031230.a:Ga0321427_10013730	bacteria	0	471	2032	1561	TRUE	3555	Bacteria/Proteobacteria/Gammaproteobacteria/UBA10353 marine group
unbinned	3300031230.a:Ga0321427_10213508	bacteria	2.1e-182	18	709	691	TRUE	711	Bacteria/Bacteroidetes/Bacteroidia/Flavobacteriales/NS7 marine group
unbinned	3300031230.a:Ga0321427_10074349	bacteria	7.8e-187	2	729	727	TRUE	1333	Bacteria/Proteobacteria/Alphaproteobacteria/Caulobacterales/Hyphomonadaceae/Hellea
unbinned	3300031230.a:Ga0321427_10752241	bacteria	8.1e-80	3	334	331	TRUE	334	Bacteria/Proteobacteria/Gammaproteobacteria/Alteromonadales_2/Pseudoalteromonadaceae_1/Pseudoalteromonas
unbinned	3300031230.a:Ga0321427_10648435	bacteria	2.7e-100	2	361	359	FALSE	365	Bacteria/Bacteroidetes/Bacteroidia/Chitinophagales/Saprospiraceae/uncultured
unbinned	3300031230.a:Ga0321427_10516032	bacteria	5.4e-87	3	412	409	FALSE	416	Bacteria/Planctomycetes/Phycisphaerae/Phycisphaerales/Phycisphaeraceae/CL500-3
unbinned	3300031230.a:Ga0321427_10938572	bacteria	1e-27	110	287	177	FALSE	294	Bacteria/Proteobacteria/Alphaproteobacteria/Rhodospirillales/AEGEAN-169 marine group
unbinned	3300031230.a:Ga0321427_10833117	bacteria	7.2e-76	1	314	313	TRUE	314	Bacteria/Epsilonbacteraeota/Campylobacteria/Campylobacterales/Arcobacteraceae_Arcobacter
unbinned	3300031230.a:Ga0321427_10977742	bacteria	1.5e-28	1	172	171	FALSE	289	Bacteria/Proteobacteria/Gammaproteobacteria/Alteromonadales_Marinobacteraceae_Marinobacter
unbinned	3300031230.a:Ga0321427_10122652	bacteria	3e-30	764	966	202	FALSE	992	Bacteria/Proteobacteria/Gammaproteobacteria/Alteromonadales_Shewanellaceae
unbinned	3300031230.a:Ga0321427_10339204	bacteria	1.7e-87	1	433	432	TRUE	534	Bacteria/Bacteroidetes/Bacteroidia/Flavobacteriales/Flavobacteriaceae_1/NS5 marine group
unbinned	3300031230.a:Ga0321427_10008206	bacteria	0	194	1729	1535	FALSE	4810	Bacteria/Bacteroidetes/Bacteroidia/Flavobacteriales/Flavobacteriaceae_1/Pricia
unbinned	3300031230.a:Ga0321427_10241700	bacteria	4.5e-11	570	638	68	FALSE	658	Bacteria/Proteobacteria/Gammaproteobacteria
unbinned	3300031230.a:Ga0321427_10791804	bacteria	1.3e-56	49	324	275	FALSE	324	Bacteria/Proteobacteria/Alphaproteobacteria/Sphingomonadales_Sphingomonadaceae/Erythrobacter_1
unbinned	3300031230.a:Ga0321427_10763263	bacteria	2.2e-06	213	327	114	TRUE	331	Bacteria/Proteobacteria/Gammaproteobacteria/Enterobacteriales_Enterobacteriaceae/Escherichia-Shigella_1
unbinned	3300031230.a:Ga0321427_11190381	bacteria	6.1e-70	2	243	241	TRUE	243	Bacteria/Proteobacteria/Gammaproteobacteria/Vibrionales_Vibrionaceae/Vibrio_1
unbinned	3300031230.a:Ga0321427_10751398	bacteria	2.3e-64	1	305	304	FALSE	335	Bacteria/Bacteroidetes/Bacteroidia/Chitinophagales/Saprospiraceae/Lewinella
unbinned	3300031230.a:Ga0321427_10882303	bacteria	3.1e-66	5	304	299	FALSE	304	Bacteria/Proteobacteria/Gammaproteobacteria/Oceanospirillales_Alcanivoracaceae_Alcanivorax
unbinned	3300031230.a:Ga0321427_10137428	bacteria	2.3e-11	19	118	99	TRUE	927	Bacteria/Proteobacteria/Gammaproteobacteria
unbinned	3300031230.a:Ga0321427_10888017	bacteria	9.7e-30	79	281	202	FALSE	303	Bacteria/Proteobacteria/Gammaproteobacteria/Vibrionales_Vibrionaceae/Catenococcus
unbinned	3300031230.a:Ga0321427_10262254	bacteria	9.8e-11	23	92	69	TRUE	627	Bacteria/Proteobacteria/Gammaproteobacteria/Enterobacteriales_Enterobacteriaceae/Enterobacter_2
unbinned	3300031230.a:Ga0321427_10783212	bacteria	5.8e-11	10	79	69	TRUE	326	Bacteria/Proteobacteria/Gammaproteobacteria
unbinned	3300031230.a:Ga0321427_10660616	bacteria	5.4e-35	104	361	257	FALSE	361	Bacteria/Bacteroidetes/Bacteroidia/Flavobacteriales/Flavobacteriaceae_1/Mesonia_1
unbinned	3300031230.a:Ga0321427_11190551	bacteria	2.2e-41	10	227	217	TRUE	227	Bacteria/Proteobacteria/Gammaproteobacteria/Alteromonadales_1/Moritellaceae/Paramoritella
unbinned	3300031230.a:Ga0321427_10239923	bacteria	3.1e-99	155	660	505	FALSE	661	Bacteria/Bacteroidetes/Bacteroidia/Flavobacteriales/Flavobacteriaceae_1/Polaribacter 2
unbinned	3300031230.a:Ga0321427_10948019	bacteria	1.7e-30	17	206	189	TRUE	292	Bacteria/Epsilonbacteraeota/Campylobacteria/Campylobacterales/Arcobacteraceae_Arcobacter
unbinned	3300031230.a:Ga0321427_10934491	bacteria	7.9e-06	189	292	103	TRUE	294	Bacteria/Bacteroidetes/Bacteroidia/Flavobacteriales/Flavobacteriaceae_1/NS4 marine group
unbinned	3300031230.a:Ga0321427_10022274	bacteria	0	954	2504	1550	TRUE	2684	Bacteria/Verrucomicrobia_Verrucomicrobiae/Verrucomicrobiales/Rubritaleaceae/Roseibacillus
unbinned	3300031230.a:Ga0321427_11153454	bacteria	1.1e-60	6	279	273	FALSE	279	Bacteria/Proteobacteria/Gammaproteobacteria/Vibrionales_Vibrionaceae/Catenococcus
unbinned	3300031230.a:Ga0321427_11184901	bacteria	3e-44	5	277	272	TRUE	278	Bacteria/Proteobacteria/Alphaproteobacteria/Rickettsiales/Mitochondria
unbinned	3300031230.a:Ga0321427_10630438	bacteria	7e-92	2	371	369	FALSE	372	Bacteria/Proteobacteria/Alphaproteobacteria/Puniceispirillales/uncultured
unbinned	3300031230.a:Ga0321427_10450776	bacteria	2.4e-66	144	449	305	TRUE	449	Bacteria/Bacteroidetes/Bacteroidia/Flavobacteriales/Cryomorphaceae_3/uncultured
unbinned	3300031230.a:Ga0321427_11133999	bacteria	5.2e-69	1	281	280	FALSE	281	Bacteria/Proteobacteria/Alphaproteobacteria/Rhodospirillales_Magnetospiraceae/uncultured
unbinned	3300031230.a:Ga0321427_11117191	bacteria	9.3e-74	4	279	275	FALSE	281	Bacteria/Proteobacteria/Alphaproteobacteria/Rhodobacterales_Rhodobacteraceae_1/Roseobacter clade NAC11-7 lineage
unbinned	3300031230.a:Ga0321427_10976002	bacteria	6.9e-55	1	280	279	TRUE	290	Bacteria/Proteobacteria/Alphaproteobacteria/Caulobacterales/Hyphomonadaceae
unbinned	3300031230.a:Ga0321427_10910473	bacteria	4.9e-11	13	85	72	TRUE	299	Bacteria/Proteobacteria/Gammaproteobacteria
unbinned	3300031230.a:Ga0321427_10251066	archaea	3.2e-88	1	643	642	TRUE	643	Bacteria/Proteobacteria/Gammaproteobacteria/Alteromonadales_2/Idiomarinaceae/Idiomarina
unbinned	3300031230.a:Ga0321427_10251067	bacteria	4.9e-30	424	625	201	FALSE	643	Bacteria/Proteobacteria/Gammaproteobacteria/Alteromonadales_Shewanellaceae
unbinned	3300031230.a:Ga0321427_10352512	bacteria	7.4e-119	2	521	519	TRUE	521	Bacteria/Bacteroidetes/Bacteroidia/Flavobacteriales/Flavobacteriaceae_1/uncultured
unbinned	3300031230.a:Ga0321427_11190130	bacteria	2.9e-06	4	118	114	FALSE	262	Bacteria/Proteobacteria/Gammaproteobacteria/Enterobacteriales_Enterobacteriaceae/Escherichia-Shigella_1
unbinned	3300031230.a:Ga0321427_10242343	bacteria	3.2e-51	425	657	232	TRUE	657	Bacteria/Proteobacteria/Gammaproteobacteria/Alteromonadales_Marinobacteraceae_Marinobacter
unbinned	3300031230.a:Ga0321427_10936766	bacteria	1.9e-62	1	294	293	TRUE	294	Bacteria/Proteobacteria/Gammaproteobacteria/Alteromonadales_2/Psychromonadaceae/Psychromonas
unbinned	3300031230.a:Ga0321427_10225992	bacteria	1.2e-28	519	686	167	FALSE	686	Bacteria/Proteobacteria/Alphaproteobacteria/Rhodobacterales_Rhodobacteraceae_1/uncultured
unbinned	3300031230.a:Ga0321427_10996329	bacteria	7.8e-67	1	287	286	TRUE	288	Bacteria/Proteobacteria/Alphaproteobacteria/Rhodobacterales_Rhodobacteraceae_1/uncultured
unbinned	3300031230.a:Ga0321427_10082245	bacteria	0	2	1255	1253	FALSE	1257	Bacteria/Cyanobacteria/Oxyphotobacteria/Synechococcales/Cyanobiaceae/Synechococcus CC9902
unbinned	3300031230.a:Ga0321427_10691095	bacteria	1.9e-34	48	351	303	FALSE	352	Bacteria/Proteobacteria/Alphaproteobacteria/Rickettsiales/Mitochondria
unbinned	3300031230.a:Ga0321427_10255010	bacteria	2.9e-13	502	636	134	TRUE	637	Bacteria/Proteobacteria/Gammaproteobacteria
unbinned	3300031230.a:Ga0321427_10196549	bacteria	5.4e-117	293	747	454	TRUE	747	Bacteria/Proteobacteria/Gammaproteobacteria/Pseudomonadales_Moraxellaceae
unbinned	3300031230.a:Ga0321427_10288081	bacteria	1.2e-10	520	588	68	FALSE	591	Bacteria/Proteobacteria/Gammaproteobacteria
unbinned	3300031230.a:Ga0321427_10244867	bacteria	5.8e-84	280	652	372	FALSE	653	Bacteria/Proteobacteria/Alphaproteobacteria/Rhodospirillales/AEGEAN-169 marine group
unbinned	3300031230.a:Ga0321427_10802814	bacteria	5.1e-88	1	320	319	TRUE	321	Bacteria/Proteobacteria/Gammaproteobacteria/Alteromonadales_2/Colwelliaceae/Colwellia_1
unbinned	3300031230.a:Ga0321427_10001595	bacteria	0	2326	3865	1539	FALSE	12654	Bacteria/Proteobacteria/Gammaproteobacteria/OM182 clade
unbinned	3300031230.a:Ga0321427_10803748	bacteria	9.9e-32	129	320	191	TRUE	321	Bacteria/Proteobacteria/Gammaproteobacteria/Alteromonadales_Shewanellaceae/Shewanella
unbinned	3300031230.a:Ga0321427_10509344	bacteria	7.5e-83	18	419	401	FALSE	419	Bacteria/Bacteroidetes/Bacteroidia/Flavobacteriales/Cryomorphaceae_1/NS10 marine group
unbinned	3300031230.a:Ga0321427_10195743	bacteria	1.2e-153	2	603	601	TRUE	749	Bacteria/Proteobacteria/Alphaproteobacteria/Rhodobacterales_Rhodobacteraceae_1/uncultured
unbinned	3300031230.a:Ga0321427_10798811	bacteria	7.5e-25	151	322	171	TRUE	322	Bacteria/Proteobacteria/Gammaproteobacteria/Enterobacteriales_Enterobacteriaceae/Candidatus Regiella
unbinned	3300031230.a:Ga0321427_10406011	bacteria	1.4e-28	302	477	175	TRUE	478	Bacteria/Bacteroidetes/Bacteroidia/Sphingobacteriales/Lentimicrobiaceae
unbinned	3300031230.a:Ga0321427_11190045	bacteria	7e-11	10	78	68	TRUE	272	Bacteria/Proteobacteria/Gammaproteobacteria
unbinned	3300031230.a:Ga0321427_10527308	bacteria	1.2e-88	1	411	410	TRUE	411	Bacteria/Bacteroidetes/Bacteroidia/Flavobacteriales/Flavobacteriaceae_1/Bizionia_2
unbinned	3300031230.a:Ga0321427_10419477	archaea	8.1e-50	2	468	466	TRUE	469	Bacteria/Proteobacteria/Gammaproteobacteria/Thiotrichales_Thiotrichaceae_2/uncultured
unbinned	3300031230.a:Ga0321427_10622188	bacteria	9.3e-86	25	374	349	FALSE	374	Bacteria/Proteobacteria/Gammaproteobacteria/OM182 clade
unbinned	3300031230.a:Ga0321427_10037524	bacteria	0	170	1661	1491	TRUE	1984	Bacteria/Proteobacteria/Alphaproteobacteria/SAR11 clade/Clade III
unbinned	3300031230.a:Ga0321427_10070508	bacteria	5.9e-35	1	196	195	FALSE	1375	Bacteria/Bacteroidetes/Bacteroidia/Sphingobacteriales/Lentimicrobiaceae
unbinned	3300031230.a:Ga0321427_10226391	bacteria	1.2e-77	1	373	372	TRUE	685	Bacteria/Proteobacteria/Gammaproteobacteria/Alteromonadales_2/Alteromonadaceae_1/Glaciecola_1
unbinned	3300031230.a:Ga0321427_10091411	bacteria	1.6e-288	24	1180	1156	FALSE	1182	Bacteria/Bacteroidetes/Rhodothermia/Balneolales_Balneolaceae/Balneola
unbinned	3300031230.a:Ga0321427_10408643	bacteria	8.7e-120	1	475	474	TRUE	476	Bacteria/Epsilonbacteraeota/Campylobacteria/Campylobacterales/Arcobacteraceae_Arcobacter
unbinned	3300031230.a:Ga0321427_11011979	bacteria	1.8e-27	109	287	178	FALSE	287	Bacteria/Proteobacteria/Gammaproteobacteria/Alteromonadales_Shewanellaceae/Shewanella
unbinned	3300031230.a:Ga0321427_10783643	bacteria	2.6e-78	2	326	324	TRUE	326	Bacteria/Proteobacteria/Gammaproteobacteria/Alteromonadales_2/Alteromonadaceae_1/Salinimonas
unbinned	3300031230.a:Ga0321427_10051622	bacteria	9.7e-260	612	1636	1024	FALSE	1648	Bacteria/Proteobacteria/Gammaproteobacteria/KI89A clade
unbinned	3300031230.a:Ga0321427_11118062	bacteria	5.3e-55	2	281	279	TRUE	281	Bacteria/Proteobacteria/Gammaproteobacteria/Oceanospirillales_Saccharospirillaceae
unbinned	3300031230.a:Ga0321427_10568519	bacteria	5.4e-95	1	394	393	FALSE	394	Bacteria/Bacteroidetes/Bacteroidia/Bacteroidales_1/Marinifilaceae_1/Marinifilum
unbinned	3300031230.a:Ga0321427_10863807	bacteria	2.2e-20	158	308	150	FALSE	308	Bacteria/Proteobacteria/Gammaproteobacteria/Alteromonadales_2/Idiomarinaceae/Idiomarina
unbinned	3300031230.a:Ga0321427_10887476	bacteria	2.3e-69	4	303	299	FALSE	303	Bacteria/Bacteroidetes/Bacteroidia/Flavobacteriales/Flavobacteriaceae_1/Pricia
unbinned	3300031230.a:Ga0321427_10564320	bacteria	2.7e-64	1	370	369	TRUE	396	Bacteria/Bacteroidetes/Bacteroidia/Bacteroidales_1/Bacteroidaceae_Bacteroides
unbinned	3300031230.a:Ga0321427_10011260	bacteria	0	2334	3866	1532	TRUE	3996	Bacteria/Bacteroidetes/Bacteroidia/Sphingobacteriales/NS11-12 marine group
unbinned	3300031230.a:Ga0321427_11101931	bacteria	4.2e-59	1	280	279	FALSE	282	Bacteria/Bacteroidetes/Bacteroidia/Cytophagales_1/Cyclobacteriaceae_2
unbinned	3300031230.a:Ga0321427_10069854	bacteria	7.6e-173	719	1382	663	TRUE	1383	Bacteria/Bacteroidetes/Bacteroidia/Flavobacteriales/NS9 marine group
unbinned	3300031230.a:Ga0321427_10046990	bacteria	3.3e-29	1561	1742	181	TRUE	1742	Bacteria/Bacteroidetes/Bacteroidia/Flavobacteriales/Flavobacteriaceae_1/Actibacter
unbinned	3300031230.a:Ga0321427_10008026	bacteria	0	3117	4646	1529	TRUE	4876	Bacteria/Bacteroidetes/Bacteroidia/Flavobacteriales/Flavobacteriaceae_1/Arenibacter
unbinned	3300031230.a:Ga0321427_10252963	bacteria	6.2e-175	1	640	639	TRUE	640	Bacteria/Proteobacteria/Gammaproteobacteria/Alteromonadales_2/Colwelliaceae/Colwellia_2
unbinned	3300031230.a:Ga0321427_10426116	bacteria	4.6e-96	68	464	396	TRUE	465	Bacteria/PAUC34f
unbinned	3300031230.a:Ga0321427_10358302	bacteria	1.1e-80	167	516	349	TRUE	516	Bacteria/Verrucomicrobia_Verrucomicrobiae/Opitutales/Puniceicoccaceae/MB11C04 marine group
unbinned	3300031230.a:Ga0321427_10859875	euk	1e-74	4	308	304	TRUE	309	Eukaryota/SAR_Alveolata/Protalveolata_Syndiniales/Syndiniales Group II
unbinned	3300031230.a:Ga0321427_10622807	bacteria	7.5e-90	1	373	372	TRUE	374	Bacteria/Bacteroidetes/Bacteroidia/Flavobacteriales/Flavobacteriaceae_1/Salegentibacter
unbinned	3300031230.a:Ga0321427_10851226	bacteria	1.2e-64	30	310	280	TRUE	310	Bacteria/Proteobacteria/Alphaproteobacteria/Rickettsiales/Mitochondria
unbinned	3300031230.a:Ga0321427_10232598	bacteria	4.2e-174	14	673	659	FALSE	674	Bacteria/Proteobacteria/Gammaproteobacteria/Oceanospirillales_1/Marinomonadaceae_Marinomonas
unbinned	3300031230.a:Ga0321427_10619114	bacteria	3.9e-55	46	375	329	FALSE	375	Bacteria/Bacteroidetes/Bacteroidia/Flavobacteriales/Flavobacteriaceae_1/Winogradskyella
unbinned	3300031230.a:Ga0321427_10281760	bacteria	1.9e-158	16	598	582	FALSE	599	Bacteria/Proteobacteria/Gammaproteobacteria/Alteromonadales_Marinobacteraceae_Marinobacter
unbinned	3300031230.a:Ga0321427_10333212	bacteria	1.5e-28	315	532	217	FALSE	540	Bacteria/Bacteroidetes/Bacteroidia/Bacteroidales_1/Prevotellaceae/Prevotellaceae UCG-003
unbinned	3300031230.a:Ga0321427_10129538	bacteria	3.3e-212	3	872	869	TRUE	961	Bacteria/Firmicutes_Bacilli/Bacillales_Planococcaceae_1
unbinned	3300031230.a:Ga0321427_10009938	bacteria	1e-44	2	226	224	FALSE	4290	Bacteria/Proteobacteria/Gammaproteobacteria/SAR86 clade
unbinned	3300031230.a:Ga0321427_10618976	bacteria	3e-106	2	376	374	TRUE	376	Bacteria/Bacteroidetes/Bacteroidia/Flavobacteriales/NS7 marine group
unbinned	3300031230.a:Ga0321427_11117892	bacteria	1.9e-58	1	272	271	TRUE	281	Bacteria/Proteobacteria/Gammaproteobacteria/Pseudomonadales_Moraxellaceae
unbinned	3300031230.a:Ga0321427_10047811	bacteria	0	61	1588	1527	TRUE	1724	Bacteria/Bacteroidetes/Bacteroidia/Flavobacteriales/NS9 marine group
unbinned	3300031230.a:Ga0321427_10339052	bacteria	1e-140	4	533	529	TRUE	534	Bacteria/Proteobacteria/Alphaproteobacteria/Micavibrionales/Micavibrionaceae/uncultured
unbinned	3300031230.a:Ga0321427_10384719	bacteria	2.9e-120	5	493	488	TRUE	494	Bacteria/Cyanobacteria/Oxyphotobacteria/Chloroplast
unbinned	3300031230.a:Ga0321427_10233165	bacteria	5.5e-17	527	673	146	TRUE	673	Bacteria/Bacteroidetes/Bacteroidia/Flavobacteriales/Flavobacteriaceae_1/Aquibacter
unbinned	3300031230.a:Ga0321427_10796389	bacteria	1.2e-43	1	304	303	TRUE	323	Bacteria/Epsilonbacteraeota/Campylobacteria/Campylobacterales/Arcobacteraceae_Arcobacter
unbinned	3300031230.a:Ga0321427_10954357	bacteria	5.4e-30	103	288	185	TRUE	291	Bacteria/Lentisphaerae/Lentisphaeria/Lentisphaerales_Lentisphaeraceae_Lentisphaera
unbinned	3300031230.a:Ga0321427_11016700	bacteria	2.2e-66	1	287	286	FALSE	287	Bacteria/Bacteroidetes/Bacteroidia/Flavobacteriales/Cryomorphaceae_3/uncultured
unbinned	3300031230.a:Ga0321427_10270099	bacteria	1.6e-155	4	614	610	FALSE	615	Bacteria/Verrucomicrobia_Verrucomicrobiae/Opitutales/Puniceicoccaceae/MB11C04 marine group
unbinned	3300031230.a:Ga0321427_10575953	bacteria	2.5e-30	185	386	201	FALSE	391	Bacteria/Proteobacteria/Gammaproteobacteria/Alteromonadales_1/Alteromonadaceae/Rheinheimera
unbinned	3300031230.a:Ga0321427_10315555	bacteria	6.6e-83	2	383	381	TRUE	558	Bacteria/Patescibacteria/Gracilibacteria/JGI 0000069-P22
unbinned	3300031230.a:Ga0321427_10591793	bacteria	1.4e-21	234	384	150	FALSE	385	Bacteria/Bacteroidetes/Bacteroidia
unbinned	3300031230.a:Ga0321427_11190133	bacteria	2.3e-16	2	127	125	TRUE	261	Bacteria/Proteobacteria/Gammaproteobacteria
unbinned	3300031230.a:Ga0321427_10074053	bacteria	6.3e-90	1	413	412	TRUE	1336	Bacteria/Patescibacteria/Gracilibacteria/JGI 0000069-P22
unbinned	3300031230.a:Ga0321427_10029510	archaea	0	712	2180	1468	FALSE	2277	Archaea/Euryarchaeota/Thermoplasmata/Marine Group II
unbinned	3300031230.a:Ga0321427_10906536	bacteria	5.5e-72	2	280	278	FALSE	299	Bacteria/Proteobacteria/Alphaproteobacteria/Rhodobacterales_Rhodobacteraceae_1/uncultured
unbinned	3300031230.a:Ga0321427_10110877	bacteria	3.8e-90	651	1054	403	FALSE	1054	Bacteria/Patescibacteria/Gracilibacteria/JGI 0000069-P22
unbinned	3300031230.a:Ga0321427_10645923	bacteria	1e-96	1	366	365	TRUE	366	Bacteria/Bacteroidetes/Bacteroidia/Flavobacteriales/Flavobacteriaceae_1
unbinned	3300031230.a:Ga0321427_10472123	bacteria	4.1e-19	2	131	129	TRUE	438	Bacteria/Proteobacteria/Alphaproteobacteria/Paracaedibacterales_Paracaedibacteraceae/uncultured
unbinned	3300031230.a:Ga0321427_10007794	bacteria	0	4	1373	1369	FALSE	4967	Bacteria/Proteobacteria/Alphaproteobacteria/Puniceispirillales/SAR116 clade
unbinned	3300031230.a:Ga0321427_10127035	bacteria	8.5e-286	1	970	969	FALSE	972	Bacteria/Proteobacteria/Alphaproteobacteria/Sphingomonadales_Sphingomonadaceae/uncultured
unbinned	3300031230.a:Ga0321427_10864696	bacteria	8.5e-23	1	161	160	FALSE	308	Bacteria/Proteobacteria/Gammaproteobacteria/SAR86 clade
unbinned	3300031230.a:Ga0321427_11177291	bacteria	2.1e-70	1	277	276	TRUE	278	Bacteria/Bacteroidetes/Bacteroidia/Flavobacteriales/Flavobacteriaceae_1/Pseudofulvibacter
unbinned	3300031230.a:Ga0321427_10110406	bacteria	2e-188	380	1057	677	TRUE	1057	Bacteria/Proteobacteria/Gammaproteobacteria/Pseudomonadales_Pseudomonadaceae/Pseudomonas_1
unbinned	3300031230.a:Ga0321427_10122020	bacteria	1.4e-202	145	986	841	FALSE	995	Bacteria/Proteobacteria/Gammaproteobacteria/Alteromonadales_2/Psychromonadaceae/Psychromonas
unbinned	3300031230.a:Ga0321427_10174147	bacteria	9.5e-16	1	115	114	TRUE	804	Bacteria/Proteobacteria/Gammaproteobacteria/Enterobacteriales_Enterobacteriaceae/Escherichia-Shigella_1
unbinned	3300031230.a:Ga0321427_10026235	bacteria	0	633	2182	1549	TRUE	2438	Bacteria/Planctomycetes/Planctomycetacia/Planctomycetales/Gimesiaceae/uncultured
unbinned	3300031230.a:Ga0321427_10676570	bacteria	1.1e-86	12	355	343	FALSE	356	Bacteria/Proteobacteria/Alphaproteobacteria/Puniceispirillales/uncultured
unbinned	3300031230.a:Ga0321427_11072522	bacteria	1.9e-15	1	119	118	TRUE	284	Bacteria/Proteobacteria/Gammaproteobacteria
unbinned	3300031230.a:Ga0321427_10600877	bacteria	1e-102	1	376	375	TRUE	382	Bacteria/Proteobacteria/Gammaproteobacteria/Salinisphaerales/Salinisphaeraceae_Salinisphaera
unbinned	3300031230.a:Ga0321427_10403001	bacteria	4.4e-19	2	150	148	TRUE	481	Bacteria/PAUC34f
unbinned	3300031230.a:Ga0321427_10194096	bacteria	7e-60	421	753	332	FALSE	753	Bacteria/Bacteroidetes/Bacteroidia/Flavobacteriales/Flavobacteriaceae_1/uncultured
unbinned	3300031230.a:Ga0321427_10009054	bacteria	1.7e-214	5	918	913	FALSE	4540	Bacteria/Cyanobacteria/Oxyphotobacteria/Chloroplast
unbinned	3300031230.a:Ga0321427_10794962	bacteria	4.7e-34	2	267	265	TRUE	323	Bacteria/Epsilonbacteraeota/Campylobacteria/Campylobacterales/Arcobacteraceae_Arcobacter
unbinned	3300031230.a:Ga0321427_10362973	bacteria	3.3e-23	2	149	147	TRUE	512	Bacteria/Actinobacteria/Acidimicrobiia/Microtrichales/Ilumatobacteraceae/Ilumatobacter
unbinned	3300031230.a:Ga0321427_11118245	bacteria	2.7e-60	1	280	279	TRUE	281	Bacteria/Actinobacteria/Actinobacteria/Propionibacteriales/Nocardioidaceae_1/Nocardioides_1
unbinned	3300031230.a:Ga0321427_10247688	bacteria	5.7e-12	12	82	70	TRUE	649	Bacteria/Proteobacteria
unbinned	3300031230.a:Ga0321427_10613405	bacteria	4.9e-11	289	357	68	FALSE	377	Bacteria/Proteobacteria/Gammaproteobacteria
unbinned	3300031230.a:Ga0321427_11181399	bacteria	8.5e-12	177	251	74	FALSE	278	Bacteria/Proteobacteria/Gammaproteobacteria
unbinned	3300031230.a:Ga0321427_10064811	bacteria	3e-292	343	1445	1102	FALSE	1446	Bacteria/Proteobacteria_Deltaproteobacteria/SAR324 clade(Marine group B)
unbinned	3300031230.a:Ga0321427_10809002	bacteria	1.3e-19	183	319	136	FALSE	320	Bacteria/Bacteroidetes/Bacteroidia/Sphingobacteriales/Lentimicrobiaceae
unbinned	3300031230.a:Ga0321427_11190090	bacteria	7.6e-49	3	247	244	FALSE	266	Bacteria/Epsilonbacteraeota/Campylobacteria/Campylobacterales/Arcobacteraceae_Arcobacter
unbinned	3300031230.a:Ga0321427_10498583	bacteria	1.1e-28	9	198	189	TRUE	424	Bacteria/Proteobacteria/Gammaproteobacteria/Alteromonadales_Shewanellaceae/Psychrobium
unbinned	3300031230.a:Ga0321427_10086944	bacteria	7.2e-51	2	245	243	FALSE	1216	Bacteria/Bacteroidetes/Bacteroidia/Flavobacteriales/Flavobacteriaceae_1/Formosa_3
unbinned	3300031230.a:Ga0321427_10546836	bacteria	1.6e-96	1	399	398	FALSE	403	Bacteria/Proteobacteria/Alphaproteobacteria/Thalassobaculales/Nisaeaceae/OM75 clade
unbinned	3300031230.a:Ga0321427_11021115	bacteria	3.6e-77	3	286	283	TRUE	287	Bacteria/Proteobacteria/Gammaproteobacteria/Alteromonadales_2/Alteromonadaceae_1/Alteromonas_1
unbinned	3300031230.a:Ga0321427_10080282	bacteria	0	36	1271	1235	FALSE	1274	Bacteria/Proteobacteria/Gammaproteobacteria/Vibrionales_Vibrionaceae/Vibrio_2
unbinned	3300031230.a:Ga0321427_10087824	bacteria	0	1	1163	1162	FALSE	1209	Bacteria/Proteobacteria/Gammaproteobacteria/Alteromonadales_2/Pseudoalteromonadaceae_1/Pseudoalteromonas
unbinned	3300031230.a:Ga0321427_10196593	bacteria	1e-191	1	741	740	FALSE	747	Bacteria/Bacteroidetes/Rhodothermia/Rhodothermales_Rhodothermaceae
unbinned	3300031230.a:Ga0321427_10548823	bacteria	7.2e-82	2	401	399	FALSE	402	Bacteria/Bacteroidetes/Bacteroidia/Flavobacteriales/Crocinitomicaceae/Crocinitomix
unbinned	3300031230.a:Ga0321427_10799596	bacteria	1.4e-84	4	322	318	TRUE	322	Bacteria/Proteobacteria/Gammaproteobacteria/Cellvibrionales/Halieaceae/OM60(NOR5) clade
unbinned	3300031230.a:Ga0321427_10122454	bacteria	2.9e-158	2	679	677	TRUE	993	Bacteria/Proteobacteria/Gammaproteobacteria/Oceanospirillales_Saccharospirillaceae/Oceaniserpentilla
unbinned	3300031230.a:Ga0321427_11124073	bacteria	1.8e-72	1	280	279	TRUE	281	Bacteria/Proteobacteria/Gammaproteobacteria/Cellvibrionales/Halieaceae/OM60(NOR5) clade
unbinned	3300031230.a:Ga0321427_10057878	bacteria	2.8e-174	1	669	668	FALSE	1542	Bacteria/Epsilonbacteraeota/Campylobacteria/Campylobacterales/Arcobacteraceae_Arcobacter
unbinned	3300031230.a:Ga0321427_10354622	bacteria	7.1e-127	1	518	517	FALSE	519	Bacteria/Proteobacteria/Alphaproteobacteria/Rhodobacterales_Rhodobacteraceae_1
unbinned	3300031230.a:Ga0321427_10987910	bacteria	3.6e-26	115	289	174	FALSE	289	Bacteria/Bacteroidetes/Bacteroidia/Flavobacteriales/Flavobacteriaceae_1
unbinned	3300031230.a:Ga0321427_10017744	bacteria	8.1e-252	2137	3064	927	FALSE	3064	Bacteria/Proteobacteria/Alphaproteobacteria/Rhodobacterales_Rhodobacteraceae_1/Ascidiaceihabitans
unbinned	3300031230.a:Ga0321427_10070942	bacteria	4.4e-246	391	1370	979	FALSE	1370	Bacteria/Proteobacteria/Gammaproteobacteria/Vibrionales_Vibrionaceae/Photobacterium_4
unbinned	3300031230.a:Ga0321427_10010658	bacteria	0	2585	4108	1523	TRUE	4121	Bacteria/Bacteroidetes/Bacteroidia/Flavobacteriales/Flavobacteriaceae_1/Mesonia_1
unbinned	3300031230.a:Ga0321427_10192683	bacteria	6.3e-51	524	756	232	TRUE	756	Bacteria/Proteobacteria/Gammaproteobacteria/Alteromonadales_2/Pseudoalteromonadaceae_1/Pseudoalteromonas
unbinned	3300031230.a:Ga0321427_10344221	bacteria	1.2e-136	3	523	520	TRUE	529	Bacteria/Proteobacteria/Gammaproteobacteria/KI89A clade
unbinned	3300031230.a:Ga0321427_10005770	bacteria	0	3813	5384	1571	TRUE	5923	Bacteria/Verrucomicrobia_Verrucomicrobiae/Pedosphaerales_Pedosphaeraceae/SCGC AAA164-E04
unbinned	3300031230.a:Ga0321427_10230360	bacteria	1.5e-151	1	670	669	TRUE	678	Bacteria/Bacteroidetes/Rhodothermia/Rhodothermales_Rhodothermaceae/Rubrivirga_1
unbinned	3300031230.a:Ga0321427_10667723	bacteria	1.7e-81	1	359	358	FALSE	359	Bacteria/Bacteroidetes/Bacteroidia/Flavobacteriales/NS9 marine group
unbinned	3300031230.a:Ga0321427_10795562	bacteria	2e-80	6	323	317	FALSE	323	Bacteria/Bacteroidetes/Bacteroidia/Flavobacteriales/Flavobacteriaceae_1/Marixanthomonas
unbinned	3300031230.a:Ga0321427_10228061	bacteria	6.3e-72	2	319	317	FALSE	682	Bacteria/Bacteroidetes/Bacteroidia/Flavobacteriales/Flavobacteriaceae_1/uncultured
unbinned	3300031230.a:Ga0321427_10847941	bacteria	4.9e-11	233	299	66	FALSE	311	Bacteria/Proteobacteria/Gammaproteobacteria
unbinned	3300031230.a:Ga0321427_10470656	bacteria	5.1e-67	1	312	311	FALSE	438	Bacteria/Bacteroidetes/Bacteroidia/Flavobacteriales/Flavobacteriaceae_1/Polaribacter 4
unbinned	3300031230.a:Ga0321427_10603085	bacteria	2.3e-46	1	278	277	TRUE	381	Bacteria/Proteobacteria/Gammaproteobacteria/Cellvibrionales/Halieaceae/OM60(NOR5) clade
unbinned	3300031230.a:Ga0321427_11163420	bacteria	1.4e-07	160	277	117	TRUE	279	Bacteria/Bacteroidetes/Bacteroidia/Bacteroidales_1/Marinilabiliaceae/uncultured
unbinned	3300031230.a:Ga0321427_10480803	bacteria	6.9e-99	27	432	405	TRUE	433	Bacteria/Epsilonbacteraeota/Campylobacteria/Campylobacterales/Thiovulaceae/Sulfurimonas
unbinned	3300031230.a:Ga0321427_10048336	bacteria	0	1	1244	1243	FALSE	1713	Bacteria/Proteobacteria/Alphaproteobacteria/Rickettsiales/Mitochondria
unbinned	3300031230.a:Ga0321427_10888957	bacteria	2.5e-10	223	291	68	FALSE	303	Bacteria/Patescibacteria/Gracilibacteria/JGI 0000069-P22
unbinned	3300031230.a:Ga0321427_10040750	bacteria	1e-229	2	962	960	TRUE	1892	Bacteria/Bacteroidetes/Bacteroidia/Flavobacteriales/Flavobacteriaceae_1/Bizionia_1
unbinned	3300031230.a:Ga0321427_10272875	bacteria	3.2e-166	2	605	603	TRUE	612	Bacteria/Proteobacteria/Gammaproteobacteria/Cellvibrionales/Cellvibrionaceae_3/Marinagarivorans
unbinned	3300031230.a:Ga0321427_10753580	bacteria	1e-17	186	334	148	TRUE	334	Bacteria/Proteobacteria/Gammaproteobacteria/Pasteurellales_Pasteurellaceae/Haemophilus_7
unbinned	3300031230.a:Ga0321427_10978001	archaea	3.9e-61	1	289	288	FALSE	289	Archaea/Euryarchaeota/Thermoplasmata/Marine Group II
unbinned	3300031230.a:Ga0321427_11001826	bacteria	3.2e-62	6	286	280	TRUE	288	Bacteria/Patescibacteria/Gracilibacteria/JGI 0000069-P22
unbinned	3300031230.a:Ga0321427_10142369	bacteria	1.4e-251	1	907	906	FALSE	908	Bacteria/Cyanobacteria/Oxyphotobacteria/Chloroplast
unbinned	3300031230.a:Ga0321427_11140649	bacteria	1.1e-43	1	280	279	FALSE	280	Bacteria/Epsilonbacteraeota/Campylobacteria/Campylobacterales/Sulfurospirillaceae_Sulfurospirillum
unbinned	3300031230.a:Ga0321427_10607382	bacteria	9.6e-19	235	376	141	FALSE	380	Bacteria/Proteobacteria/Gammaproteobacteria/Alteromonadales_1/Moritellaceae/Moritella
unbinned	3300031230.a:Ga0321427_10281161	bacteria	1.4e-162	1	599	598	TRUE	600	Bacteria/Bacteroidetes/Bacteroidia/Cytophagales_1/Flammeovirgaceae/Luteivirga
unbinned	3300031230.a:Ga0321427_10073154	bacteria	1.1e-136	807	1328	521	TRUE	1346	Bacteria/Actinobacteria/Acidimicrobiia/Microtrichales/Ilumatobacteraceae
unbinned	3300031230.a:Ga0321427_10036830	bacteria	9.1e-51	2	249	247	FALSE	2005	Bacteria/Bacteroidetes/Bacteroidia/Flavobacteriales/NS9 marine group
unbinned	3300031230.a:Ga0321427_11092501	euk	1.2e-13	201	282	81	FALSE	283	Eukaryota/Opisthokonta_Holozoa/Metazoa (Animalia)/Eumetazoa/Bilateria/uncultured
unbinned	3300031230.a:Ga0321427_11135917	bacteria	1.1e-68	1	280	279	FALSE	280	Bacteria/Bacteroidetes/Bacteroidia/Flavobacteriales/Flavobacteriaceae_1/NS4 marine group
unbinned	3300031230.a:Ga0321427_10067352	bacteria	0	1	1280	1279	FALSE	1413	Bacteria/Proteobacteria/Gammaproteobacteria/SAR86 clade
unbinned	3300031230.a:Ga0321427_10311190	bacteria	4.2e-103	93	551	458	FALSE	563	Bacteria/Proteobacteria/Gammaproteobacteria/Oceanospirillales_Alcanivoracaceae_Alcanivorax
unbinned	3300031230.a:Ga0321427_10006823	bacteria	0	1	1387	1386	TRUE	5363	Bacteria/Bacteroidetes/Bacteroidia/Flavobacteriales/Flavobacteriaceae_1
unbinned	3300031230.a:Ga0321427_11144425	archaea	8.8e-43	1	279	278	TRUE	280	Bacteria/Proteobacteria/Gammaproteobacteria/Vibrionales_Vibrionaceae/Vibrio_1
unbinned	3300031230.a:Ga0321427_10400336	bacteria	5.1e-12	1	114	113	TRUE	482	Bacteria/Proteobacteria/Gammaproteobacteria
unbinned	3300031230.a:Ga0321427_10457081	bacteria	8.5e-115	1	444	443	FALSE	446	Bacteria/Proteobacteria/Gammaproteobacteria/SS1-B-07-19
unbinned	3300031230.a:Ga0321427_10131856	bacteria	5.3e-137	420	937	517	TRUE	950	Bacteria/Proteobacteria/Gammaproteobacteria/Cellvibrionales/Halieaceae/OM60(NOR5) clade
unbinned	3300031230.a:Ga0321427_10370688	bacteria	4.2e-103	76	505	429	TRUE	506	Bacteria/Fusobacteria_Fusobacteriia_Fusobacteriales/Fusobacteriaceae/Fusobacterium_2
unbinned	3300031230.a:Ga0321427_10670324	bacteria	4.6e-31	139	335	196	FALSE	358	Bacteria/Proteobacteria/Gammaproteobacteria/Enterobacteriales_Enterobacteriaceae/Escherichia-Shigella_1
unbinned	3300031230.a:Ga0321427_11025314	bacteria	6.4e-57	1	284	283	TRUE	287	Bacteria/Bacteroidetes/Bacteroidia/Flavobacteriales/Flavobacteriaceae_1/Lutibacter
unbinned	3300031230.a:Ga0321427_10019469	bacteria	2.9e-87	2530	2908	378	FALSE	2908	Bacteria/Proteobacteria/Alphaproteobacteria/SAR11 clade/Clade I
unbinned	3300031230.a:Ga0321427_10800745	bacteria	3.1e-39	1	310	309	FALSE	322	Bacteria/Proteobacteria/Alphaproteobacteria/Rhodospirillales/Rhodospirillaceae/uncultured
unbinned	3300031230.a:Ga0321427_10005951	bacteria	0	199	1690	1491	FALSE	5818	Bacteria/Proteobacteria/Alphaproteobacteria/Puniceispirillales/SAR116 clade
unbinned	3300031230.a:Ga0321427_10461493	bacteria	6.5e-73	85	443	358	FALSE	443	Bacteria/Proteobacteria/Gammaproteobacteria/Oceanospirillales_Halomonadaceae
unbinned	3300031230.a:Ga0321427_11139992	archaea	2.2e-14	2	279	277	TRUE	280	Bacteria/Gemmatimonadetes/Gemmatimonadetes_Gemmatimonadales_Gemmatimonadaceae/uncultured
unbinned	3300031230.a:Ga0321427_10204706	bacteria	1.7e-77	347	728	381	FALSE	729	Bacteria/Epsilonbacteraeota/Campylobacteria/Campylobacterales/Arcobacteraceae_Arcobacter
unbinned	3300031230.a:Ga0321427_10464445	bacteria	3.1e-28	1	173	172	TRUE	442	Bacteria/Proteobacteria/Alphaproteobacteria/Rhodospirillales_Magnetospiraceae/uncultured
unbinned	3300031230.a:Ga0321427_10765291	archaea	1.5e-74	1	330	329	TRUE	331	Archaea/Euryarchaeota/Thermoplasmata/Marine Group II
unbinned	3300031230.a:Ga0321427_10563494	bacteria	4.2e-72	2	324	322	FALSE	396	Bacteria/Proteobacteria/Alphaproteobacteria/Rhodobacterales_Rhodobacteraceae_1/Planktomarina
unbinned	3300031230.a:Ga0321427_11190125	bacteria	9.1e-30	35	247	212	FALSE	262	Bacteria/Proteobacteria/Gammaproteobacteria/Alteromonadales_1/Alteromonadaceae/Rheinheimera
unbinned	3300031230.a:Ga0321427_11190126	bacteria	6.9e-30	16	227	211	TRUE	262	Bacteria/Proteobacteria/Gammaproteobacteria/Alteromonadales_1/Alteromonadaceae/Rheinheimera
unbinned	3300031230.a:Ga0321427_10441447	euk	1.4e-53	12	454	442	TRUE	455	Eukaryota/SAR
unbinned	3300031230.a:Ga0321427_10755810	bacteria	5.9e-63	1	333	332	TRUE	333	Bacteria/Proteobacteria/Gammaproteobacteria/Vibrionales_Vibrionaceae/Aliivibrio_1
unbinned	3300031230.a:Ga0321427_10167806	bacteria	3.1e-230	13	821	808	FALSE	822	Bacteria/Proteobacteria/Gammaproteobacteria/Oceanospirillales_Alcanivoracaceae_Alcanivorax
unbinned	3300031230.a:Ga0321427_10167807	bacteria	2e-231	1	822	821	FALSE	822	Bacteria/Proteobacteria/Gammaproteobacteria/Cellvibrionales/Porticoccaceae/SAR92 clade
unbinned	3300031230.a:Ga0321427_10863519	bacteria	1.2e-08	1	69	68	TRUE	308	Bacteria/Proteobacteria/Gammaproteobacteria/Alteromonadales_2/Alteromonadaceae_1/Alteromonas_1
unbinned	3300031230.a:Ga0321427_10155566	bacteria	1.5e-28	632	815	183	FALSE	861	Bacteria/Bacteroidetes/Bacteroidia/Flavobacteriales/Flavobacteriaceae_1/Gramella
unbinned	3300031230.a:Ga0321427_10495167	bacteria	5.6e-28	1	173	172	TRUE	426	Bacteria/Proteobacteria/Alphaproteobacteria/Rhodospirillales_Magnetospiraceae/uncultured
unbinned	3300031230.a:Ga0321427_10010882	bacteria	0	1730	3272	1542	TRUE	4078	Bacteria/Proteobacteria/Gammaproteobacteria/Betaproteobacteriales/Nitrosomonadaceae/IS-44
unbinned	3300031230.a:Ga0321427_10592181	bacteria	1.8e-100	1	385	384	FALSE	385	Bacteria/Proteobacteria/Alphaproteobacteria/Sphingomonadales_Sphingomonadaceae/Altererythrobacter_6
unbinned	3300031230.a:Ga0321427_11017193	bacteria	4.5e-43	1	287	286	FALSE	287	Bacteria/Epsilonbacteraeota/Campylobacteria/Campylobacterales/Arcobacteraceae_Arcobacter
unbinned	3300031230.a:Ga0321427_10231926	bacteria	9.4e-173	4	675	671	FALSE	675	Bacteria/Proteobacteria/Gammaproteobacteria/Alteromonadales_2/Psychromonadaceae/Psychromonas
unbinned	3300031230.a:Ga0321427_11031417	bacteria	5.4e-63	1	262	261	TRUE	286	Bacteria/Bacteroidetes/Bacteroidia/Flavobacteriales/Flavobacteriaceae_1/Mangrovimonas
unbinned	3300031230.a:Ga0321427_11190726	bacteria	5e-28	7	198	191	FALSE	207	Bacteria/Proteobacteria/Gammaproteobacteria/Alteromonadales_1/Alteromonadaceae/Rheinheimera
unbinned	3300031230.a:Ga0321427_10589071	bacteria	2.1e-96	4	363	359	TRUE	386	Bacteria/Proteobacteria/Gammaproteobacteria/Alteromonadales_2/Colwelliaceae/Colwellia_2
unbinned	3300031230.a:Ga0321427_10763880	archaea	7.4e-48	11	331	320	TRUE	331	Bacteria/Proteobacteria/Alphaproteobacteria/Rhodobacterales_Rhodobacteraceae_1/Roseobacter clade NAC11-7 lineage
unbinned	3300031230.a:Ga0321427_10861803	bacteria	7.1e-62	1	308	307	TRUE	308	Bacteria/Bacteroidetes/Bacteroidia/Flavobacteriales/Crocinitomicaceae/Crocinitomix
unbinned	3300031230.a:Ga0321427_11074455	bacteria	2.2e-30	2	186	184	TRUE	284	Bacteria/Proteobacteria/Alphaproteobacteria/Rhodobacterales_Rhodobacteraceae_1/Jannaschia_1
unbinned	3300031230.a:Ga0321427_11020906	bacteria	1.9e-52	39	285	246	TRUE	287	Bacteria/Bacteroidetes/Bacteroidia/Flavobacteriales/Flavobacteriaceae_1/Zeaxanthinibacter
unbinned	3300031230.a:Ga0321427_10072193	bacteria	3.7e-296	223	1352	1129	FALSE	1356	Bacteria/Proteobacteria/Gammaproteobacteria/Alteromonadales_1/Alteromonadaceae/Rheinheimera
unbinned	3300031230.a:Ga0321427_10005819	bacteria	0	616	2135	1519	FALSE	5892	Bacteria/Bacteroidetes/Bacteroidia/Flavobacteriales/Flavobacteriaceae_1/Flavobacterium_1
unbinned	3300031230.a:Ga0321427_10334388	bacteria	1e-20	384	539	155	FALSE	539	Bacteria/Proteobacteria/Gammaproteobacteria/Enterobacteriales_Enterobacteriaceae/Escherichia-Shigella_1
unbinned	3300031230.a:Ga0321427_10841262	bacteria	7.7e-56	2	267	265	TRUE	313	Bacteria/Proteobacteria/Alphaproteobacteria/Rickettsiales/Mitochondria
unbinned	3300031230.a:Ga0321427_10281973	bacteria	1.2e-60	2	289	287	FALSE	599	Bacteria/Bacteroidetes/Bacteroidia/Flavobacteriales/Flavobacteriaceae_1
unbinned	3300031230.a:Ga0321427_11190057	bacteria	6e-69	1	270	269	FALSE	271	Bacteria/Bacteroidetes/Bacteroidia/Flavobacteriales/Flavobacteriaceae_1/Bizionia_1
unbinned	3300031230.a:Ga0321427_10843966	archaea	6.8e-42	1	311	310	TRUE	312	Bacteria/Proteobacteria/Gammaproteobacteria/Oceanospirillales_Halomonadaceae
unbinned	3300031230.a:Ga0321427_10039130	bacteria	7e-45	1710	1936	226	TRUE	1937	Bacteria/Bacteroidetes/Bacteroidia/Flavobacteriales/Flavobacteriaceae_1/Tenacibaculum_2
unbinned	3300031230.a:Ga0321427_10245173	bacteria	3.1e-16	2	125	123	TRUE	653	Bacteria/Proteobacteria/Gammaproteobacteria/Enterobacteriales_Enterobacteriaceae/Escherichia-Shigella_1
unbinned	3300031230.a:Ga0321427_11153979	bacteria	3.4e-71	1	278	277	FALSE	279	Bacteria/Proteobacteria/Gammaproteobacteria/Cellvibrionales/Halieaceae/OM60(NOR5) clade
unbinned	3300031230.a:Ga0321427_10062738	bacteria	1.4e-291	2	1453	1451	FALSE	1473	Bacteria/Patescibacteria/Parcubacteria/Candidatus Campbellbacteria
unbinned	3300031230.a:Ga0321427_10061152	archaea	1.5e-41	303	1488	1185	TRUE	1494	Bacteria/Proteobacteria/Alphaproteobacteria/Rickettsiales/Mitochondria
unbinned	3300031230.a:Ga0321427_10361347	bacteria	7.2e-131	1	513	512	TRUE	513	Bacteria/Proteobacteria/Gammaproteobacteria/Ga0077536
unbinned	3300031230.a:Ga0321427_10673269	bacteria	2.5e-80	1	352	351	FALSE	357	Bacteria/Proteobacteria/Gammaproteobacteria/Alteromonadales_2/Alteromonadaceae_1/Salinimonas
unbinned	3300031230.a:Ga0321427_10231437	bacteria	9.4e-112	141	675	534	FALSE	676	Bacteria/Bacteroidetes/Bacteroidia/Flavobacteriales/NS9 marine group
unbinned	3300031230.a:Ga0321427_11152121	bacteria	5.7e-65	1	279	278	TRUE	280	Bacteria/Proteobacteria/Alphaproteobacteria/Rhodobacterales_Rhodobacteraceae_1/Roseobacter_1
unbinned	3300031230.a:Ga0321427_10428210	bacteria	5.2e-95	4	411	407	FALSE	463	Bacteria/Bacteroidetes/Bacteroidia/Flavobacteriales/Cryomorphaceae_1/NS10 marine group
unbinned	3300031230.a:Ga0321427_10036448	bacteria	5.4e-139	1373	2017	644	FALSE	2017	Bacteria/Bacteroidetes/Bacteroidia/Flavobacteriales/Flavobacteriaceae_1/Bizionia_1
unbinned	3300031230.a:Ga0321427_10525928	bacteria	2.9e-22	262	410	148	FALSE	412	Bacteria/Proteobacteria/Gammaproteobacteria/Alteromonadales_2/Colwelliaceae/Thalassotalea_2
unbinned	3300031230.a:Ga0321427_10962616	bacteria	4.8e-26	87	274	187	FALSE	290	Bacteria/Epsilonbacteraeota/Campylobacteria/Campylobacterales/Arcobacteraceae_Arcobacter
unbinned	3300031230.a:Ga0321427_10880782	bacteria	6.2e-32	4	166	162	TRUE	304	Bacteria/Proteobacteria/Alphaproteobacteria/Rhodobacterales_Rhodobacteraceae_1/uncultured
unbinned	3300031230.a:Ga0321427_10452623	euk	8.7e-114	2	435	433	FALSE	448	Eukaryota/SAR_Stramenopiles/MAST-3/MAST-3A
unbinned	3300031230.a:Ga0321427_10218008	bacteria	5.6e-173	4	701	697	FALSE	701	Bacteria/Bacteroidetes/Bacteroidia/Flavobacteriales/NS9 marine group
unbinned	3300031230.a:Ga0321427_10417669	bacteria	2.3e-124	1	467	466	FALSE	470	Bacteria/Actinobacteria/Actinobacteria/PeM15
unbinned	3300031230.a:Ga0321427_10163630	bacteria	8.5e-16	721	835	114	FALSE	835	Bacteria/Proteobacteria/Gammaproteobacteria/Enterobacteriales_Enterobacteriaceae/Escherichia-Shigella_1
unbinned	3300031230.a:Ga0321427_10631002	bacteria	2.3e-14	1	140	139	FALSE	371	Bacteria/Proteobacteria/Gammaproteobacteria/Alteromonadales_2/Pseudoalteromonadaceae_1/Pseudoalteromonas
unbinned	3300031230.a:Ga0321427_10885248	bacteria	1.8e-58	28	287	259	FALSE	303	Bacteria/Bacteroidetes/Bacteroidia/Flavobacteriales/Flavobacteriaceae_1
unbinned	3300031230.a:Ga0321427_10537937	bacteria	6.4e-81	1	400	399	TRUE	407	Bacteria/Fusobacteria_Fusobacteriia_Fusobacteriales/Fusobacteriaceae/Psychrilyobacter
unbinned	3300031230.a:Ga0321427_10692322	bacteria	8.4e-28	10	191	181	TRUE	351	Bacteria/Bacteroidetes/Bacteroidia/Flavobacteriales/Flavobacteriaceae_1/Salegentibacter
unbinned	3300031230.a:Ga0321427_10411931	bacteria	1.1e-109	1	474	473	FALSE	474	Bacteria/Verrucomicrobia_Verrucomicrobiae/Verrucomicrobiales/Rubritaleaceae/Rubritalea
unbinned	3300031230.a:Ga0321427_10348038	bacteria	3.8e-146	1	524	523	FALSE	525	Bacteria/Bacteroidetes/Bacteroidia/Flavobacteriales/Flavobacteriaceae_1
unbinned	3300031230.a:Ga0321427_10959521	bacteria	7e-48	57	290	233	TRUE	290	Bacteria/Proteobacteria/Gammaproteobacteria/Alteromonadales_2/Alteromonadaceae_1/Alteromonas_1
unbinned	3300031230.a:Ga0321427_10750245	bacteria	7.3e-55	27	331	304	TRUE	335	Bacteria/Proteobacteria/Alphaproteobacteria/Rickettsiales/Mitochondria
unbinned	3300031230.a:Ga0321427_10875502	bacteria	1.5e-67	1	305	304	FALSE	305	Bacteria/Proteobacteria/Gammaproteobacteria/Vibrionales_Vibrionaceae/Vibrio_1
unbinned	3300031230.a:Ga0321427_10368297	bacteria	4.4e-12	6	79	73	TRUE	508	Bacteria/Proteobacteria/Gammaproteobacteria/Betaproteobacteriales/Nitrosomonadaceae/Nitrosomonas
unbinned	3300031230.a:Ga0321427_10149906	archaea	4.5e-119	1	880	879	TRUE	880	Bacteria/Bacteroidetes/Bacteroidia/Flavobacteriales/Flavobacteriaceae_1/Gramella
unbinned	3300031230.a:Ga0321427_10066526	bacteria	1.6e-161	658	1424	766	FALSE	1424	Bacteria/Verrucomicrobia_Verrucomicrobiae/Verrucomicrobiales/DEV007
unbinned	3300031230.a:Ga0321427_11067166	bacteria	1.8e-07	225	284	59	FALSE	284	Bacteria/Proteobacteria/Gammaproteobacteria/Enterobacteriales_Enterobacteriaceae/Escherichia-Shigella_1
unbinned	3300031230.a:Ga0321427_10995067	bacteria	1.4e-64	1	286	285	FALSE	288	Bacteria/Epsilonbacteraeota/Campylobacteria/Campylobacterales/Arcobacteraceae_Arcobacter
unbinned	3300031230.a:Ga0321427_10019121	bacteria	0	1542	2937	1395	FALSE	2937	Bacteria/Bacteroidetes/Bacteroidia/Flavobacteriales/Flavobacteriaceae_1/NS2b marine group
unbinned	3300031230.a:Ga0321427_10560733	bacteria	1.5e-92	1	396	395	FALSE	397	Bacteria/Proteobacteria/Gammaproteobacteria/Vibrionales_Vibrionaceae/Vibrio_2
unbinned	3300031230.a:Ga0321427_10254638	bacteria	1.5e-28	2	180	178	FALSE	638	Bacteria/Proteobacteria/Gammaproteobacteria/Cellvibrionales/Porticoccaceae/C1-B045
unbinned	3300031230.a:Ga0321427_10273608	archaea	4.5e-75	3	610	607	FALSE	610	Bacteria/Bacteroidetes/Bacteroidia/Flavobacteriales/Flavobacteriaceae_1/Winogradskyella
unbinned	3300031230.a:Ga0321427_10477633	bacteria	3.9e-95	2	417	415	TRUE	435	Bacteria/Bacteroidetes/Bacteroidia/Bacteroidales_2/Prolixibacteraceae/Roseimarinus
unbinned	3300031230.a:Ga0321427_10816926	bacteria	9.5e-68	15	317	302	TRUE	318	Bacteria/Proteobacteria/Alphaproteobacteria/uncultured
unbinned	3300031230.a:Ga0321427_10843592	bacteria	5.9e-51	5	311	306	FALSE	312	Bacteria/Proteobacteria_Deltaproteobacteria/PB19
unbinned	3300031230.a:Ga0321427_11023840	bacteria	2.4e-30	7	199	192	TRUE	287	Bacteria/Proteobacteria/Gammaproteobacteria/Coxiellales_Coxiellaceae_Coxiella
unbinned	3300031230.a:Ga0321427_10702372	bacteria	6.6e-95	1	347	346	FALSE	348	Bacteria/Proteobacteria/Gammaproteobacteria/Pseudomonadales_Pseudomonadaceae/Pseudomonas_1
unbinned	3300031230.a:Ga0321427_10960735	bacteria	5.9e-77	2	290	288	FALSE	290	Bacteria/Proteobacteria/Gammaproteobacteria/Alteromonadales_2/Alteromonadaceae_1/Alteromonas_1
unbinned	3300031230.a:Ga0321427_10553038	euk	1.9e-26	19	401	382	FALSE	401	Bacteria/Epsilonbacteraeota/Campylobacteria/Campylobacterales/Sulfurospirillaceae_Sulfurospirillum
unbinned	3300031230.a:Ga0321427_10765229	euk	6.3e-64	2	325	323	TRUE	331	Eukaryota/Archaeplastida_Chloroplastida/Chlorophyta/Clade VII/Subclade A
unbinned	3300031230.a:Ga0321427_10088602	bacteria	1.1e-108	672	1203	531	FALSE	1203	Bacteria/Bacteroidetes/Bacteroidia/Flavobacteriales/Flavobacteriaceae_1/Aquibacter
unbinned	3300031230.a:Ga0321427_10877767	bacteria	1.7e-77	1	304	303	FALSE	305	Bacteria/Proteobacteria/Gammaproteobacteria/Salinisphaerales/Salinisphaeraceae_Salinisphaera
unbinned	3300031230.a:Ga0321427_10672966	bacteria	1.1e-80	1	316	315	TRUE	357	Bacteria/Proteobacteria/Gammaproteobacteria/Alteromonadales_2/Colwelliaceae/Colwellia_1
unbinned	3300031230.a:Ga0321427_10846595	bacteria	3.2e-22	1	174	173	TRUE	311	Bacteria/Proteobacteria/Gammaproteobacteria/Alteromonadales_1/Alteromonadaceae/Rheinheimera
unbinned	3300031230.a:Ga0321427_10649504	bacteria	7.7e-60	47	339	292	TRUE	365	Bacteria/Proteobacteria/Alphaproteobacteria/Rickettsiales/Mitochondria
unbinned	3300031230.a:Ga0321427_11046404	bacteria	1.5e-67	12	284	272	FALSE	285	Bacteria/Proteobacteria/Gammaproteobacteria/Alteromonadales_2/Psychromonadaceae/Psychromonas
unbinned	3300031230.a:Ga0321427_10399535	bacteria	5.9e-98	55	483	428	TRUE	483	Bacteria/Bacteroidetes/Bacteroidia/Bacteroidales_1/Bacteroidaceae_Bacteroides
unbinned	3300031230.a:Ga0321427_11082793	archaea	1e-56	2	282	280	FALSE	283	Archaea/Euryarchaeota/Thermoplasmata/Marine Group II
unbinned	3300031230.a:Ga0321427_10866529	bacteria	5.7e-66	2	307	305	FALSE	307	Bacteria/Bacteroidetes/Bacteroidia/Flavobacteriales/Flavobacteriaceae_1/Salegentibacter
unbinned	3300031230.a:Ga0321427_10073601	bacteria	3.4e-127	43	546	503	FALSE	1341	Bacteria/Bacteroidetes/Bacteroidia/Flavobacteriales/Flavobacteriaceae_1/uncultured
unbinned	3300031230.a:Ga0321427_10946124	bacteria	7e-62	2	293	291	FALSE	293	Bacteria/Bacteroidetes/Rhodothermia/Rhodothermales_Rhodothermaceae/Rubrivirga_1
unbinned	3300031230.a:Ga0321427_10740293	archaea	1.9e-28	1	336	335	TRUE	338	Bacteria/Bacteroidetes/Bacteroidia/Cytophagales_1/Cyclobacteriaceae_2
unbinned	3300031230.a:Ga0321427_10998925	bacteria	3.9e-22	87	285	198	TRUE	288	Archaea/Thaumarchaeota/Nitrososphaeria/Nitrosopumilales_Nitrosopumilaceae/Candidatus Nitrosoarchaeum
unbinned	3300031230.a:Ga0321427_10662999	bacteria	1.3e-83	1	343	342	FALSE	361	Bacteria/Fusobacteria_Fusobacteriia_Fusobacteriales/Fusobacteriaceae
unbinned	3300031230.a:Ga0321427_10065827	bacteria	1.7e-237	12	1018	1006	TRUE	1432	Bacteria/Bacteroidetes/Bacteroidia/Flavobacteriales/Flavobacteriaceae_1/Tenacibaculum_2
unbinned	3300031230.a:Ga0321427_10036747	bacteria	0	2	1420	1418	TRUE	2007	Bacteria/Bacteroidetes/Bacteroidia/Flavobacteriales/Flavobacteriaceae_1/NS4 marine group
unbinned	3300031230.a:Ga0321427_10015785	bacteria	0	666	2178	1512	TRUE	3279	Bacteria/Chloroflexi/Dehalococcoidia/SAR202 clade
unbinned	3300031230.a:Ga0321427_10426092	bacteria	2.3e-56	158	462	304	FALSE	465	Bacteria/Proteobacteria/Alphaproteobacteria/Rickettsiales/Mitochondria
unbinned	3300031230.a:Ga0321427_10087421	bacteria	6.3e-240	1	1023	1022	TRUE	1213	Bacteria/Verrucomicrobia_Verrucomicrobiae/Opitutales/Puniceicoccaceae/Pelagicoccus
unbinned	3300031230.a:Ga0321427_11138981	bacteria	3.5e-60	1	280	279	FALSE	280	Bacteria/Verrucomicrobia_Verrucomicrobiae/Opitutales/Puniceicoccaceae/Cerasicoccus
unbinned	3300031230.a:Ga0321427_10824294	bacteria	3.1e-76	17	316	299	FALSE	316	Bacteria/Proteobacteria/Gammaproteobacteria/Oceanospirillales_Alcanivoracaceae_Alcanivorax
unbinned	3300031230.a:Ga0321427_10978472	bacteria	1.1e-19	1	165	164	FALSE	289	Bacteria/Proteobacteria/Alphaproteobacteria/Rhodobacterales_Rhodobacteraceae_1/Thalassobius_3
unbinned	3300031230.a:Ga0321427_10948079	bacteria	5.5e-74	2	292	290	TRUE	292	Bacteria/Proteobacteria/Alphaproteobacteria/Sphingomonadales_Sphingomonadaceae/Sphingorhabdus_3
unbinned	3300031230.a:Ga0321427_10062389	bacteria	0	2	1250	1248	FALSE	1477	Bacteria/Bacteroidetes/Bacteroidia/Flavobacteriales/Cryomorphaceae_1/NS10 marine group
unbinned	3300031230.a:Ga0321427_10322801	bacteria	8.8e-38	339	550	211	FALSE	551	Bacteria/Proteobacteria/Alphaproteobacteria/Sphingomonadales_Sphingomonadaceae
unbinned	3300031230.a:Ga0321427_10831065	bacteria	2.1e-42	1	271	270	TRUE	315	Bacteria/Bacteroidetes/Bacteroidia/Flavobacteriales/Flavobacteriaceae_1/Polaribacter
unbinned	3300031230.a:Ga0321427_10302044	bacteria	1.6e-58	255	574	319	FALSE	574	Bacteria/Proteobacteria/Gammaproteobacteria/Salinisphaerales/Salinisphaeraceae_Salinisphaera
unbinned	3300031230.a:Ga0321427_11063947	bacteria	2.8e-31	51	250	199	FALSE	284	Bacteria/Proteobacteria/Gammaproteobacteria/Alteromonadales_2/Colwelliaceae/Colwellia_2
unbinned	3300031230.a:Ga0321427_10195840	bacteria	8.5e-64	3	301	298	FALSE	749	Bacteria/Proteobacteria/Alphaproteobacteria/Sneathiellales_Sneathiellaceae/AT-s3-44
unbinned	3300031230.a:Ga0321427_10451257	archaea	1.2e-76	2	449	447	TRUE	449	Bacteria/Bacteroidetes/Bacteroidia/Flavobacteriales/NS9 marine group
unbinned	3300031230.a:Ga0321427_10828577	bacteria	3.6e-11	214	289	75	FALSE	315	Bacteria/Proteobacteria/Gammaproteobacteria
unbinned	3300031230.a:Ga0321427_10450797	bacteria	2.7e-55	133	449	316	FALSE	449	Bacteria/Marinimicrobia (SAR406 clade)
unbinned	3300031230.a:Ga0321427_11190497	bacteria	2e-16	106	231	125	FALSE	232	Bacteria/Proteobacteria/Gammaproteobacteria/Enterobacteriales_Enterobacteriaceae/Enterobacter_2
unbinned	3300031230.a:Ga0321427_10988625	bacteria	8.3e-27	2	162	160	TRUE	289	Bacteria/Proteobacteria/Alphaproteobacteria/Micavibrionales/uncultured
unbinned	3300031230.a:Ga0321427_10009715	bacteria	1.9e-101	3913	4346	433	TRUE	4346	Bacteria/Bacteroidetes/Rhodothermia/Balneolales_Balneolaceae/Balneola
unbinned	3300031230.a:Ga0321427_10476406	bacteria	7.5e-111	1	435	434	TRUE	435	Bacteria/Epsilonbacteraeota/Campylobacteria/Campylobacterales/Arcobacteraceae_Arcobacter
unbinned	3300031230.a:Ga0321427_10092309	bacteria	1.9e-213	1	773	772	FALSE	1175	Bacteria/Proteobacteria/Gammaproteobacteria/Oceanospirillales_1/Nitrincolaceae
unbinned	3300031230.a:Ga0321427_11190014	bacteria	1e-75	1	272	271	FALSE	276	Bacteria/Proteobacteria/Gammaproteobacteria/Alteromonadales_Shewanellaceae
unbinned	3300031230.a:Ga0321427_10206558	bacteria	1.3e-49	479	723	244	TRUE	725	Bacteria/Epsilonbacteraeota/Campylobacteria/Campylobacterales/Arcobacteraceae_Arcobacter
unbinned	3300031230.a:Ga0321427_10083310	bacteria	1.1e-82	844	1247	403	FALSE	1247	Bacteria/Bacteroidetes/Bacteroidia/Flavobacteriales/Cryomorphaceae_1/NS10 marine group
unbinned	3300031230.a:Ga0321427_10275002	bacteria	1.2e-43	394	608	214	TRUE	608	Bacteria/Proteobacteria/Gammaproteobacteria/Vibrionales_Vibrionaceae/Vibrio_2
unbinned	3300031230.a:Ga0321427_10188962	bacteria	2.4e-210	2	765	763	TRUE	765	Bacteria/Epsilonbacteraeota/Campylobacteria/Campylobacterales/Arcobacteraceae_Arcobacter
unbinned	3300031230.a:Ga0321427_10093209	bacteria	1.6e-171	504	1168	664	TRUE	1168	Bacteria/Bacteroidetes/Bacteroidia/Flavobacteriales/Flavobacteriaceae_1/Gramella
unbinned	3300031230.a:Ga0321427_10886929	bacteria	7.2e-78	1	298	297	FALSE	303	Bacteria/Proteobacteria/Gammaproteobacteria/Alteromonadales_Shewanellaceae/Shewanella
unbinned	3300031230.a:Ga0321427_11181389	bacteria	7e-20	1	156	155	FALSE	278	Bacteria/Proteobacteria/Gammaproteobacteria/Alteromonadales_1
unbinned	3300031230.a:Ga0321427_10697539	bacteria	4.8e-98	2	350	348	TRUE	350	Bacteria/Proteobacteria/Alphaproteobacteria/Rhodobacterales_Rhodobacteraceae_1/uncultured
unbinned	3300031230.a:Ga0321427_11022168	bacteria	6.7e-30	16	215	199	TRUE	287	Bacteria/Proteobacteria/Gammaproteobacteria/Oceanospirillales_2/Endozoicomonadaceae/Endozoicomonas
unbinned	3300031230.a:Ga0321427_10098868	bacteria	0	1	1128	1127	FALSE	1128	Bacteria/Proteobacteria/Gammaproteobacteria/Oceanospirillales_Saccharospirillaceae/Oleispira
unbinned	3300031230.a:Ga0321427_10098867	bacteria	0	1	1127	1126	TRUE	1128	Bacteria/Proteobacteria/Gammaproteobacteria/Alteromonadales_2/Pseudoalteromonadaceae_1/Pseudoalteromonas
unbinned	3300031230.a:Ga0321427_10480597	bacteria	4.8e-19	290	430	140	FALSE	433	Bacteria/Proteobacteria/Gammaproteobacteria/Alteromonadales_2/Alteromonadaceae_1/Salinimonas
unbinned	3300031230.a:Ga0321427_11000924	bacteria	3.2e-74	16	284	268	TRUE	288	Bacteria/Bacteroidetes/Bacteroidia/Flavobacteriales/Flavobacteriaceae_1/Nonlabens
unbinned	3300031230.a:Ga0321427_11171666	bacteria	1.4e-53	3	247	244	TRUE	278	Bacteria/Bacteroidetes/Bacteroidia/Flavobacteriales/Crocinitomicaceae/uncultured
unbinned	3300031230.a:Ga0321427_11066342	bacteria	2.2e-29	87	276	189	FALSE	284	Bacteria/Proteobacteria/Gammaproteobacteria/Vibrionales_Vibrionaceae/Photobacterium_4
unbinned	3300031230.a:Ga0321427_10537064	bacteria	9.9e-39	148	407	259	FALSE	407	Bacteria/Proteobacteria/Alphaproteobacteria/Rickettsiales/Mitochondria
unbinned	3300031230.a:Ga0321427_10198313	bacteria	1.3e-202	1	729	728	TRUE	743	Bacteria/Proteobacteria/Gammaproteobacteria
unbinned	3300031230.a:Ga0321427_10898881	bacteria	1.8e-30	74	280	206	FALSE	301	Bacteria/Proteobacteria/Gammaproteobacteria/Enterobacteriales_Enterobacteriaceae/Escherichia-Shigella_1
unbinned	3300031230.a:Ga0321427_11053826	bacteria	1.4e-60	3	285	282	TRUE	285	Bacteria/Bacteroidetes/Bacteroidia/Flavobacteriales/NS9 marine group
unbinned	3300031230.a:Ga0321427_10037875	bacteria	9e-254	1	960	959	TRUE	1973	Bacteria/Actinobacteria/Actinobacteria/PeM15
unbinned	3300031230.a:Ga0321427_10739325	bacteria	6.6e-08	2	115	113	FALSE	338	Bacteria/Proteobacteria/Gammaproteobacteria/SAR86 clade
unbinned	3300031230.a:Ga0321427_10875096	bacteria	5.7e-61	1	303	302	FALSE	305	Bacteria/Epsilonbacteraeota/Campylobacteria/Campylobacterales/Arcobacteraceae_Arcobacter
unbinned	3300031230.a:Ga0321427_10021172	bacteria	0	1504	2768	1264	TRUE	2768	Bacteria/Epsilonbacteraeota/Campylobacteria/Campylobacterales/Arcobacteraceae_Arcobacter
unbinned	3300031230.a:Ga0321427_10190501	bacteria	8.5e-73	1	321	320	FALSE	762	Bacteria/Marinimicrobia (SAR406 clade)
unbinned	3300031230.a:Ga0321427_10482180	bacteria	2.9e-120	2	432	430	FALSE	432	Bacteria/Proteobacteria/Gammaproteobacteria/SAR86 clade
unbinned	3300031230.a:Ga0321427_11190081	bacteria	1.2e-56	2	267	265	TRUE	267	Bacteria/Patescibacteria/Gracilibacteria/JGI 0000069-P22
unbinned	3300031230.a:Ga0321427_11031142	bacteria	1.2e-75	1	286	285	TRUE	286	Bacteria/Proteobacteria/Gammaproteobacteria/Thiohalorhabdales_Thiohalorhabdaceae/Granulosicoccus
unbinned	3300031230.a:Ga0321427_10828724	bacteria	1.2e-68	2	311	309	FALSE	315	Bacteria/Proteobacteria/Gammaproteobacteria/Cellvibrionales/Halieaceae/OM60(NOR5) clade
unbinned	3300031230.a:Ga0321427_10906123	bacteria	1.9e-65	2	281	279	TRUE	299	Bacteria/Epsilonbacteraeota/Campylobacteria/Campylobacterales/Arcobacteraceae_Arcobacter
unbinned	3300031230.a:Ga0321427_10847970	bacteria	1.2e-65	1	308	307	FALSE	311	Bacteria/Bacteroidetes/Bacteroidia/Bacteroidales_2/Prolixibacteraceae/Draconibacterium
unbinned	3300031230.a:Ga0321427_10877509	bacteria	7.3e-72	3	305	302	FALSE	305	Bacteria/Bacteroidetes/Bacteroidia/Bacteroidales_1/Marinifilaceae_1/uncultured
unbinned	3300031230.a:Ga0321427_10237781	archaea	7e-44	8	539	531	FALSE	665	Eukaryota/SAR_Alveolata/Protalveolata_Syndiniales/Syndiniales Group II
unbinned	3300031230.a:Ga0321427_10309186	bacteria	9.9e-148	13	566	553	TRUE	566	Bacteria/PAUC34f
unbinned	3300031230.a:Ga0321427_10895198	archaea	1e-36	1	300	299	FALSE	301	Bacteria/Bacteroidetes/Bacteroidia/Flavobacteriales/Flavobacteriaceae_1/Bizionia_1
unbinned	3300031230.a:Ga0321427_10267378	bacteria	7e-23	4	142	138	TRUE	619	Bacteria/Proteobacteria/Gammaproteobacteria/Alteromonadales_Marinobacteraceae_Marinobacter
unbinned	3300031230.a:Ga0321427_10170534	bacteria	4.7e-217	38	814	776	TRUE	814	Bacteria/Proteobacteria/Gammaproteobacteria/Thiotrichales_Thiotrichaceae_2/uncultured
unbinned	3300031230.a:Ga0321427_11121508	bacteria	8.7e-39	1	280	279	TRUE	281	Bacteria/Proteobacteria/Gammaproteobacteria/Alteromonadales_1/Alteromonadaceae/Rheinheimera
unbinned	3300031230.a:Ga0321427_10288068	bacteria	1.8e-81	256	591	335	TRUE	591	Bacteria/Proteobacteria/Gammaproteobacteria/Ga0077536
unbinned	3300031230.a:Ga0321427_10383731	bacteria	5.2e-117	5	490	485	TRUE	495	Bacteria/Bacteroidetes/Bacteroidia/Flavobacteriales/Flavobacteriaceae_1
unbinned	3300031230.a:Ga0321427_10359278	bacteria	1.4e-137	5	515	510	TRUE	515	Bacteria/Proteobacteria/Alphaproteobacteria/Puniceispirillales/uncultured
unbinned	3300031230.a:Ga0321427_11126663	bacteria	4.4e-66	20	280	260	TRUE	281	Bacteria/Bacteroidetes/Bacteroidia/Flavobacteriales/Flavobacteriaceae_1
unbinned	3300031230.a:Ga0321427_11081253	bacteria	3.3e-18	1	103	102	TRUE	283	Bacteria/Proteobacteria/Gammaproteobacteria/Coxiellales_Coxiellaceae_Coxiella
unbinned	3300031230.a:Ga0321427_10366027	bacteria	2e-16	2	127	125	TRUE	509	Bacteria/Proteobacteria/Gammaproteobacteria
unbinned	3300031230.a:Ga0321427_10117982	bacteria	1.1e-135	2	504	502	FALSE	1016	Bacteria/Proteobacteria/Alphaproteobacteria/uncultured
unbinned	3300031230.a:Ga0321427_10061292	bacteria	2.5e-19	1	158	157	FALSE	1492	Bacteria/Proteobacteria/Gammaproteobacteria/Enterobacteriales_Enterobacteriaceae/Escherichia-Shigella_1
unbinned	3300031230.a:Ga0321427_11153056	bacteria	2.8e-79	2	280	278	TRUE	280	Bacteria/Proteobacteria/Gammaproteobacteria/Alteromonadales_2/Colwelliaceae/Colwellia_1
unbinned	3300031230.a:Ga0321427_10902469	bacteria	1.6e-60	2	296	294	FALSE	300	Bacteria/Proteobacteria/Gammaproteobacteria/Alteromonadales_1/Moritellaceae/Paramoritella
unbinned	3300031230.a:Ga0321427_10438949	bacteria	6.4e-45	232	456	224	TRUE	456	Bacteria/Proteobacteria/Gammaproteobacteria/Enterobacteriales_Enterobacteriaceae/Escherichia-Shigella_1
unbinned	3300031230.a:Ga0321427_10172007	euk	1.9e-144	2	805	803	TRUE	810	Eukaryota/Amoebozoa_Archamoebae_Incertae Sedis_Rhizomastix
unbinned	3300031230.a:Ga0321427_10443659	bacteria	2.1e-12	372	444	72	FALSE	454	Bacteria/Proteobacteria/Gammaproteobacteria/Enterobacteriales_Enterobacteriaceae/Escherichia-Shigella_1
unbinned	3300031230.a:Ga0321427_10854854	archaea	6.3e-28	1	310	309	TRUE	310	Bacteria/Cyanobacteria/Oxyphotobacteria/Chloroplast
unbinned	3300031230.a:Ga0321427_10669923	bacteria	2.3e-85	3	358	355	TRUE	358	Bacteria/Bacteroidetes/Bacteroidia/Flavobacteriales/Flavobacteriaceae_1/NS5 marine group
unbinned	3300031230.a:Ga0321427_10799160	bacteria	8.5e-39	2	212	210	FALSE	322	Bacteria/Epsilonbacteraeota/Campylobacteria/Campylobacterales/Thiovulaceae/Sulfurimonas
unbinned	3300031230.a:Ga0321427_11190200	bacteria	1.3e-41	37	255	218	TRUE	255	Bacteria/Proteobacteria/Gammaproteobacteria/Enterobacteriales_Enterobacteriaceae/Plesiomonas
unbinned	3300031230.a:Ga0321427_10022257	euk	0	924	2658	1734	TRUE	2685	Eukaryota/SAR_Alveolata/Protalveolata_Syndiniales/Syndiniales Group II
unbinned	3300031230.a:Ga0321427_10772083	bacteria	3.8e-21	203	325	122	FALSE	329	Bacteria/Proteobacteria/Gammaproteobacteria/SAR86 clade
unbinned	3300031230.a:Ga0321427_10827137	bacteria	1.2e-76	5	291	286	FALSE	316	Bacteria/Actinobacteria/Rubrobacteria_Rubrobacterales_Rubrobacteriaceae_Rubrobacter
unbinned	3300031230.a:Ga0321427_10447648	bacteria	1.1e-68	1	314	313	TRUE	451	Bacteria/Proteobacteria/Alphaproteobacteria/Puniceispirillales/uncultured
unbinned	3300031230.a:Ga0321427_10077262	bacteria	0	19	1303	1284	TRUE	1304	Bacteria/Fusobacteria_Fusobacteriia_Fusobacteriales/Fusobacteriaceae/Psychrilyobacter
unbinned	3300031230.a:Ga0321427_10461861	bacteria	6.8e-90	3	436	433	TRUE	443	Bacteria/Gemmatimonadetes/BD2-11 terrestrial group
unbinned	3300031230.a:Ga0321427_10010096	bacteria	0	2499	3986	1487	TRUE	4255	Bacteria/Proteobacteria/Alphaproteobacteria/Parvibaculales_Parvibaculaceae/uncultured
unbinned	3300031230.a:Ga0321427_10432754	archaea	2.1e-72	2	457	455	FALSE	460	Bacteria/Bacteroidetes/Bacteroidia/Flavobacteriales/Flavobacteriaceae_1/Aurantivirga
unbinned	3300031230.a:Ga0321427_10215061	bacteria	1.9e-55	394	707	313	FALSE	707	Bacteria/Proteobacteria/Gammaproteobacteria/Oceanospirillales_Saccharospirillaceae/uncultured
unbinned	3300031230.a:Ga0321427_10039034	bacteria	0	246	1742	1496	FALSE	1940	Bacteria/Proteobacteria/Alphaproteobacteria/Rhodospirillales/uncultured
unbinned	3300031230.a:Ga0321427_10128339	bacteria	4e-231	1	905	904	TRUE	966	Bacteria/Actinobacteria/Acidimicrobiia/Microtrichales/Microtrichaceae/Sva0996 marine group
unbinned	3300031230.a:Ga0321427_10035194	bacteria	1.9e-86	1649	2059	410	FALSE	2059	Bacteria/Proteobacteria/Gammaproteobacteria/Alteromonadales_Shewanellaceae/Psychrobium
unbinned	3300031230.a:Ga0321427_10637047	bacteria	7.3e-78	5	369	364	TRUE	369	Bacteria/Marinimicrobia (SAR406 clade)
unbinned	3300031230.a:Ga0321427_10096627	bacteria	4.5e-12	1	114	113	TRUE	1143	Bacteria/Proteobacteria/Gammaproteobacteria
unbinned	3300031230.a:Ga0321427_10883983	archaea	3.5e-44	3	304	301	FALSE	304	Bacteria/Proteobacteria/Gammaproteobacteria/Pseudomonadales_Moraxellaceae/Paraperlucidibaca
unbinned	3300031230.a:Ga0321427_11190114	bacteria	5.7e-11	14	82	68	TRUE	263	Bacteria/Proteobacteria/Gammaproteobacteria
unbinned	3300031230.a:Ga0321427_10090673	bacteria	0	3	1187	1184	TRUE	1187	Bacteria/Proteobacteria/Gammaproteobacteria/Alteromonadales_2/Alteromonadaceae_1/Glaciecola_2
unbinned	3300031230.a:Ga0321427_11190671	bacteria	6.2e-11	13	81	68	TRUE	214	Bacteria/Proteobacteria/Gammaproteobacteria
unbinned	3300031230.a:Ga0321427_10122161	bacteria	3.8e-273	5	993	988	FALSE	995	Bacteria/Proteobacteria/Alphaproteobacteria/Rhodospirillales_Magnetospiraceae/uncultured
unbinned	3300031230.a:Ga0321427_10801618	bacteria	8.7e-68	4	321	317	TRUE	322	Bacteria/Planctomycetes/Planctomycetacia/Pirellulales_Pirellulaceae/uncultured
unbinned	3300031230.a:Ga0321427_10093110	bacteria	1e-85	1	383	382	TRUE	1169	Bacteria/Cyanobacteria/Oxyphotobacteria/Chloroplast
unbinned	3300031230.a:Ga0321427_10057573	bacteria	3.9e-72	1186	1547	361	FALSE	1547	Bacteria/Proteobacteria/Gammaproteobacteria/Alteromonadales_1/Alteromonadaceae/Rheinheimera
unbinned	3300031230.a:Ga0321427_11190194	bacteria	1.2e-58	1	255	254	FALSE	255	Bacteria/Proteobacteria/Gammaproteobacteria/Vibrionales_Vibrionaceae/Vibrio_2
unbinned	3300031230.a:Ga0321427_10147723	bacteria	9.4e-194	1	742	741	FALSE	888	Bacteria/Proteobacteria/Alphaproteobacteria/Caulobacterales/Hyphomonadaceae/Hellea
unbinned	3300031230.a:Ga0321427_11190115	bacteria	3.3e-15	1	119	118	TRUE	263	Bacteria/Proteobacteria/Gammaproteobacteria
unbinned	3300031230.a:Ga0321427_10040504	bacteria	0	353	1832	1479	TRUE	1898	Bacteria/Proteobacteria/Alphaproteobacteria/SAR11 clade/Clade II
unbinned	3300031230.a:Ga0321427_10059531	bacteria	2.2e-230	548	1517	969	FALSE	1518	Bacteria/Bacteroidetes/Bacteroidia/Flavobacteriales/Flavobacteriaceae_1/NS5 marine group
