# Supplementary material for: A pipeline for targeted metagenomics of environmental bacteria
Source: Microbiome. 2020 Feb 15;8:21. doi: 10.1186/s40168-020-0790-7 (PMC7024552; doi:10.1186/s40168-020-0790-7)
Supplement: Supplementary file 22 — Additional file 21: Table S7. The KEGG mapper was used to check for presence of metabolic pathways in the sorted Vis6 MAGs. For each pathway it is indicated whether it was found completely or not. [file 40168_2020_790_MOESM21_ESM.xlsx]

## Sheet: Sheet1
Table S7: The KEGG mapper was used to check for presence of metabolic pathways in the sorted Vis6 MAGs. For each pathway it is indicated whether it was found completely or not.
Carbohydrate metabolism	complete
M00001 Glycolysis (Embden-Meyerhof pathway), glucose => pyruvate	yes
M00002 Glycolysis, core module involving three-carbon compounds	yes
M00004 Pentose phosphate pathway (Pentose phosphate cycle)	no
M00005 PRPP biosynthesis, ribose 5P => PRPP	yes
M00006 Pentose phosphate pathway, oxidative phase, glucose 6P => ribulose 5P	no
M00007 Pentose phosphate pathway, non-oxidative phase, fructose 6P => ribose 5P	yes
M00007 Pentose phosphate pathway, non-oxidative phase, fructose 6P => ribose 5P	yes
M00008 Entner-Doudoroff pathway, glucose-6P => glyceraldehyde-3P + pyruvate	no
M00009 Citrate cycle (TCA cycle, Krebs cycle)	yes
M00010 Citrate cycle, first carbon oxidation, oxaloacetate => 2-oxoglutarate	yes
M00011 Citrate cycle, second carbon oxidation, 2-oxoglutarate => oxaloacetate	yes
M00012 Glyoxylate cycle	no
M00013 Malonate semialdehyde pathway, propanoyl-CoA => acetyl-CoA	no
M00307 Pyruvate oxidation, pyruvate => acetyl-CoA	yes
M00308 Semi-phosphorylative Entner-Doudoroff pathway, gluconate => glycerate-3P	no
M00309 Non-phosphorylative Entner-Doudoroff pathway, gluconate/galactonate => glycerate	no
M00373 Ethylmalonyl pathway	no
M00532 Photorespiration	no
M00580 Pentose phosphate pathway, archaea, fructose 6P => ribose 5P	yes
M00633 Semi-phosphorylative Entner-Doudoroff pathway, gluconate/galactonate => glycerate-3P	no
M00740 Methylaspartate cycle	no
M00741 Propanoyl-CoA metabolism, propanoyl-CoA => succinyl-CoA	yes
Serine and threonine metabolism
M00020 Serine biosynthesis, glycerate-3P => serine	no
M00018 Threonine biosynthesis, aspartate => homoserine => threonine	no
M00555 Betaine biosynthesis, choline => betaine	no
Cysteine and methionine metabolism
M00021 Cysteine biosynthesis, serine => cysteine	no
M00338 Cysteine biosynthesis, homocysteine + serine => cysteine	no
M00609 Cysteine biosynthesis, methionine => cysteine	no
M00017 Methionine biosynthesis, apartate => homoserine => methionine	no
M00034 Methionine salvage pathway	no
M00035 Methionine degradation	yes
Branched-chain amino acid metabolism
M00019 Valine/isoleucine biosynthesis, pyruvate => valine / 2-oxobutanoate => isoleucine	no
M00036 Leucine degradation, leucine => acetoacetate + acetyl-CoA	no
M00432 Leucine biosynthesis, 2-oxoisovalerate => 2-oxoisocaproate	no
M00535 Isoleucine biosynthesis, pyruvate => 2-oxobutanoate	no
M00570 Isoleucine biosynthesis, threonine => 2-oxobutanoate => isoleucine	no
Lysine metabolism
M00016 Lysine biosynthesis, succinyl-DAP pathway, aspartate => lysine	no
M00525 Lysine biosynthesis, acetyl-DAP pathway, aspartate => lysine	no
M00526 Lysine biosynthesis, DAP dehydrogenase pathway, aspartate => lysine	no
M00527 Lysine biosynthesis, DAP aminotransferase pathway, aspartate => lysine	no
M00030 Lysine biosynthesis, AAA pathway, 2-oxoglutarate => 2-aminoadipate => lysine	no
M00433 Lysine biosynthesis, 2-oxoglutarate => 2-oxoadipate	no
M00031 Lysine biosynthesis, mediated by LysW, 2-aminoadipate => lysine	no
M00032 Lysine degradation, lysine => saccharopine => acetoacetyl-CoA	no
Arginine and proline metabolism
M00015 Proline biosynthesis, glutamate => proline	no
M00028 Ornithine biosynthesis, glutamate => ornithine	no
M00029 Urea cycle	no
M00763 Ornithine biosynthesis, mediated by LysW, glutamate => ornithine	no
M00844 Arginine biosynthesis, ornithine => arginine	no
M00845 Arginine biosynthesis, glutamate => acetylcitrulline => arginine	no
Histidine metabolism
M00026 Histidine biosynthesis, PRPP => histidine	no
Aromatic amino acid metabolism
M00022 Shikimate pathway, phosphoenolpyruvate + erythrose-4P => chorismate	no
M00023 Tryptophan biosynthesis, chorismate => tryptophan	no
M00024 Phenylalanine biosynthesis, chorismate => phenylalanine	no
M00025 Tyrosine biosynthesis, chorismate => tyrosine	no
M00040 Tyrosine biosynthesis, prephanate => pretyrosine => tyrosine	no
Other amino acid metabolism
M00033 Ectoine biosynthesis, aspartate => ectoine	no
Carboxylic acid metabolism
2-Oxocarboxylic acid chain extension	no
RM001 2-Oxocarboxylic acid chain extension by tricarboxylic acid pathway	no
2-Oxocarboxylic acid chain modification	no
RM002 Carboxyl to amino conversion using protective N-acetyl group (basic amino acid synthesis)	no
RM032 Carboxyl to amino conversion without using protective group	no
RM033 Branched-chain addition (branched-chain amino acid synthesis)	no
Fatty acid metabolism
M00082 Fatty acid biosynthesis, initiation	yes
M00083 Fatty acid biosynthesis, elongation	yes
M00086 beta-Oxidation, acyl-CoA synthesis	yes
M00087 beta-Oxidation	no
M00861 beta-Oxidation, peroxisome, VLCFA	no
Carboxylic acid metabolism
RM018 Beta oxidation in acyl-CoA degradation	no
RM020 Fatty acid synthesis using acetyl-CoA (reversal of RM018)	no
RM021 Fatty acid synthesis using malonyl-CoA	yes
Biosynthesis of secondary metabolites
M00370 Glucosinolate biosynthesis, tryptophan => glucobrassicin	no
Carbon fixation
M00165 Reductive pentose phosphate cycle (Calvin cycle)	no
M00166 Reductive pentose phosphate cycle, ribulose-5P => glyceraldehyde-3P	no
M00167 Reductive pentose phosphate cycle, glyceraldehyde-3P => ribulose-5P	yes
M00168 CAM (Crassulacean acid metabolism), dark	yes
M00169 CAM (Crassulacean acid metabolism), light	no
M00172 C4-dicarboxylic acid cycle, NADP - malic enzyme type	no
M00171 C4-dicarboxylic acid cycle, NAD - malic enzyme type	no
M00170 C4-dicarboxylic acid cycle, phosphoenolpyruvate carboxykinase type	no
M00173 Reductive citrate cycle (Arnon-Buchanan cycle)	no
M00376 3-Hydroxypropionate bi-cycle	no
M00375 Hydroxypropionate-hydroxybutylate cycle	no
M00374 Dicarboxylate-hydroxybutyrate cycle	no
M00377 Reductive acetyl-CoA pathway (Wood-Ljungdahl pathway)	no
M00579 Phosphate acetyltransferase-acetate kinase pathway, acetyl-CoA => acetate	no
M00620 no reductive citrate cycle, acetyl-CoA => oxoglutarate	no
Methane metabolism
M00567 Methanogenesis, CO2 => methane	no
M00357 Methanogenesis, acetate => methane	no
M00356 Methanogenesis, methanol => methane	no
M00563 Methanogenesis, methylamine/dimethylamine/trimethylamine => methane	no
M00174 Methane oxidation, methanotroph, methane => formaldehyde	no
M00346 Formaldehyde assimilation, serine pathway	no
M00345 Formaldehyde assimilation, ribulose monophosphate pathway	no
M00344 Formaldehyde assimilation, xylulose monophosphate pathway	no
M00608 2-Oxocarboxylic acid chain extension, 2-oxoglutarate => 2-oxoadipate => 2-oxopimelate => 2-oxosuberate	no
Nitrogen metabolism
M00175 Nitrogen fixation, nitrogen => ammonia	no
M00531 Assimilatory nitrate reduction, nitrate => ammonia	no
M00530 Dissimilatory nitrate reduction, nitrate => ammonia	no
M00529 Denitrification, nitrate => nitrogen	no
M00528 Nitrification, ammonia => nitrite	no
M00804 Complete nitrification, comammox, ammonia => nitrite => nitrate	no
Sulfur metabolism
M00176 Assimilatory sulfate reduction, sulfate => H2S	no
M00596 Dissimilatory sulfate reduction, sulfate => H2S	no
M00595 Thiosulfate oxidation by SOX complex, thiosulfate => sulfate	no
Lipopolysaccharide metabolism
M00060 Lipopolysaccharide biosynthesis, KDO2-lipid A	no
M00063 CMP-KDO biosynthesis	no
M00064 ADP-L-glycero-D-manno-heptose biosynthesis	no
M00080 Lipopolysaccharide biosynthesis, inner core => outer core => O-antigen	yes
Secondary metabolism
Aromatics degradation	no
Glycan metabolism
M00055 N-glycan precursor biosynthesis	no
M00072 N-glycosylation by oligosaccharyltransferase	no
M00073 N-glycan precursor trimming	no
M00074 N-glycan biosynthesis, high-mannose type	no
M00075 N-glycan biosynthesis, complex type	no
M00056 O-glycan biosynthesis, mucin type core	no
M00070 Glycosphingolipid biosynthesis, lacto-series, LacCer => Lc4Cer	no
M00071 Glycosphingolipid biosynthesis, neolacto-series, LacCer => nLc4Cer	no
M00068 Glycosphingolipid biosynthesis, globo-series, LacCer => Gb4Cer	no
M00069 Glycosphingolipid biosynthesis, ganglio series, LacCer => GT3	no
M00065 GPI-anchor biosynthesis, core oligosaccharide	no
Glycosaminoglycan metabolism
M00057 Glycosaminoglycan biosynthesis, linkage tetrasaccharide	no
M00058 Glycosaminoglycan biosynthesis, chondroitin sulfate backbone	no
M00059 Glycosaminoglycan biosynthesis, heparan sulfate backbone	no
M00076 Dermatan sulfate degradation	no
M00077 Chondroitin sulfate degradation	no
M00078 Heparan sulfate degradation	no
M00079 Keratan sulfate degradation	no
Terpenoid backbone biosynthesis
M00095 C5 isoprenoid biosynthesis, mevalonate pathway	no
M00096 C5 isoprenoid biosynthesis, non-mevalonate pathway	no
M00364 C10-C20 isoprenoid biosynthesis, bacteria	yes
M00367 C10-C20 isoprenoid biosynthesis, non-plant eukaryotes	yes
Sterol biosynthesis
M00101 Cholesterol biosynthesis, squalene 2,3-epoxide => cholesterol	no
M00102 Ergocalciferol biosynthesis	no
M00103 Cholecalciferol biosynthesis	no
M00104 Bile acid biosynthesis, cholesterol => cholate/chenodeoxycholate	no
M00106 Conjugated bile acid biosynthesis, cholate => taurocholate/glycocholate	no
M00862 beta-Oxidation, peroxisome, tri/dihydroxycholestanoyl-CoA => choloyl/chenodeoxycholoyl-CoA	no
M00107 Steroid hormone biosynthesis, cholesterol => prognenolone => progesterone	no
M00108 C21-Steroid hormone biosynthesis, progesterone => corticosterone/aldosterone	no
M00109 C21-Steroid hormone biosynthesis, progesterone => cortisol/cortisone	no
M00110 C19/C18-Steroid hormone biosynthesis, pregnenolone => androstenedione => estrone	no
Other terpenoid biosynthesis
M00097 beta-Carotene biosynthesis, GGAP => beta-carotene	no
M00372 Abscisic acid biosynthesis, beta-carotene => abscisic acid	no
Nucleotide and amino acid metabolism
Purine metabolism
M00048 Inosine monophosphate biosynthesis, PRPP + glutamine => IMP	yes
M00049 Adenine ribonucleotide biosynthesis, IMP => ADP,ATP	yes
M00050 Guanine ribonucleotide biosynthesis IMP => GDP,GTP	yes
M00546 Purine degradation, xanthine => urea	no
Pyrimidine metabolism
M00051 Uridine monophosphate biosynthesis, glutamine (+ PRPP) => UMP	yes
M00052 Pyrimidine ribonucleotide biosynthesis, UMP => UDP/UTP,CDP/CTP	yes
M00053 Pyrimidine deoxyribonuleotide biosynthesis, CDP/CTP => dCDP/dCTP,dTDP/dTTP	no
M00046 Pyrimidine degradation, uracil => beta-alanine, thymine => 3-aminoisobutanoate	no
Reaction modules
Carboxylic acid metabolism
RM018 Beta oxidation in acyl-CoA degradation	no
RM020 Fatty acid synthesis using acetyl-CoA (reversal of RM018)	no
Acyl-CoA metabolism
RM019 Acyl-CoA conversion via dicarboxylate semialdehyde	no
2-Oxocarboxylic acid chain modification
RM030 Glucosinolate synthesis	no
RG001 Reductive amination of 2-oxocarboxylic acid (aminotransferase reaction)	no
Cofactor and vitamin biosynthesis
M00112 Tocopherol/tocotorienol biosynthesis	no
M00114 Ascorbate biosynthesis, plants, glucose-6P => ascorbate	no
M00115 NAD biosynthesis, aspartate => NAD	no
M00116 Menaquinone biosynthesis, chorismate => menaquinol	no
M00117 Ubiquinone biosynthesis, prokaryotes, chorismate => ubiquinone	no
M00118 Glutathione biosynthesis, glutamate => glutathione	no
M00119 Pantothenate biosynthesis, valine/L-aspartate => pantothenate	no
M00120 Coenzyme A biosynthesis, pantothenate => CoA	yes
M00121 Heme biosynthesis, glutamate => heme	no
M00122 Cobalamin biosynthesis, cobinamide => cobalamin	no
M00123 Biotin biosynthesis, pimeloyl-ACP/CoA => biotin	no
M00124 Pyridoxal biosynthesis, erythrose-4P => pyridoxal-5P	no
M00125 Riboflavin biosynthesis, GTP => riboflavin/FMN/FAD	no
M00126 Tetrahydrofolate biosynthesis, GTP => THF	no
M00127 Thiamine biosynthesis, AIR => thiamine-P/thiamine-2P	no
M00128 Ubiquinone biosynthesis, eukaryotes, 4-hydroxybenzoate => ubiquinone	no
M00129 Ascorbate biosynthesis, animals, glucose-1P => ascorbate	no
M00140 C1-unit interconversion, prokaryotes	yes
M00141 C1-unit interconversion, eukaryotes	yes
M00550 Ascorbate degradation, ascorbate => D-xylulose-5P	no
M00572 Pimeloyl-ACP biosynthesis, BioC-BioH pathway, malonyl-ACP => pimeloyl-ACP	no
M00573 Biotin biosynthesis, BioI pathway, long-chain-acyl-ACP => pimeloyl-ACP => biotin	no
M00577 Biotin biosynthesis, BioW pathway, pimelate => pimeloyl-CoA => biotin	no
M00622 Nicotinate degradation, nicotinate => fumarate	no
M00836 Coenzyme F430 biosynthesis, sirohydrochlorin => coenzyme F430	no
M00840 Tetrahydrofolate biosynthesis, mediated by ribA and trpF, GTP => THF	no
M00841 Tetrahydrofolate biosynthesis, mediated by PTPS, GTP => THF	no
M00842 Tetrahydrobiopterin biosynthesis, GTP => BH4	no
M00843 L-threo-Tetrahydrobiopterin biosynthesis, GTP => L-threo-BH4	no
M00846 Siroheme biosynthesis, glutamate => siroheme	no
Polyamine biosynthesis
M00133 Polyamine biosynthesis, arginine => agmatine => putrescine => spermidine	no
M00134 Polyamine biosynthesis, arginine => ornithine => putrescine	no
M00135 GABA biosynthesis, eukaryotes, putrescine => GABA	no
M00136 GABA biosynthesis, prokaryotes, putrescine => GABA	no
Secondary metabolism
Aromatics degradation
M00537 Xylene degradation, xylene => methylbenzoate	no
M00551 Benzoate degradation, benzoate => catechol / methylbenzoate => methylcatechol	no
M00568 Catechol ortho-cleavage, catechol => 3-oxoadipate	no
M00569 Catechol meta-cleavage, catechol => acetyl-CoA / 4-methylcatechol => propanoyl-CoA	no
M00544 Carbazole degradation, carbazole => 2-oxopent-4-enoate + anthranilate	no
M00418 Toluene degradation, anaerobic, toluene => benzoyl-CoA	no
M00541 Benzoyl-CoA degradation, benzoyl-CoA => 3-hydroxypimeloyl-CoA	no
M00534 Naphthalene degradation, naphthalene => salicylate	no
M00624 Terephthalate degradation, terephthalate => 3,4-dihydroxybenzoate	no
M00623 Phthalate degradation, phthalate => protocatechuate	no
Biosynthesis of secondary metabolites
M00039 Monolignol biosynthesis, phenylalanine / tyrosine => monolignol	no
M00137 Flavanone biosynthesis, phenylalanine => naringenin	no
M00138 Flavonoid biosynthesis, naringenin => pelargonidin	no
M00661 Paspaline biosynthesis, geranylgeranyl-PP + indoleglycerol phosphate => paspaline	no
Mannose <--> Fructose	yes
