# Supplementary material for: A pipeline for targeted metagenomics of environmental bacteria
Source: Microbiome. 2020 Feb 15;8:21. doi: 10.1186/s40168-020-0790-7 (PMC7024552; doi:10.1186/s40168-020-0790-7)
Supplement: Supplementary file 24 — Additional file 23: Table S9. Presence absence of ortholog groups (og) of the 10 Vis6 MAGs from the sorts (B-K), the Vis6 MAG from the bulk metagenome (L) and five reference strains with IMG accession number (M-Q). Column R is the sum of the sorted MAGs (B-K). [file 40168_2020_790_MOESM23_ESM.xlsx]

## Sheet: Sheet1
Table S9: Presence absence of ortholog groups (og) of the 10 Vis6 MAGs from the sorts (B-K), the Vis6 MAG from the bulk metagenome (L) and five reference strains with IMG accession number (M-Q). Column R is the sum of the sorted MAGs (B-K).
og_id	IMG_266_1.contigs	IMG_345_1.contigs	IMG_347_1.contigs	IMG_348_1.contigs	IMG_349_1.contigs	IMG_373_1.contigs	IMG_402_1.contigs	IMG_407_1.contigs	IMG_429_1.contigs	IMG_440_1.contigs	bulk_metagenome_bin_28	Owenweeksia_honkongensis_2508501098	Draft_genome_Lake_Mendota_2582580543	Ca_Sulcia_muelleri_2630968813	Moheibacter_sediminis_2718217654	Ca_Sulcia_muelleri_2718218185	Sorted MAGs, sum
OG0000970	0	1	1	1	1	0	1	1	1	1	0	1	1	0	1	0	8
OG0000658	1	1	0	0	0	0	0	1	1	0	1	1	1	0	0	0	4
OG0001538	1	0	0	1	1	1	1	1	0	0	1	1	0	0	0	0	6
OG0001515	0	0	0	1	1	0	1	1	0	1	0	1	1	1	1	0	5
OG0000407	1	0	1	1	1	1	0	1	1	0	1	1	1	1	1	1	7
OG0000404	1	1	1	0	1	1	1	1	1	0	1	1	1	1	1	0	8
OG0001352	1	0	0	0	1	1	0	1	1	0	1	1	1	0	1	0	5
OG0000719	0	1	1	1	0	1	1	1	1	0	0	1	1	1	1	1	7
OG0001782	1	0	0	0	1	0	1	1	1	0	1	1	0	0	0	0	5
OG0000091	1	1	1	1	1	1	1	1	1	1	1	1	1	1	1	0	10
OG0001496	0	1	1	0	0	0	1	1	1	0	1	1	1	0	1	0	5
OG0000945	1	1	0	1	1	1	1	1	1	0	1	1	0	0	1	0	8
OG0001544	1	0	0	0	1	1	1	0	1	1	0	1	0	0	1	0	6
OG0000244	1	1	1	1	0	1	1	1	1	1	1	1	1	0	1	0	9
OG0000995	0	0	1	1	1	1	1	1	1	0	1	1	1	0	1	0	7
OG0001148	1	1	1	0	0	1	1	1	1	0	1	1	0	0	1	0	7
OG0000448	1	1	1	1	1	1	0	1	1	0	1	1	1	0	1	0	8
OG0001449	1	1	0	0	1	1	0	1	1	0	1	1	0	0	1	0	6
OG0000065	1	1	1	1	1	1	1	1	1	1	1	1	1	1	1	1	10
OG0000250	1	1	0	1	1	1	1	1	1	1	0	1	1	0	0	0	9
OG0000298	1	1	1	1	0	1	1	1	1	0	1	1	1	1	1	1	8
OG0000817	1	0	0	1	1	1	1	1	1	0	1	1	1	0	1	0	7
OG0001627	1	1	0	0	0	0	1	1	1	0	1	1	1	0	0	0	5
OG0000371	1	1	0	1	1	1	1	1	1	1	1	1	1	0	1	0	9
OG0002281	1	0	0	0	0	0	0	0	0	0	0	0	1	0	0	0	1
OG0000191	1	1	1	1	1	1	1	1	1	0	1	1	1	1	1	1	9
OG0001145	1	0	0	0	1	1	0	1	1	1	1	1	1	0	1	0	6
OG0000057	1	0	1	1	1	1	0	1	1	1	1	1	1	0	1	0	8
OG0000721	0	1	0	1	0	1	1	1	0	1	1	1	1	1	1	1	6
OG0000036	1	1	1	1	1	1	1	1	1	1	1	1	1	0	1	0	10
OG0001733	1	1	0	1	1	1	0	1	1	0	0	0	0	0	0	0	7
OG0001546	1	0	1	1	1	0	0	1	0	0	1	1	1	0	0	0	5
OG0001271	0	0	0	1	1	1	1	1	1	0	1	1	1	0	1	0	6
OG0000797	1	1	0	1	1	1	1	1	1	1	1	0	0	0	1	0	9
OG0001175	1	1	0	1	1	1	1	1	1	1	1	0	0	0	0	0	9
OG0000659	1	1	0	1	0	1	1	1	1	1	1	1	1	0	1	0	8
OG0002091	0	0	0	0	1	0	0	0	1	1	1	0	0	0	0	0	3
OG0000724	0	1	1	1	0	1	1	1	1	1	1	1	1	0	1	0	8
OG0000480	1	0	1	1	1	1	1	1	1	0	1	0	0	0	0	0	8
OG0000704	0	1	0	1	0	1	1	1	0	1	1	1	0	1	1	1	6
OG0000007	0	1	1	1	1	1	1	1	1	1	1	1	1	1	1	1	9
OG0000360	1	0	1	1	1	1	1	1	1	0	1	1	1	0	1	0	8
OG0001643	0	1	1	0	0	0	1	1	1	1	0	1	0	0	0	0	6
OG0000708	0	1	0	1	1	1	1	1	1	0	1	1	0	0	1	0	7
OG0002339	0	0	0	0	0	0	0	1	0	0	0	0	1	0	0	0	1
OG0000912	1	0	0	1	1	1	1	1	1	1	0	1	1	0	1	0	8
OG0001003	0	0	0	1	1	1	1	1	1	0	1	1	1	0	1	0	6
OG0001277	0	0	0	1	0	1	1	1	0	1	1	1	0	1	1	1	5
OG0000112	1	0	0	1	1	1	0	1	1	1	1	1	1	1	1	1	7
OG0000734	0	0	0	1	1	1	1	1	1	1	1	1	1	0	1	0	7
OG0001693	0	0	0	1	1	1	1	1	1	0	1	1	0	0	0	0	6
OG0000417	1	0	0	1	1	1	1	1	1	1	1	1	0	0	1	0	8
OG0001270	0	0	0	1	1	1	1	1	1	0	1	1	1	0	1	0	6
OG0001223	0	1	0	1	1	1	1	0	1	0	1	1	1	0	0	0	6
OG0000082	1	1	0	1	1	1	1	1	1	1	0	1	1	0	1	0	9
OG0001278	0	0	0	1	1	0	1	1	1	1	1	1	1	0	1	0	6
OG0001526	0	0	0	0	1	1	0	1	1	1	1	1	1	0	1	0	5
OG0001761	1	0	0	1	1	0	1	0	1	1	1	0	0	0	0	0	6
OG0001639	0	1	0	1	0	1	0	1	1	0	0	1	1	0	1	0	5
OG0002771	0	0	0	0	0	1	0	0	0	0	0	0	0	0	0	0	1
OG0001195	0	1	0	1	0	1	1	1	1	0	1	1	1	0	1	0	6
OG0000005	0	1	0	0	0	1	1	1	1	1	1	1	1	0	1	0	6
OG0001563	1	1	0	1	0	1	1	1	1	0	1	0	0	0	0	0	7
OG0000325	1	1	0	0	1	1	1	1	1	1	1	1	0	0	1	0	8
OG0001648	0	1	0	1	1	1	1	1	1	0	0	1	0	0	0	0	7
OG0002109	0	0	0	0	0	0	1	1	1	1	0	0	0	0	0	0	4
OG0000170	1	0	0	1	1	1	0	1	1	1	1	1	1	1	1	1	7
OG0001841	0	0	0	0	0	1	1	1	1	0	1	1	1	0	0	0	4
OG0001087	1	1	0	1	1	1	1	1	1	0	1	1	0	0	0	0	8
OG0000971	0	1	0	1	1	0	1	1	1	1	0	1	1	0	1	0	7
OG0001455	0	1	0	1	0	1	1	0	1	0	1	1	1	0	1	0	5
OG0000699	0	1	0	0	1	1	0	1	1	1	1	1	1	1	1	1	6
OG0000258	1	0	1	1	1	1	0	1	1	1	1	1	1	1	1	1	8
OG0001465	0	1	0	0	1	1	1	1	1	0	0	1	1	0	1	0	6
OG0001953	1	0	0	0	0	1	0	1	1	0	1	0	0	0	0	0	4
OG0001299	1	0	0	0	0	1	1	1	1	0	1	1	1	0	1	0	5
OG0002165	0	0	0	1	1	0	0	0	1	0	0	0	0	0	0	0	3
OG0001874	1	1	0	0	1	1	1	1	0	0	0	0	0	0	0	0	6
OG0000978	0	1	0	0	1	1	1	1	1	1	1	1	0	0	1	0	7
OG0001714	0	0	0	0	1	1	0	1	1	1	1	1	0	0	1	0	5
OG0000600	1	1	1	1	1	1	1	1	1	0	1	0	0	0	1	0	9
OG0001272	0	0	0	1	1	1	1	0	1	1	1	1	1	0	1	0	6
OG0001266	0	0	1	1	1	1	1	1	1	0	1	1	0	0	1	0	7
OG0002284	1	0	0	0	0	1	0	0	0	0	0	0	0	0	0	0	2
OG0000033	1	0	0	1	1	1	1	1	1	1	0	1	0	0	0	0	8
OG0000359	1	0	1	1	0	1	1	1	0	0	0	1	0	0	1	0	6
OG0000275	1	1	1	1	1	1	1	1	1	1	1	1	1	0	1	0	10
OG0000587	1	1	0	1	1	1	1	1	1	1	1	1	0	0	0	0	9
OG0000742	1	0	0	1	1	1	1	0	1	0	0	1	0	0	1	0	6
OG0001204	0	1	0	0	1	1	1	1	1	0	1	1	0	0	1	0	6
OG0000331	1	0	1	1	0	1	1	1	1	1	1	1	1	0	1	0	8
OG0000898	1	0	0	1	1	1	1	1	1	1	1	0	0	0	1	0	8
OG0001889	1	0	0	1	0	1	1	1	1	0	0	0	0	0	0	0	6
OG0000571	1	1	0	1	1	1	1	0	1	1	1	1	1	0	1	0	8
OG0000762	1	1	0	0	0	1	1	1	1	0	1	1	1	0	1	0	6
OG0001763	1	0	1	0	0	0	1	0	1	0	1	1	0	0	1	0	4
OG0000125	0	1	1	0	1	1	1	1	0	1	1	1	1	0	1	0	7
OG0000378	1	1	0	1	1	1	1	0	1	1	1	1	1	0	1	0	8
OG0001884	1	0	1	0	1	0	1	0	1	0	1	0	0	0	0	0	5
OG0000863	1	1	0	1	1	0	1	1	1	1	1	1	1	0	0	0	8
OG0001046	1	0	0	1	0	1	1	1	1	0	1	0	0	0	0	0	6
OG0001552	1	1	0	1	0	1	1	1	0	0	1	0	0	0	0	0	6
OG0000875	1	1	1	1	1	1	1	1	1	0	1	1	0	0	0	0	9
OG0000243	1	0	1	1	1	1	1	1	1	1	1	1	0	0	0	0	9
OG0002749	0	0	0	0	1	0	0	0	0	0	0	0	0	0	0	0	1
OG0001319	1	0	0	1	0	1	1	1	1	1	1	1	0	0	0	0	7
OG0000643	1	0	0	0	0	1	1	1	1	1	1	1	1	0	1	0	6
OG0002336	0	0	0	0	0	0	1	0	0	0	0	0	1	0	0	0	1
OG0001510	0	0	0	1	1	1	1	1	1	0	0	1	1	0	1	0	6
OG0000466	1	1	0	1	1	1	1	1	1	1	1	1	1	0	1	0	9
OG0000577	1	0	1	1	1	1	1	1	1	1	1	1	0	0	1	0	9
OG0001207	0	1	0	1	0	1	1	1	1	0	1	1	0	0	1	0	6
OG0001703	0	0	0	1	0	1	1	0	1	0	1	1	1	0	1	0	4
OG0000666	1	1	0	1	0	1	1	1	1	1	1	1	1	0	1	0	8
OG0000042	1	1	0	1	1	1	1	1	1	1	1	1	1	1	1	1	9
OG0001000	0	0	0	1	1	1	1	1	1	1	1	1	0	0	1	0	7
OG0001169	1	1	1	1	1	1	1	1	0	1	0	0	1	0	0	0	9
OG0002786	0	0	0	0	0	1	0	0	0	0	0	0	0	0	0	0	1
OG0001535	1	0	0	0	1	1	1	1	0	0	1	1	1	0	0	0	5
OG0000116	1	0	0	1	1	1	1	1	1	0	1	1	0	1	1	1	7
OG0002161	0	0	0	1	0	0	0	1	0	0	1	0	0	0	0	0	2
OG0002279	1	0	0	0	0	0	0	0	1	0	0	0	0	0	0	0	2
OG0002333	0	0	0	0	0	0	1	0	1	0	0	0	0	0	0	0	2
OG0000686	1	0	1	1	1	1	1	1	1	0	1	1	0	0	1	0	8
OG0001382	1	0	0	1	1	0	0	1	1	1	1	1	0	0	0	0	6
OG0000056	1	0	1	1	0	1	1	1	1	0	1	1	1	0	1	0	7
OG0002148	1	0	0	1	0	1	0	0	0	0	0	0	0	0	0	0	3
OG0001228	0	1	1	1	0	0	1	1	1	1	0	1	1	0	1	0	7
OG0000328	1	0	0	1	1	1	1	1	1	0	1	1	1	0	1	0	7
OG0000546	1	1	1	1	0	1	1	1	1	0	1	1	1	0	1	0	8
OG0001355	1	0	0	0	1	1	0	1	1	0	1	1	1	0	1	0	5
OG0001406	1	0	0	0	1	1	0	1	1	0	1	1	1	0	0	0	5
OG0001424	1	0	0	1	0	1	1	1	1	0	0	1	1	0	1	0	6
OG0001128	1	0	0	0	0	1	1	1	1	1	1	1	1	0	1	0	6
OG0002007	0	0	1	1	0	1	0	0	1	0	0	0	0	0	0	0	4
OG0002781	0	0	0	0	0	1	0	0	0	0	0	0	0	0	0	0	1
OG0000871	1	1	1	1	1	1	1	1	1	1	1	0	0	0	0	0	10
OG0000952	0	1	1	0	0	1	1	1	1	1	1	0	1	0	1	0	7
OG0000565	1	1	1	1	1	1	1	1	1	1	0	1	0	0	1	0	10
OG0000501	0	1	1	1	1	1	1	1	1	0	1	1	0	0	1	0	8
OG0001351	1	0	0	0	1	0	1	1	1	0	1	1	1	0	1	0	5
OG0000550	1	1	0	1	0	1	1	1	1	0	0	1	0	0	0	0	7
OG0000132	1	0	0	1	1	1	1	1	1	0	1	1	1	0	1	0	7
OG0000639	1	1	0	1	1	1	1	1	1	1	1	1	0	0	1	0	9
OG0001713	0	0	0	0	1	1	1	1	1	1	1	1	0	0	0	0	6
OG0001717	0	0	0	0	0	1	1	1	1	0	1	1	1	0	1	0	4
OG0001622	1	1	0	1	0	1	1	1	1	0	1	0	0	0	0	0	7
OG0001892	1	0	0	1	1	1	1	1	0	0	0	0	0	0	0	0	6
OG0000427	1	1	0	1	1	1	1	1	1	1	1	1	1	0	1	0	9
OG0001580	1	1	0	1	0	1	1	1	1	0	0	1	0	0	0	0	7
OG0002819	0	0	0	0	0	0	1	0	0	0	0	0	0	0	0	0	1
OG0000403	1	1	0	1	1	1	1	1	1	0	1	1	1	0	1	0	8
OG0000114	1	1	1	1	1	1	1	1	1	1	1	1	0	1	1	0	10
OG0000862	1	1	0	1	1	1	1	1	1	1	0	1	0	0	1	0	9
OG0000249	1	1	0	1	1	1	1	1	1	1	1	1	1	0	1	0	9
OG0001516	0	0	0	1	0	1	1	1	1	1	1	1	1	0	0	0	6
OG0001421	1	1	0	0	1	1	1	0	1	1	1	0	1	0	0	0	7
OG0000022	1	1	1	1	1	1	1	1	1	1	1	1	1	0	1	0	10
OG0001397	1	0	0	1	1	1	1	1	1	1	1	0	0	0	0	0	8
OG0001104	1	1	0	1	1	1	1	1	0	0	1	1	0	0	1	0	7
OG0001385	1	1	0	1	1	1	1	0	0	0	1	1	1	0	0	0	6
OG0001564	1	1	0	1	0	1	1	1	1	0	1	0	0	0	0	0	7
OG0002835	0	0	0	0	0	0	0	1	0	0	0	0	0	0	0	0	1
OG0000599	1	0	0	1	1	1	1	1	1	1	1	1	1	0	1	0	8
OG0000009	1	1	1	1	1	1	1	1	1	1	1	1	0	0	1	0	10
OG0000245	1	1	1	1	1	1	0	1	1	0	1	1	0	0	1	0	8
OG0000432	1	0	0	1	1	0	1	0	1	1	1	1	1	0	1	0	6
OG0001461	0	1	1	1	1	0	1	1	1	1	1	0	0	0	0	0	8
OG0000941	1	1	1	1	0	1	1	1	1	1	1	0	1	0	0	0	9
OG0000477	1	0	1	1	1	1	1	1	1	1	1	1	0	0	0	0	9
OG0000788	1	1	0	1	1	1	1	1	1	1	0	1	0	0	1	0	9
OG0000118	1	0	0	1	1	1	1	1	1	1	1	1	1	1	1	1	8
OG0000197	1	1	0	1	1	1	1	1	1	0	1	1	1	0	1	0	8
OG0001623	1	0	0	1	1	1	1	1	1	0	1	0	0	0	0	0	7
OG0001701	0	0	0	1	0	1	1	1	1	1	0	1	0	0	1	0	6
OG0001050	1	0	1	1	1	1	1	1	1	1	1	0	0	0	0	0	9
OG0000192	1	0	0	1	1	1	1	1	1	0	1	1	0	0	1	0	7
OG0001412	1	0	0	1	0	0	1	1	1	0	0	1	0	0	1	0	5
OG0001567	1	0	1	1	0	1	1	1	1	0	1	0	0	0	0	0	7
OG0001258	0	0	1	0	1	1	1	1	0	1	1	1	1	0	1	0	6
OG0001522	0	0	0	0	1	1	1	0	1	1	1	1	0	0	1	0	5
OG0001828	0	0	1	0	0	0	1	1	0	0	1	1	1	0	1	0	3
OG0000804	1	1	0	1	1	1	1	1	1	1	0	1	0	0	1	0	9
OG0001446	1	0	1	1	1	1	1	1	1	0	1	0	0	0	0	0	8
OG0001930	0	0	0	1	0	1	1	0	0	0	0	1	1	0	1	0	3
OG0000486	0	1	0	1	0	0	1	1	0	0	0	0	0	0	0	0	4
OG0001730	1	0	0	1	0	1	1	1	0	0	1	0	0	0	0	0	5
OG0001709	0	0	0	1	1	0	1	0	1	1	1	1	0	0	0	0	5
OG0000982	0	1	0	1	0	1	1	1	0	0	0	1	1	0	1	0	5
OG0002173	0	0	0	0	0	1	1	1	0	0	0	0	0	0	0	0	3
OG0002727	0	0	0	1	0	0	0	0	0	0	0	0	0	0	0	0	1
OG0000103	1	0	0	1	0	1	0	1	1	1	1	1	1	1	1	1	6
OG0001220	0	1	0	0	0	1	1	1	1	1	1	1	1	0	1	0	6
OG0000166	1	1	0	1	0	1	1	1	1	0	1	1	1	1	1	1	7
OG0000986	0	0	1	1	1	0	1	1	1	1	1	1	1	0	1	0	7
OG0000882	1	0	0	1	0	1	1	1	1	1	1	1	1	0	1	0	7
OG0001118	1	0	0	1	0	1	1	1	1	1	1	1	1	0	0	0	7
OG0000083	1	0	1	0	1	1	1	0	1	1	1	1	1	1	1	1	7
OG0001529	0	0	0	0	0	1	0	1	1	0	1	1	1	1	1	1	3
OG0001756	1	0	0	0	1	0	1	1	0	0	0	1	1	0	1	0	4
OG0001787	0	1	0	0	0	0	1	1	1	1	0	1	1	0	0	0	5
OG0001434	1	1	0	1	0	1	1	1	1	0	1	1	0	0	0	0	7
OG0000713	0	1	1	1	1	1	1	1	1	0	1	1	1	0	0	0	8
OG0000058	1	1	1	1	1	1	1	1	1	1	1	1	1	1	1	0	10
OG0000698	0	1	0	1	0	1	0	1	1	0	0	1	1	0	1	0	5
OG0000726	0	1	1	1	1	1	1	1	1	0	1	1	1	0	1	0	8
OG0000111	1	1	1	1	1	1	1	1	1	1	1	1	1	0	1	0	10
OG0000032	1	0	1	1	1	1	1	1	1	1	1	1	1	0	1	0	9
OG0001893	1	0	0	1	0	0	1	1	0	1	1	0	0	0	0	0	5
OG0001013	1	0	1	0	0	1	0	1	1	1	1	1	1	0	1	0	6
OG0000224	1	1	1	1	1	1	1	1	1	1	1	0	0	0	0	0	10
OG0000010	1	1	1	1	1	1	1	1	1	1	1	1	1	0	1	0	10
OG0000763	1	0	1	1	0	1	1	1	1	0	0	1	1	0	1	0	7
OG0000218	1	1	1	1	0	1	1	1	1	1	1	1	0	0	1	0	9
OG0000832	1	1	0	1	1	1	1	1	1	0	1	1	0	0	1	0	8
OG0000041	1	1	1	1	1	1	1	1	1	0	1	1	1	0	1	0	9
OG0001201	0	1	1	1	0	1	1	1	1	0	0	1	0	0	1	0	7
OG0001904	0	1	0	1	1	0	1	1	0	0	1	0	0	0	0	0	5
OG0002152	0	1	0	0	0	0	1	1	0	0	0	0	0	0	0	0	3
OG0000217	1	1	0	1	1	1	1	1	1	1	1	1	1	0	1	0	9
OG0000715	0	1	1	1	1	1	1	1	1	0	1	1	0	0	1	0	8
OG0002734	0	0	0	1	0	0	0	0	0	0	0	0	0	0	0	0	1
OG0000093	1	0	1	1	1	0	1	1	0	1	1	1	1	1	1	1	7
OG0001253	0	0	1	1	0	1	0	1	1	1	1	1	1	0	1	0	6
OG0001961	1	0	0	0	0	1	1	0	1	0	1	0	0	0	0	0	4
OG0001923	0	0	1	0	0	1	0	0	1	1	1	1	0	0	0	0	4
OG0001789	0	1	1	1	0	1	0	0	0	1	0	1	1	0	0	0	5
OG0000158	1	0	0	1	1	1	1	1	1	0	1	1	1	0	1	0	7
OG0000620	1	1	0	1	1	1	1	1	1	0	1	1	1	0	1	0	8
OG0001244	0	1	0	1	1	1	0	1	1	0	1	1	1	0	1	0	6
OG0001653	0	1	0	0	1	1	1	1	0	0	1	1	0	0	1	0	5
OG0000528	1	1	1	1	1	1	1	1	1	1	1	0	0	0	1	0	10
OG0000072	1	1	1	1	0	1	1	1	1	1	1	1	1	0	0	0	9
OG0000025	1	1	1	1	1	1	1	1	1	1	1	1	1	0	1	0	10
OG0001484	0	1	0	1	1	0	0	1	0	1	1	1	1	0	1	0	5
OG0000789	1	1	0	1	1	1	1	1	1	0	0	1	1	0	0	0	8
OG0001483	0	1	0	0	1	1	1	1	1	1	1	1	0	0	0	0	7
OG0000442	1	1	1	1	1	1	1	1	1	0	1	1	1	0	0	0	9
OG0000273	1	1	1	1	1	1	1	1	1	1	1	1	1	0	1	0	10
OG0000706	0	1	0	1	1	0	1	1	1	1	1	1	1	0	1	0	7
OG0002763	0	0	0	0	1	0	0	0	0	0	0	0	0	0	0	0	1
OG0001260	0	0	1	1	0	1	0	1	1	0	1	1	1	0	1	0	5
OG0000510	1	1	0	1	1	1	1	1	1	1	1	1	0	0	1	0	9
OG0001340	1	0	0	1	0	1	1	1	1	1	1	1	0	0	0	0	7
OG0002813	0	0	0	0	0	0	1	0	0	0	0	0	0	0	0	0	1
OG0000138	1	0	1	1	0	1	1	1	1	1	1	1	1	1	1	1	8
OG0001285	0	0	0	0	1	1	1	1	1	0	0	1	1	0	1	0	5
OG0000153	1	1	1	1	1	1	1	1	1	0	1	1	1	1	1	1	9
OG0000376	1	0	0	0	1	1	1	1	1	1	1	1	0	0	1	0	7
OG0000341	1	0	0	1	1	1	1	1	1	1	1	1	0	1	1	1	8
OG0000592	1	1	1	1	0	1	1	1	1	1	1	1	1	0	0	0	9
OG0001108	1	1	0	1	1	1	1	1	1	1	1	0	0	0	0	0	9
OG0000338	1	1	1	1	1	1	1	1	0	1	1	1	0	0	0	0	9
OG0001689	0	0	1	0	1	0	1	1	1	0	1	1	0	0	0	0	5
OG0000888	1	1	0	0	0	1	1	1	1	1	0	1	1	0	1	0	7
OG0001144	1	0	0	1	1	1	1	1	1	0	1	1	1	0	0	0	7
OG0000847	1	0	1	1	0	1	0	1	1	1	1	1	0	0	1	0	7
OG0002008	0	0	1	1	0	0	0	1	1	1	0	0	0	0	0	0	5
OG0002871	0	0	0	0	0	0	0	0	0	1	0	0	0	0	0	0	1
OG0001993	0	1	0	1	0	0	1	1	0	1	0	0	0	0	0	0	5
OG0002097	0	0	0	0	0	1	1	1	1	0	0	0	0	0	0	0	4
OG0002858	0	0	0	0	0	0	0	0	1	0	0	0	0	0	0	0	1
OG0001773	1	0	0	1	0	1	1	1	1	0	0	1	0	0	0	0	6
OG0001972	1	0	1	0	0	1	0	1	1	0	0	0	0	0	0	0	5
OG0000743	1	1	1	1	1	0	1	1	1	1	1	1	0	0	0	0	9
OG0001297	1	0	1	1	0	1	1	1	1	1	1	0	0	0	0	0	8
OG0001925	0	0	0	1	1	1	1	0	1	0	1	0	0	0	0	0	5
OG0002021	0	0	0	1	1	0	1	0	1	0	1	0	0	0	0	0	4
OG0001251	0	0	1	1	0	1	1	1	1	1	0	1	1	0	1	0	7
OG0002071	0	1	0	0	1	1	1	0	0	0	0	0	0	0	0	0	4
OG0000583	1	0	0	1	1	1	0	1	1	1	1	1	1	0	1	0	7
OG0000176	1	1	1	1	1	1	1	1	1	1	1	1	1	0	1	0	10
OG0001080	1	0	0	1	0	1	0	1	1	1	1	1	1	0	1	0	6
OG0000582	1	1	1	1	0	1	0	1	1	0	0	1	1	0	1	0	7
OG0001079	1	1	0	1	0	1	1	1	1	0	1	1	0	0	1	0	7
OG0001555	1	1	1	0	0	0	0	1	0	0	1	1	1	0	1	0	4
OG0000749	1	0	0	1	1	1	1	1	1	0	1	1	1	0	1	0	7
OG0002758	0	0	0	0	1	0	0	0	0	0	0	0	0	0	0	0	1
OG0001423	1	1	0	1	0	0	1	1	0	0	1	1	1	0	1	0	5
OG0002844	0	0	0	0	0	0	0	1	0	0	0	0	0	0	0	0	1
OG0000682	1	1	1	0	0	1	1	1	1	1	1	1	1	0	1	0	8
OG0000028	1	1	1	1	1	1	1	1	1	1	1	1	1	0	1	0	10
OG0001817	0	1	1	1	0	1	1	0	0	1	0	1	0	0	0	0	6
OG0002666	1	0	0	0	0	0	0	0	0	0	0	0	0	0	0	0	1
OG0000260	1	0	0	1	1	1	1	1	1	1	1	1	1	1	1	1	8
OG0000868	1	1	0	0	1	1	1	1	0	1	0	1	0	1	1	1	7
OG0000700	0	1	1	1	0	0	1	1	1	1	0	1	0	0	1	0	7
OG0001219	0	1	1	0	1	1	1	1	1	1	1	1	0	0	0	0	8
OG0001426	1	1	1	0	0	1	1	1	1	1	1	0	0	0	0	0	8
OG0002297	0	0	1	0	0	0	0	1	0	0	0	0	0	0	0	0	2
OG0002850	0	0	0	0	0	0	0	1	0	0	0	0	0	0	0	0	1
OG0000671	1	1	1	1	0	1	1	1	1	1	1	0	0	0	0	0	9
OG0002003	0	1	0	1	1	1	0	0	0	0	0	0	1	0	0	0	4
OG0000160	1	1	1	0	1	1	1	1	1	0	1	1	1	1	1	1	8
OG0000268	1	0	1	1	1	1	1	1	0	1	1	1	1	1	1	1	8
OG0001354	1	0	0	0	1	1	0	1	1	0	1	1	1	0	1	0	5
OG0001464	0	1	0	1	1	0	0	1	1	0	1	1	1	0	1	0	5
OG0000020	0	1	0	0	0	0	0	1	0	0	0	1	1	0	1	0	2
OG0000046	1	1	0	1	0	1	1	1	1	0	1	1	1	0	0	0	7
OG0000095	0	0	0	1	1	1	1	1	1	0	1	1	1	0	0	0	6
OG0000457	1	1	1	1	1	1	1	0	1	1	1	1	1	0	1	0	9
OG0000758	1	1	1	1	1	1	1	1	1	1	1	0	0	0	0	0	10
OG0001383	1	1	0	1	1	1	1	1	1	0	1	0	0	0	0	0	8
OG0000256	1	0	1	1	1	1	1	1	1	1	1	1	1	0	0	0	9
OG0000814	1	1	0	1	1	1	1	1	1	0	1	1	0	0	1	0	8
OG0001769	1	0	0	1	0	1	0	1	1	0	1	0	0	0	0	0	5
OG0001885	1	0	0	0	0	1	0	1	1	0	1	0	0	0	0	0	4
OG0001343	1	0	1	1	1	1	1	1	0	0	1	1	0	0	0	0	7
OG0001368	1	1	1	1	0	1	1	1	1	0	1	0	0	0	0	0	8
OG0001924	0	0	0	1	1	0	1	0	0	1	0	1	0	0	1	0	4
OG0001224	0	1	0	1	1	1	1	1	0	0	1	1	1	0	1	0	6
OG0002303	0	0	0	1	0	0	0	0	1	0	0	0	0	0	0	0	2
OG0001801	0	1	0	1	1	0	1	1	1	1	0	0	0	0	0	0	7
OG0000016	1	0	1	1	1	1	1	1	1	0	1	1	1	0	1	0	8
OG0001330	1	0	0	1	1	1	1	1	0	1	1	0	0	0	0	0	7
OG0002330	0	0	0	0	0	1	0	1	0	0	0	0	0	0	0	0	2
OG0000482	1	0	1	1	0	1	1	1	1	1	1	1	0	0	0	0	8
OG0000524	1	1	1	1	0	1	1	1	1	1	1	1	0	0	1	0	9
OG0001683	0	0	1	1	1	1	1	1	0	0	1	0	0	0	0	0	6
OG0000301	1	1	0	1	1	1	1	1	1	0	1	1	1	0	0	0	8
OG0001411	1	0	0	0	1	0	1	1	1	0	1	1	1	0	1	0	5
OG0000468	1	0	0	1	1	1	1	1	1	1	1	0	0	0	0	0	8
OG0000767	1	0	1	1	0	1	1	1	0	0	1	1	1	0	0	0	6
OG0000075	1	0	1	1	1	1	1	1	1	1	0	1	1	0	0	0	9
OG0000226	1	1	1	1	1	1	1	1	1	1	1	1	1	0	1	0	10
OG0002068	0	1	0	0	1	0	0	1	0	1	0	0	0	0	0	0	4
OG0001092	1	0	1	1	0	1	0	1	1	0	1	1	1	0	1	0	6
OG0000073	1	0	1	1	0	1	1	1	1	1	1	1	1	0	0	0	8
OG0002039	0	0	0	0	0	0	1	1	0	0	0	1	1	0	1	0	2
OG0001073	1	1	1	1	0	1	1	1	1	1	1	0	0	0	0	0	9
OG0001476	0	1	1	1	0	1	1	1	1	1	1	0	0	0	0	0	8
OG0001226	0	1	0	0	0	0	1	1	1	1	0	1	1	1	1	0	5
OG0000459	1	1	0	1	1	1	1	1	1	0	1	1	1	0	1	0	8
OG0002278	1	0	0	0	0	0	0	0	0	0	0	0	1	0	0	0	1
OG0002088	0	0	0	1	0	0	1	1	0	1	0	0	0	0	0	0	4
OG0000040	0	1	1	1	1	1	1	1	1	1	1	1	1	1	1	0	9
OG0000029	1	1	1	1	1	1	1	1	1	1	1	1	1	0	1	0	10
OG0000960	0	1	1	1	1	1	0	1	0	0	0	1	0	0	1	0	6
OG0000131	1	1	1	1	0	1	1	1	1	1	0	1	0	0	0	0	9
OG0000667	1	0	1	0	1	1	1	1	1	0	0	1	1	0	1	0	7
OG0000255	1	0	1	0	1	1	1	1	1	1	1	1	1	1	1	1	8
OG0002102	0	0	0	0	0	1	0	1	1	1	0	0	0	0	0	0	4
OG0000998	0	0	0	1	1	1	0	0	1	1	0	1	1	1	1	1	5
OG0001275	0	0	0	1	1	0	1	0	1	1	0	1	1	1	1	1	5
OG0000347	1	1	0	1	1	1	1	1	1	1	1	1	0	0	1	0	9
OG0001674	0	1	1	0	1	0	0	0	0	1	1	1	1	0	1	0	4
OG0002741	0	0	0	1	0	0	0	0	0	0	0	0	0	0	0	0	1
OG0001012	1	1	1	1	0	1	1	1	1	1	1	0	0	0	0	0	9
OG0001187	1	1	0	1	0	0	0	1	0	1	0	1	1	1	1	0	5
OG0001208	0	1	0	1	0	0	1	1	0	1	0	1	1	1	1	0	5
OG0002845	0	0	0	0	0	0	0	1	0	0	0	0	0	0	0	0	1
OG0000450	1	1	1	1	1	1	1	1	1	1	1	1	1	0	0	0	10
OG0000893	1	0	1	1	1	1	1	1	1	1	1	1	0	0	0	0	9
OG0001793	0	1	1	1	0	0	0	1	0	1	0	1	0	0	0	0	5
OG0001994	0	1	1	1	0	0	0	1	0	0	0	1	0	0	0	0	4
OG0001899	0	1	1	1	0	0	0	1	0	1	0	1	0	0	0	0	5
OG0000497	0	1	0	1	1	1	1	1	0	1	1	1	1	0	0	0	7
OG0000543	1	0	1	1	1	1	1	1	0	1	1	1	1	0	0	0	8
OG0000852	1	1	0	1	1	1	1	0	1	1	1	0	0	0	0	0	8
OG0001617	1	1	0	1	0	1	1	1	1	0	0	1	0	0	0	0	7
OG0000940	1	0	1	1	0	0	1	1	1	1	1	1	0	0	0	0	7
OG0001150	1	1	0	1	0	1	1	1	1	1	1	1	0	0	0	0	8
OG0000913	1	1	0	1	1	1	1	1	1	1	1	1	0	0	0	0	9
OG0001401	1	1	0	1	1	0	1	1	0	1	1	0	0	0	1	0	7
OG0001883	1	0	0	1	0	0	1	1	0	1	0	0	0	0	1	0	5
OG0000540	1	0	1	1	0	1	1	1	1	1	1	1	1	0	1	0	8
OG0000408	1	0	1	1	1	1	1	0	1	1	1	1	1	0	1	0	8
OG0000722	0	1	1	1	1	0	1	0	1	1	1	1	1	0	1	0	7
OG0000496	0	1	1	1	1	1	1	1	1	1	1	1	1	0	1	0	9
OG0002282	1	1	0	0	0	0	0	0	0	0	0	0	0	0	0	0	2
OG0000423	1	1	0	1	1	1	1	1	1	1	1	1	1	0	1	0	9
OG0000109	1	0	1	1	1	1	1	1	1	1	1	1	1	1	1	0	9
OG0000085	1	1	0	1	1	1	1	1	1	1	1	1	1	0	1	0	9
OG0001710	0	0	0	0	1	1	1	0	0	1	1	1	0	0	1	0	4
OG0000304	0	1	0	1	0	1	1	1	1	0	1	1	1	0	1	0	6
OG0001090	1	1	1	1	0	1	1	1	1	1	1	0	0	0	0	0	9
OG0001656	0	1	0	1	0	1	1	1	1	0	1	0	1	0	0	0	6
OG0001089	1	0	1	1	1	1	1	1	1	1	1	0	0	0	0	0	9
OG0001480	0	1	0	1	0	1	0	1	0	1	1	1	1	0	1	0	5
OG0001313	1	0	0	1	1	1	1	1	1	1	0	1	0	0	0	0	8
OG0000100	1	1	0	1	1	1	1	1	1	0	0	1	0	0	0	0	8
OG0002748	0	0	0	0	1	0	0	0	0	0	0	0	0	0	0	0	1
OG0000845	1	0	1	0	0	1	1	1	1	1	0	1	1	0	1	0	7
OG0000983	0	0	1	0	1	1	1	1	1	1	1	1	0	0	1	0	7
OG0000731	0	0	1	1	1	1	1	0	0	1	1	1	0	1	1	1	6
OG0001331	1	0	0	1	1	1	1	1	1	1	1	0	0	0	0	0	8
OG0002770	0	0	0	0	0	1	0	0	0	0	0	0	0	0	0	0	1
OG0000597	1	0	1	0	0	1	1	1	1	1	1	1	0	1	1	1	7
OG0000854	1	0	1	1	1	1	1	1	1	0	1	1	0	0	1	0	8
OG0001664	0	1	0	1	0	1	0	1	0	1	1	1	0	0	1	0	5
OG0000552	1	1	0	1	1	1	1	1	1	1	0	1	1	0	1	0	9
OG0000306	0	1	0	0	0	1	1	1	1	1	1	1	1	1	1	1	6
OG0000460	1	1	0	1	0	1	1	1	1	1	1	1	1	1	1	0	8
OG0000994	0	0	1	1	1	1	0	1	1	1	1	1	1	0	1	0	7
OG0000518	1	1	0	1	1	1	1	1	1	1	1	1	1	0	0	0	9
OG0000720	0	1	0	1	1	0	1	1	0	1	0	1	1	0	1	0	6
OG0001196	0	1	0	1	1	1	1	0	1	0	1	1	1	0	1	0	6
OG0000282	1	1	1	1	1	1	1	1	1	1	1	1	1	0	1	0	10
OG0001170	1	1	0	1	0	1	1	1	1	1	1	0	0	0	1	0	8
OG0001268	0	0	0	1	1	1	1	1	1	0	1	1	0	0	1	0	6
OG0001306	1	0	1	1	0	0	1	1	0	0	1	1	0	0	1	0	5
OG0001070	1	0	0	1	1	1	1	1	1	0	1	1	0	0	1	0	7
OG0000685	1	1	0	1	0	1	1	1	1	1	1	1	1	0	1	0	8
OG0000223	1	1	0	1	1	1	1	1	1	1	1	1	1	0	1	0	9
OG0000684	1	1	1	1	0	1	0	1	1	1	1	1	1	0	1	0	8
OG0001229	0	1	1	1	1	0	1	1	1	1	0	1	0	0	1	0	8
OG0001508	0	0	1	0	0	1	0	1	1	1	1	1	1	0	1	0	5
OG0001950	1	0	0	1	1	0	0	0	1	0	0	1	0	0	0	0	4
OG0001986	1	0	0	0	1	1	1	1	0	0	0	0	0	0	0	0	5
OG0000284	1	1	1	0	1	1	1	0	1	1	1	1	1	0	1	0	8
OG0002305	0	0	0	1	0	0	0	0	1	0	0	0	0	0	0	0	2
OG0000381	1	1	0	1	1	1	1	1	1	1	1	1	1	0	1	0	9
OG0000717	0	1	1	1	1	0	1	1	1	1	1	1	0	0	0	0	8
OG0002664	1	0	0	0	0	0	0	0	0	0	0	0	0	0	0	0	1
OG0000259	1	0	1	1	1	1	1	1	1	1	1	1	1	0	1	0	9
OG0001775	1	0	0	1	1	1	1	1	0	0	0	1	0	0	0	0	6
OG0000609	1	0	1	1	1	0	1	1	1	1	1	1	1	0	1	0	8
OG0000520	1	0	0	0	1	1	1	1	1	0	1	1	1	0	1	0	6
OG0002665	1	0	0	0	0	0	0	0	0	0	0	0	0	0	0	0	1
OG0000133	1	1	0	1	0	1	1	1	1	1	1	1	1	0	1	0	8
OG0000342	1	1	0	0	0	1	1	1	1	1	1	1	1	0	1	0	7
OG0002724	0	0	0	1	0	0	0	0	0	0	0	0	0	0	0	0	1
OG0000181	1	1	1	1	1	1	1	1	1	1	1	1	1	0	0	0	10
OG0000302	1	1	0	1	1	1	1	1	1	0	1	1	1	1	1	1	8
OG0000783	1	1	1	1	0	1	1	1	0	0	1	1	0	1	1	0	7
OG0000285	1	0	0	1	1	1	1	1	1	1	1	1	1	1	1	0	8
OG0000968	0	1	1	1	1	1	1	1	0	0	1	1	0	1	1	0	7
OG0000725	0	1	1	1	0	1	1	1	1	1	1	1	1	0	1	0	8
OG0001231	0	1	0	1	1	0	1	1	1	1	1	1	0	0	0	0	7
OG0001679	0	1	1	1	1	0	0	1	0	0	0	1	0	0	1	0	5
OG0001926	0	0	0	1	1	1	1	0	1	0	1	0	0	0	0	0	5
OG0000198	0	1	0	0	1	1	1	1	1	1	1	1	1	1	1	0	7
OG0000182	1	1	1	0	1	1	1	1	1	1	1	1	1	0	1	0	9
OG0000870	1	1	1	1	1	1	1	1	1	1	1	0	0	0	0	0	10
OG0000748	1	0	0	1	1	1	1	1	1	0	1	1	1	0	1	0	7
OG0000474	1	1	1	1	1	1	1	1	1	0	1	1	1	0	1	0	9
OG0000703	0	1	1	0	1	1	1	1	1	1	1	1	1	0	1	0	8
OG0000808	1	1	0	1	0	1	1	1	1	1	1	1	0	0	1	0	8
OG0001138	1	1	1	1	1	1	1	1	1	0	1	0	0	0	0	0	9
OG0000248	1	1	0	1	1	1	1	1	1	0	1	1	1	0	1	0	8
OG0001711	0	0	0	0	1	1	1	0	0	0	1	1	1	0	1	0	3
OG0001190	1	1	1	1	0	1	1	1	0	1	0	1	0	0	1	0	8
OG0001264	0	0	1	1	1	1	1	1	1	0	1	1	0	0	1	0	7
OG0001940	0	0	0	0	0	1	1	1	1	1	0	0	0	0	0	0	5
OG0001257	0	0	1	0	1	1	1	1	0	1	1	1	1	0	1	0	6
OG0000672	1	0	0	1	1	1	1	1	1	1	1	1	1	0	1	0	8
OG0000920	1	1	0	1	0	1	1	1	0	1	1	1	0	0	1	0	7
OG0000305	0	1	1	1	1	1	1	1	1	1	1	0	0	0	0	0	9
OG0000942	1	1	0	1	0	1	1	1	1	1	1	1	0	0	1	0	8
OG0001511	0	0	0	1	0	1	1	1	1	0	1	1	0	0	1	0	5
OG0001650	0	1	0	1	1	0	1	0	0	0	1	1	1	0	0	0	4
OG0000037	1	0	1	0	1	1	1	1	1	1	1	1	1	0	1	0	8
OG0001415	1	0	1	0	1	1	1	1	1	1	1	0	0	0	0	0	8
OG0000008	1	1	1	1	1	1	1	1	1	1	1	1	1	0	1	0	10
OG0000429	1	1	0	1	1	1	1	1	1	1	1	1	1	0	1	0	9
OG0001855	1	0	0	1	0	1	1	1	0	0	1	0	0	0	0	0	5
OG0000752	1	0	1	1	0	1	1	1	1	1	1	1	0	0	1	0	8
OG0001690	0	0	1	1	0	0	1	1	1	0	0	1	1	0	1	0	5
OG0000000	0	1	1	1	1	1	1	1	1	1	1	1	1	0	1	0	9
OG0000710	0	1	0	1	0	1	1	1	1	0	1	1	1	0	1	0	6
OG0001569	1	0	0	1	1	1	1	1	1	1	0	0	0	0	0	0	8
OG0001292	1	0	0	1	1	1	1	1	1	0	1	1	0	0	0	0	7
OG0000892	1	0	1	1	1	1	0	1	1	1	1	1	0	0	1	0	8
OG0001088	1	1	0	1	1	1	1	1	0	0	1	1	1	0	0	0	7
OG0001875	1	0	0	1	1	1	1	0	1	0	0	0	0	0	0	0	6
OG0000106	1	1	1	1	1	1	1	1	1	1	1	1	1	1	1	1	10
OG0001155	1	0	0	1	0	1	1	1	1	0	1	1	1	0	1	0	6
OG0002870	0	0	0	0	0	0	0	0	0	1	0	0	0	0	0	0	1
OG0000621	1	0	1	1	0	1	0	1	1	0	1	1	1	1	1	1	6
OG0000087	1	1	1	1	1	1	1	1	1	1	1	1	1	1	1	0	10
OG0002325	0	0	0	0	0	1	0	0	0	1	0	0	0	0	0	0	2
OG0001838	0	0	0	0	1	1	1	1	1	1	1	0	0	0	0	0	6
OG0001486	0	1	0	0	1	0	0	1	1	1	1	1	1	0	1	0	5
OG0001438	1	0	0	1	1	1	1	1	1	0	1	1	0	0	0	0	7
OG0000213	1	1	1	1	0	1	1	1	1	1	1	1	1	0	1	0	9
OG0000467	1	1	1	1	1	1	1	1	1	1	1	1	0	0	1	0	10
OG0000578	1	0	1	1	1	1	1	1	1	1	1	1	0	0	0	0	9
OG0001256	0	0	1	0	1	0	1	1	1	1	1	1	1	0	1	0	6
OG0001451	1	1	0	0	0	1	1	1	1	0	1	1	1	0	0	0	6
OG0000094	1	1	0	0	1	1	1	1	1	1	1	1	1	0	1	0	8
OG0000828	1	0	0	1	1	1	1	1	1	1	1	1	0	0	1	0	8
OG0001460	0	1	0	1	1	1	1	0	0	0	1	1	1	0	1	0	5
OG0002072	0	1	0	0	1	1	1	0	0	0	0	0	0	0	0	0	4
OG0001620	1	0	0	1	0	1	1	1	1	1	1	0	0	0	0	0	7
OG0000088	1	1	1	0	1	1	1	1	1	1	1	1	0	0	1	0	9
OG0000859	1	0	0	0	0	1	1	1	1	1	1	1	0	0	1	0	6
OG0000886	1	1	0	1	1	1	1	1	1	1	0	1	0	0	1	0	9
OG0001413	1	0	1	0	1	0	1	1	1	0	1	1	0	0	1	0	6
OG0001436	1	0	0	1	1	1	1	1	1	1	1	0	0	0	0	0	8
OG0000165	1	0	0	1	1	1	1	1	1	1	1	1	1	0	1	0	8
OG0000174	1	1	1	1	0	1	1	1	1	1	1	1	1	0	1	0	9
OG0001102	1	0	1	1	1	1	1	1	1	1	1	0	0	0	0	0	9
OG0000681	1	1	1	0	0	1	1	1	1	1	1	1	1	0	1	0	8
OG0000824	1	1	0	1	0	1	0	1	1	0	0	1	1	0	0	0	6
OG0000443	1	1	0	1	1	1	1	1	1	1	1	1	1	0	1	0	9
OG0000398	1	1	1	1	0	1	1	1	1	1	1	1	1	0	1	0	9
OG0000631	1	1	1	1	0	1	1	1	1	1	0	1	1	0	1	0	9
OG0000141	1	1	0	1	1	1	1	1	1	1	1	1	1	1	1	1	9
OG0000627	1	1	1	1	1	1	1	1	1	0	1	1	0	0	1	0	9
OG0000488	0	1	1	1	1	0	1	1	1	1	1	1	1	1	1	0	8
OG0000663	1	0	0	1	1	1	0	1	1	0	1	1	0	1	1	1	6
OG0000389	1	0	0	1	1	1	1	1	1	1	1	0	0	0	1	0	8
OG0000318	1	1	1	1	1	1	0	1	1	0	1	1	1	0	1	0	8
OG0000315	1	1	0	1	0	1	1	1	1	0	1	1	1	0	1	0	7
OG0001375	1	0	1	1	0	1	1	1	1	1	1	0	0	0	0	0	8
OG0000340	1	0	1	1	0	1	1	1	1	0	1	1	1	1	1	1	7
OG0002675	1	0	0	0	0	0	0	0	0	0	0	0	0	0	0	0	1
OG0000574	1	1	0	1	1	1	1	1	1	0	1	1	1	0	1	0	8
OG0000835	1	1	0	1	1	1	1	1	1	0	1	1	0	0	1	0	8
OG0000101	1	0	1	1	1	0	1	1	1	0	1	1	1	0	1	0	7
OG0001566	1	1	0	0	0	1	1	1	1	1	1	0	0	0	0	0	7
OG0000894	1	1	0	1	1	0	1	1	1	0	1	1	1	0	1	0	7
OG0000012	1	1	1	1	1	1	1	1	1	0	1	1	1	0	1	0	9
OG0000411	1	0	1	1	1	1	1	1	1	1	1	1	1	0	1	0	9
OG0001866	1	0	0	0	0	1	1	1	1	0	1	0	0	0	0	0	5
OG0001759	1	1	0	0	0	1	1	1	1	0	1	0	0	0	0	0	6
OG0001882	1	0	0	0	1	1	0	1	1	0	1	0	0	0	0	0	5
OG0001586	1	1	0	0	1	1	1	1	1	0	1	0	0	0	0	0	7
OG0000887	1	0	1	1	0	1	1	1	1	1	1	0	0	0	0	0	8
OG0002685	1	0	0	0	0	0	0	0	0	0	0	0	0	0	0	0	1
OG0000594	1	0	1	1	0	1	1	1	1	1	1	0	0	0	0	0	8
OG0001085	1	1	0	1	0	1	1	0	1	0	1	1	1	0	1	0	6
OG0001149	1	1	1	0	0	1	1	1	1	0	1	1	1	0	0	0	7
OG0001199	0	1	0	1	0	1	1	1	0	1	1	1	1	0	1	0	6
OG0000159	1	0	0	1	1	1	1	1	1	1	0	1	1	0	1	0	8
OG0001498	0	0	1	1	0	1	0	1	1	0	0	1	1	0	0	0	5
OG0000271	1	1	0	1	1	1	1	1	1	1	0	1	1	0	1	0	9
OG0000346	1	1	1	1	0	1	1	1	0	0	1	1	1	1	1	1	7
OG0001766	1	0	0	0	0	0	1	1	1	0	0	1	1	0	1	0	4
OG0001274	0	0	0	1	0	1	0	0	1	1	1	1	1	1	1	1	4
OG0000997	0	0	0	1	0	1	1	0	1	1	1	1	1	1	1	1	5
OG0000735	0	0	0	1	1	1	0	0	1	1	1	1	1	1	1	1	5
OG0000215	1	0	1	0	1	1	1	1	1	1	1	1	1	1	1	1	8
OG0000377	1	0	0	0	1	1	0	1	1	1	1	1	1	0	1	0	6
OG0001812	0	1	0	0	1	0	1	1	1	0	0	1	0	0	1	0	5
OG0001932	0	0	0	1	0	0	1	1	0	0	0	1	1	0	1	0	3
OG0000683	1	0	0	1	1	1	1	1	1	1	1	1	1	0	0	0	8
OG0001178	1	0	1	1	0	1	1	1	1	1	1	0	0	0	0	0	8
OG0002766	0	0	0	0	1	0	0	0	0	0	0	0	0	0	0	0	1
OG0001779	1	1	0	1	0	0	0	1	0	1	0	1	0	0	0	0	5
OG0001832	0	0	0	1	0	0	1	1	0	0	1	1	1	0	1	0	3
OG0000209	1	0	0	1	1	1	1	1	1	0	1	1	1	0	1	0	7
OG0001834	0	0	0	1	0	1	1	0	0	0	0	1	0	0	1	0	3
OG0001528	0	0	0	0	0	1	1	0	1	0	0	1	1	0	1	0	3
OG0000283	1	1	1	1	1	1	1	1	1	1	1	0	0	0	0	0	10
OG0002769	0	0	0	0	0	1	0	0	0	0	0	0	0	0	0	0	1
OG0001392	1	1	1	1	1	1	1	1	0	1	0	0	0	0	0	0	9
OG0001853	1	0	0	1	1	1	1	0	0	0	1	0	0	0	0	0	5
OG0001903	0	1	0	1	0	1	0	1	1	0	0	1	0	0	0	0	5
OG0001287	1	1	0	1	0	1	1	1	1	0	1	0	0	0	0	0	7
OG0000435	1	1	1	1	1	1	1	1	1	1	1	1	0	0	1	0	10
OG0000063	1	1	1	1	1	1	1	1	1	1	1	1	1	0	1	0	10
OG0000351	1	1	0	1	1	1	1	1	1	1	1	1	1	0	1	0	9
OG0002705	0	1	0	0	0	0	0	0	0	0	0	0	0	0	0	0	1
OG0000595	1	0	1	1	1	1	1	1	1	0	1	1	1	0	1	0	8
OG0000539	1	0	0	1	1	1	0	1	1	1	0	1	1	1	1	1	7
OG0000219	1	0	0	1	1	1	1	1	1	1	0	1	1	1	1	1	8
OG0000537	1	0	0	1	1	1	0	1	1	1	0	1	1	1	1	1	7
OG0000465	1	0	1	1	1	1	1	1	1	0	1	1	1	0	1	1	8
OG0000538	1	0	0	1	1	1	0	1	1	1	0	1	1	1	1	1	7
OG0000772	1	0	0	1	1	1	1	1	1	1	0	1	1	0	1	0	8
OG0001163	1	0	1	0	1	1	1	1	1	0	1	1	0	0	1	0	7
OG0000102	1	0	0	1	1	1	1	1	1	0	1	1	1	1	1	1	7
OG0001115	1	0	0	1	1	1	1	1	1	1	1	0	0	0	0	0	8
OG0000367	1	1	0	1	1	1	1	1	1	1	0	1	1	1	1	0	9
OG0002836	0	0	0	0	0	0	0	1	0	0	0	0	0	0	0	0	1
OG0001638	0	1	0	1	0	1	1	0	1	0	1	1	0	0	1	0	5
OG0000723	0	1	0	1	1	1	1	1	1	0	1	1	0	0	1	0	7
OG0001077	1	0	0	0	1	0	1	1	1	0	1	1	1	0	1	0	5
OG0000438	1	1	0	1	1	1	1	1	0	1	1	1	1	0	1	0	8
OG0000208	1	0	1	1	1	1	0	1	1	0	1	1	1	0	1	0	7
OG0000931	1	1	1	1	1	1	1	1	1	1	1	0	0	0	0	0	10
OG0002077	0	0	1	1	0	0	0	1	0	0	1	0	0	0	0	0	3
OG0000519	1	1	0	0	1	1	1	1	1	1	0	1	0	0	1	0	8
OG0000858	1	0	1	1	1	0	1	1	1	1	1	1	1	0	0	0	8
OG0000251	1	0	0	1	1	1	1	1	1	1	0	1	1	0	1	0	8
OG0000420	1	1	1	1	1	1	1	1	1	0	1	1	1	0	1	0	9
OG0002157	0	0	1	0	0	0	0	1	1	0	0	0	0	0	0	0	3
OG0001284	0	0	0	1	0	0	0	1	1	1	0	1	0	0	1	0	4
OG0000212	1	1	0	0	1	1	1	1	0	1	0	1	0	0	1	0	7
OG0000387	1	1	1	0	0	1	0	1	1	0	0	1	1	0	1	0	6
OG0001519	0	0	0	1	1	0	1	0	1	0	1	1	0	0	1	0	4
OG0001585	1	1	0	0	1	1	1	1	1	0	1	0	0	0	0	0	7
OG0000327	1	0	0	0	1	1	1	1	1	0	1	1	1	0	1	0	6
OG0000353	1	1	1	1	1	1	1	1	1	1	0	1	1	0	0	0	10
OG0000635	1	1	0	1	1	1	1	1	1	1	1	1	1	0	0	0	9
OG0000880	1	0	1	1	1	0	1	0	1	1	1	1	1	0	1	0	7
OG0000157	1	1	1	1	0	1	1	1	1	1	1	1	0	0	0	0	9
OG0001127	1	0	1	0	1	0	1	0	1	0	1	1	1	0	1	0	5
OG0002719	0	0	1	0	0	0	0	0	0	0	0	0	0	0	0	0	1
OG0001615	1	0	0	1	0	1	0	1	1	0	0	1	1	0	1	0	5
OG0001765	1	0	0	1	0	0	0	1	1	0	0	1	1	0	1	0	4
OG0000733	0	0	1	0	1	1	0	1	1	1	1	1	1	1	1	0	6
OG0000402	1	1	1	1	1	1	1	1	1	0	1	1	0	0	1	0	9
OG0000461	1	0	0	1	1	1	1	1	1	1	1	1	1	0	1	0	8
OG0000027	1	1	0	1	1	1	1	1	1	1	1	1	1	1	1	1	9
OG0001503	0	0	1	1	0	1	1	1	0	0	1	1	1	0	1	0	5
OG0001045	1	1	0	1	0	1	1	1	0	0	0	1	1	0	1	0	6
OG0001021	1	1	0	0	0	1	1	1	1	0	1	0	0	0	1	0	6
OG0001025	1	1	1	0	0	0	1	1	0	1	1	1	1	0	1	0	6
OG0000896	1	0	1	1	0	1	1	1	1	1	1	1	0	0	1	0	8
OG0000688	1	0	1	1	1	1	1	1	1	0	1	1	0	0	1	0	8
OG0000606	1	1	0	1	1	0	1	1	1	1	1	1	1	0	1	0	8
OG0000421	1	1	1	1	1	1	1	1	1	0	1	1	1	0	1	0	9
OG0001162	1	0	1	1	1	1	1	1	1	0	1	0	0	0	0	0	8
OG0000441	1	1	1	1	1	1	1	1	1	0	1	0	1	0	1	0	9
OG0001347	1	1	0	1	0	1	0	1	1	1	1	0	0	0	1	0	7
OG0001405	1	1	1	1	1	1	1	1	0	0	0	0	1	0	0	0	8
OG0001746	1	0	1	0	0	1	1	1	1	0	1	0	0	0	0	0	6
OG0000092	1	0	0	1	1	1	1	1	1	1	1	0	0	0	1	0	8
OG0001915	0	1	0	0	1	1	1	0	1	0	0	0	0	0	0	0	5
OG0000039	0	1	0	0	1	1	1	1	0	0	1	1	1	0	1	0	5
OG0000052	0	1	0	1	1	1	1	1	1	1	1	1	1	0	1	0	8
OG0000084	1	0	0	1	1	1	1	1	1	1	1	1	1	0	1	0	8
OG0000113	1	1	0	1	0	0	1	1	1	1	1	1	1	0	1	0	7
OG0000372	1	1	0	1	1	1	1	1	1	1	1	1	0	0	0	0	9
OG0000498	0	1	1	1	1	1	1	1	1	1	1	1	0	0	0	0	9
OG0000675	1	1	1	1	0	1	1	1	1	0	1	1	1	0	1	0	8
OG0000800	1	0	0	1	0	1	1	1	1	1	1	1	1	0	1	0	7
OG0000864	1	1	1	1	0	1	1	1	1	1	1	1	0	0	0	0	9
OG0001143	1	1	1	1	0	0	1	1	0	0	1	1	1	0	1	0	6
OG0001329	1	0	0	1	1	1	1	1	1	0	1	1	0	0	0	0	7
OG0001478	0	1	1	0	0	1	1	1	1	0	1	1	0	0	1	0	6
OG0001667	0	1	0	1	1	0	1	1	0	0	1	1	0	0	1	0	5
OG0001792	0	1	1	1	0	0	0	1	1	1	1	0	0	0	0	0	6
OG0001857	1	0	0	0	0	1	1	1	1	0	0	0	1	0	0	0	5
OG0002174	0	0	0	0	0	1	1	1	0	0	0	0	0	0	0	0	3
OG0002176	0	0	0	0	0	1	1	1	0	0	0	0	0	0	0	0	3
OG0002783	0	0	0	0	0	1	0	0	0	0	0	0	0	0	0	0	1
OG0002809	0	0	0	0	0	0	1	0	0	0	0	0	0	0	0	0	1
OG0000169	1	0	0	1	1	1	1	1	1	1	1	1	1	1	1	1	8
OG0002695	0	1	0	0	0	0	0	0	0	0	0	0	0	0	0	0	1
OG0000303	0	1	1	1	1	1	1	1	1	1	1	1	1	0	1	0	9
OG0001280	0	0	0	1	1	1	0	1	1	1	0	1	1	0	1	0	6
OG0001758	1	0	0	0	1	1	1	1	1	0	1	0	0	0	0	0	6
OG0000588	1	1	0	1	1	1	1	1	1	1	1	0	0	0	1	0	9
OG0000126	0	1	1	0	1	1	1	1	1	0	1	1	1	0	1	0	7
OG0000604	1	0	0	1	1	1	1	1	1	1	1	1	0	0	1	0	8
OG0000026	1	1	0	1	1	1	1	1	1	1	1	1	1	0	1	0	9
OG0001078	1	0	0	0	1	1	1	1	1	0	1	1	1	0	1	0	6
OG0000105	1	1	1	1	1	1	1	1	1	1	1	1	1	1	1	1	10
OG0000630	1	0	0	1	1	1	1	1	1	0	1	1	0	1	1	1	7
OG0000820	1	0	1	1	0	1	1	1	1	0	1	1	1	0	1	0	7
OG0001240	0	1	1	1	1	1	1	1	1	0	0	1	0	0	1	0	8
OG0001584	1	0	0	0	1	1	0	1	1	0	1	1	0	0	1	0	5
OG0001112	1	0	0	1	0	1	0	1	1	1	1	1	1	0	1	0	6
OG0000662	1	1	0	0	0	1	1	1	1	1	1	1	1	1	1	0	7
OG0001990	0	1	0	0	0	1	1	1	1	0	0	0	0	0	0	0	5
OG0001126	1	0	1	1	0	1	1	0	1	0	1	1	1	0	1	0	6
OG0002738	0	0	0	1	0	0	0	0	0	0	0	0	0	0	0	0	1
OG0000907	1	0	0	1	1	1	1	0	1	1	1	1	0	0	1	0	7
OG0001864	1	0	0	0	1	0	1	1	1	0	1	0	0	0	0	0	5
OG0001879	1	0	0	0	1	1	1	1	1	0	0	0	0	0	0	0	6
OG0001980	1	0	0	0	0	1	1	1	1	0	0	0	0	0	0	0	5
OG0002328	0	0	0	0	0	1	0	0	0	1	0	0	0	0	0	0	2
OG0002723	0	0	1	0	0	0	0	0	0	0	0	0	0	0	0	0	1
OG0000915	1	1	0	1	1	1	1	1	1	1	1	1	0	0	0	0	9
OG0000914	1	1	0	1	1	1	1	1	1	1	1	1	0	0	0	0	9
OG0001590	1	0	0	1	0	1	1	0	1	1	1	1	0	0	0	0	6
OG0001927	0	0	0	1	1	0	1	1	0	1	0	1	0	0	0	0	5
OG0000601	1	0	0	1	1	1	1	1	0	1	1	1	1	0	1	0	7
OG0001858	1	0	1	0	0	1	1	1	1	0	0	0	0	0	0	0	6
OG0000711	0	1	0	1	1	1	0	1	1	0	1	1	1	0	1	0	6
OG0001093	1	0	1	1	0	1	0	1	1	0	1	1	1	0	1	0	6
OG0000308	0	1	1	1	0	1	1	1	1	1	1	1	1	0	1	0	8
OG0001612	1	1	0	1	0	1	0	1	0	0	1	1	1	0	0	0	5
OG0000454	1	0	1	1	1	1	1	1	1	1	1	1	1	0	1	0	9
OG0000451	1	1	1	1	1	1	1	1	1	0	1	1	1	0	1	0	9
OG0002162	0	0	0	1	0	0	0	1	1	0	0	0	0	0	0	0	3
OG0001005	0	0	0	0	1	1	1	0	1	1	1	1	1	0	1	0	5
OG0000576	1	1	0	1	1	1	1	1	1	1	1	1	1	0	0	0	9
OG0000693	0	1	0	1	1	1	1	0	1	1	1	1	1	0	1	0	7
OG0002751	0	0	0	0	1	0	0	0	0	0	0	0	0	0	0	0	1
OG0000370	1	1	1	1	1	1	1	1	1	1	1	1	0	0	1	0	10
OG0001700	0	0	0	1	1	1	1	0	1	1	0	0	0	0	1	0	6
OG0001254	0	0	1	0	1	0	1	1	1	1	1	1	0	0	1	0	6
OG0000173	1	0	1	1	1	1	1	1	1	1	1	1	1	0	1	0	9
OG0001283	0	0	0	1	1	1	1	1	1	0	1	1	1	0	1	0	6
OG0000645	1	0	1	1	1	1	1	0	1	1	1	1	1	0	1	0	8
OG0000003	1	1	1	1	1	1	1	1	1	1	1	1	1	0	1	0	10
OG0001725	1	0	0	1	0	1	1	1	0	1	1	0	0	0	0	0	6
OG0002064	1	1	0	0	1	0	0	1	0	0	0	0	0	0	0	0	4
OG0002838	0	0	0	0	0	0	0	1	0	0	0	0	0	0	0	0	1
OG0001166	1	0	0	1	1	1	1	1	1	1	1	1	0	0	0	0	8
OG0001001	0	0	0	1	0	1	1	1	1	1	1	1	1	0	1	0	6
OG0002327	0	0	0	0	0	1	0	0	0	1	0	0	0	0	0	0	2
OG0002825	0	0	0	0	0	0	1	0	0	0	0	0	0	0	0	0	1
OG0001872	1	0	0	0	1	1	1	1	1	0	0	0	0	0	0	0	6
OG0001378	1	1	0	1	1	1	1	1	1	0	1	0	0	0	0	0	8
OG0000216	1	1	0	1	1	1	1	1	1	0	1	0	0	0	1	0	8
OG0000536	1	0	0	1	0	1	1	1	1	1	1	1	0	0	1	0	7
OG0000651	1	0	1	0	1	1	1	1	1	0	1	0	1	0	1	0	7
OG0000795	1	1	0	1	1	1	1	0	1	0	1	1	0	0	1	0	7
OG0001655	0	1	0	1	1	0	1	1	1	1	1	0	0	0	0	0	7
OG0001699	0	0	0	1	0	0	1	0	1	1	1	1	1	0	1	0	4
OG0001425	1	0	0	1	0	1	1	1	1	0	0	1	1	0	1	0	6
OG0001743	1	0	0	0	0	1	1	1	1	0	1	1	0	0	0	0	5
OG0000545	1	0	1	1	1	1	0	1	1	0	1	1	1	1	1	0	7
OG0000081	1	1	1	1	1	1	1	1	1	1	1	1	0	0	1	0	10
OG0000878	1	0	1	1	0	1	1	1	1	1	0	1	1	0	1	0	8
OG0000530	1	1	0	0	0	1	1	1	1	0	1	1	1	0	1	0	6
OG0000689	1	1	1	1	1	1	1	1	1	0	1	1	1	0	0	0	9
OG0000178	1	1	1	1	1	1	0	1	1	0	1	1	1	0	1	0	8
OG0001395	1	0	0	0	1	1	0	1	1	1	1	1	1	0	0	0	6
OG0001514	0	0	0	1	1	1	1	1	0	1	0	1	1	0	1	0	6
OG0001103	1	1	0	1	0	1	1	1	1	0	0	1	1	0	1	0	7
OG0000664	1	0	0	1	1	1	0	1	1	1	1	1	0	1	1	1	7
OG0000464	1	0	1	1	1	1	0	1	1	1	1	1	0	1	1	1	8
OG0001154	1	0	0	1	1	1	0	1	1	0	1	1	0	1	1	0	6
OG0000736	0	0	0	1	1	0	1	1	1	1	1	1	1	1	1	1	6
OG0002875	0	0	0	0	0	0	0	0	0	1	0	0	0	0	0	0	1
OG0000143	1	1	0	1	1	1	1	1	1	1	1	1	1	1	1	1	9
OG0000149	1	1	0	1	1	1	1	1	1	1	1	1	1	1	1	1	9
OG0000233	1	1	0	1	1	1	1	1	1	1	1	1	0	1	1	1	9
OG0000107	1	1	1	1	1	1	1	1	1	1	1	1	1	1	1	1	10
OG0000236	1	1	0	1	1	1	1	1	1	1	1	1	0	1	1	1	9
OG0001518	0	0	0	1	1	0	1	1	0	0	1	1	0	1	1	1	4
OG0000232	1	1	0	1	1	1	1	1	1	1	1	1	0	1	1	1	9
OG0000185	1	1	0	1	1	1	1	1	1	1	1	1	1	1	1	1	9
OG0000333	1	0	0	1	1	1	1	1	1	0	1	1	1	1	1	1	7
OG0000383	1	1	0	1	0	1	1	1	1	1	1	1	0	1	1	1	8
OG0000572	1	1	0	1	1	1	1	1	1	1	1	1	0	0	1	0	9
OG0000235	1	1	0	1	1	1	1	1	1	1	1	1	1	1	1	0	9
OG0000261	1	0	0	1	1	1	1	1	1	1	1	1	1	1	1	1	8
OG0000214	1	0	1	1	1	1	1	1	1	0	1	1	1	0	1	0	8
OG0000436	1	1	0	1	1	1	1	1	0	1	1	1	0	1	1	1	8
OG0000573	1	1	0	1	1	1	1	1	1	1	1	1	0	0	1	0	9
OG0000231	1	1	0	1	1	1	1	1	1	1	1	1	0	1	1	1	9
OG0000237	1	1	0	1	1	1	1	1	1	1	1	1	1	1	1	0	9
OG0000547	1	0	1	0	0	1	1	1	1	0	1	1	1	1	1	1	6
OG0001209	0	1	0	0	1	1	1	1	1	0	0	1	0	1	1	1	6
OG0000437	1	1	0	1	1	1	0	1	0	1	1	1	1	1	1	1	7
OG0001332	1	0	1	1	0	0	0	1	1	0	1	1	0	1	0	1	5
OG0002860	0	0	0	0	0	0	0	0	1	0	0	0	0	0	0	0	1
OG0000186	1	1	0	1	1	1	1	1	1	1	1	1	1	1	1	1	9
OG0000142	1	1	0	1	1	1	1	1	1	1	1	1	0	1	1	1	9
OG0000144	1	1	0	1	1	1	1	1	1	1	1	1	1	1	1	1	9
OG0000147	1	1	0	1	1	1	1	1	1	1	1	1	1	1	1	1	9
OG0000119	1	0	1	1	1	1	1	1	1	1	1	1	1	1	1	1	9
OG0000696	0	1	0	0	1	0	1	1	1	0	1	1	1	1	1	1	5
OG0001237	0	1	1	1	1	0	0	1	0	1	1	1	0	0	0	0	6
OG0000647	1	0	1	1	1	1	0	1	1	1	1	1	1	0	1	0	8
OG0001729	1	0	0	1	1	0	1	1	1	1	0	0	0	0	0	0	7
OG0000122	1	1	0	0	1	1	1	1	1	1	1	1	1	1	1	1	8
OG0000406	1	1	1	1	1	0	1	0	0	1	0	1	1	0	1	0	7
OG0000014	1	1	0	0	0	1	1	1	1	0	1	1	0	0	1	0	6
OG0001660	0	1	0	0	0	1	1	0	0	1	1	1	1	0	1	0	4
OG0000507	0	0	0	1	1	1	1	1	1	0	1	1	1	0	0	0	6
OG0001712	0	0	0	0	1	1	0	0	1	1	1	1	1	0	1	0	4
OG0000190	1	1	1	1	0	1	1	1	1	1	1	1	1	1	1	1	9
OG0001350	1	0	0	0	1	0	1	1	1	0	1	1	1	0	1	0	5
OG0000972	0	1	1	1	1	0	1	1	1	0	1	1	0	1	1	0	7
OG0000120	1	1	1	1	1	1	1	1	1	1	1	1	1	0	1	0	10
OG0000290	1	0	0	1	0	1	1	1	1	0	1	1	1	0	1	0	6
OG0001677	0	1	1	1	1	1	1	0	0	1	0	1	0	0	0	0	7
OG0001705	0	0	0	1	1	0	1	1	1	0	1	1	1	0	0	0	5
OG0000206	1	1	1	1	1	1	1	1	1	1	1	1	1	0	1	0	10
OG0000491	0	1	0	1	1	0	1	1	1	1	1	1	1	0	1	0	7
OG0001156	1	1	0	1	1	0	1	0	1	0	1	1	1	0	1	0	6
OG0000959	0	1	1	1	1	1	0	1	0	0	0	1	1	1	1	1	6
OG0000891	1	1	1	1	1	1	1	1	0	1	0	1	0	0	1	0	9
OG0000660	1	0	0	1	1	1	1	1	1	1	1	1	1	0	1	0	8
OG0001494	0	1	1	1	1	1	0	1	0	0	1	1	0	0	1	0	6
OG0000348	1	1	0	1	1	1	1	1	1	1	1	1	1	0	1	0	9
OG0001501	0	0	1	1	0	1	1	1	1	0	1	0	1	0	0	0	6
OG0001096	1	0	0	1	1	1	1	1	1	1	1	0	0	0	1	0	8
OG0001259	0	0	1	1	0	1	0	1	1	0	1	1	1	0	1	0	5
OG0001962	1	0	0	0	0	1	1	0	1	0	1	0	0	0	0	0	4
OG0001922	0	0	1	1	0	0	0	1	0	0	1	0	1	0	0	0	3
OG0000981	0	1	1	0	1	1	1	1	1	0	1	1	1	0	1	0	7
OG0000330	1	0	0	0	1	1	1	1	1	0	1	1	1	1	1	0	6
OG0001010	1	0	1	1	1	1	1	1	1	1	1	0	0	0	0	0	9
OG0001704	0	0	0	1	1	0	1	1	1	1	1	1	0	0	0	0	6
OG0000136	1	1	0	1	1	1	1	1	1	1	1	1	1	0	1	0	9
OG0001646	0	1	1	1	0	1	1	0	0	1	0	1	1	0	0	0	6
OG0000596	1	0	1	1	1	1	0	1	1	1	1	1	1	0	1	0	8
OG0000513	1	1	1	1	1	0	1	1	1	0	1	1	1	0	1	0	8
OG0001113	1	0	0	0	1	1	0	1	1	1	1	1	1	0	1	0	6
OG0002026	0	0	0	0	1	0	0	1	1	1	1	0	0	0	0	0	4
OG0002168	0	0	0	0	1	0	0	0	1	0	1	0	0	0	0	0	2
OG0001404	1	1	1	0	1	1	1	1	0	0	1	0	0	0	1	0	7
OG0001069	1	1	0	1	1	1	1	1	1	1	1	0	0	0	0	0	9
OG0001363	1	0	1	1	0	1	1	1	1	0	1	0	0	0	1	0	7
OG0000780	1	0	1	0	1	1	1	1	1	1	1	0	0	0	0	0	8
OG0000194	1	1	1	1	0	1	1	1	1	1	1	1	0	0	0	0	9
OG0000175	1	1	0	1	1	1	1	1	1	1	1	1	0	0	1	0	9
OG0000833	1	1	0	1	1	1	0	1	1	1	1	0	0	0	0	0	8
OG0000834	1	1	0	1	1	1	0	1	1	1	1	0	0	0	0	0	8
OG0000884	1	1	0	1	1	1	1	1	1	1	1	1	0	0	0	0	9
OG0001124	1	1	0	1	1	1	1	0	1	1	1	1	0	0	0	0	8
OG0001407	1	0	0	1	1	1	1	1	1	1	0	1	0	0	0	0	8
OG0000368	1	1	1	1	1	1	1	1	1	1	0	1	1	0	1	0	10
OG0001043	1	1	0	1	1	1	1	1	0	0	0	0	0	0	0	0	7
OG0002837	0	0	0	0	0	0	0	1	0	0	0	0	0	0	0	0	1
OG0000500	0	1	0	1	1	1	1	1	1	1	1	1	1	0	1	0	8
OG0000316	1	1	1	1	1	1	1	1	1	0	1	1	1	0	1	0	9
OG0000317	1	1	1	1	1	1	1	1	1	0	1	1	1	0	1	0	9
OG0001200	0	1	0	1	1	1	1	1	1	0	1	1	0	0	1	0	7
OG0000919	1	1	0	1	1	1	1	1	1	1	1	1	0	0	0	0	9
OG0000975	0	1	0	0	1	1	1	1	1	1	1	1	1	0	1	0	7
OG0001147	1	0	0	0	1	1	1	1	1	1	1	1	0	0	1	0	7
OG0001839	0	0	0	0	1	1	1	1	0	1	1	1	0	0	0	0	5
OG0001255	0	0	1	1	1	1	1	1	0	1	1	0	0	0	1	0	7
OG0000490	0	1	0	1	1	0	1	1	1	1	1	1	0	0	1	0	7
OG0001577	1	1	0	1	1	0	1	1	0	1	1	0	0	0	0	0	7
OG0002700	0	1	0	0	0	0	0	0	0	0	0	0	0	0	0	0	1
OG0000838	1	1	0	0	1	1	1	1	1	1	0	1	1	0	0	0	8
OG0002014	0	0	1	1	0	0	0	1	0	1	0	0	0	0	0	0	4
OG0002024	0	0	0	1	1	0	0	0	1	0	0	1	0	0	1	0	3
OG0000999	0	0	0	1	1	1	1	0	1	0	0	1	1	1	1	1	5
OG0000508	0	0	0	0	0	1	1	0	1	0	1	1	1	0	1	0	3
OG0000239	1	0	1	1	1	1	1	1	1	0	1	1	1	1	1	0	8
OG0001691	0	0	1	1	0	1	1	1	1	0	0	1	0	0	1	0	6
OG0001472	0	1	0	0	1	0	1	1	0	1	1	1	1	0	1	0	5
OG0000289	1	1	1	0	0	1	1	1	1	1	1	1	1	0	1	0	8
OG0000766	1	0	1	1	0	1	0	1	1	0	1	1	1	0	1	0	6
OG0001243	0	1	0	0	1	0	1	1	1	1	1	1	0	0	1	0	6
OG0000642	1	1	1	1	0	1	1	0	1	1	1	1	1	0	1	0	8
OG0000246	1	0	1	1	0	1	1	1	1	0	1	1	1	0	1	0	7
OG0000579	1	0	1	1	1	1	1	1	1	1	1	1	0	0	1	0	9
OG0000580	1	0	1	1	1	1	1	1	1	0	1	1	0	0	1	0	8
OG0000656	1	1	1	1	1	1	1	0	1	1	1	1	0	0	1	0	9
OG0000716	0	1	1	1	1	0	0	0	1	0	1	1	1	1	1	1	5
OG0000830	1	1	1	1	1	1	0	1	1	0	0	0	0	0	0	0	8
OG0001328	1	0	1	1	1	1	1	1	1	0	1	0	0	0	0	0	8
OG0001473	0	1	0	1	1	0	1	1	1	1	0	1	0	0	1	0	7
OG0000472	1	1	1	1	1	1	1	1	1	1	1	0	1	0	1	0	10
OG0002067	0	1	1	0	0	0	0	1	0	0	0	0	0	0	0	0	3
OG0000616	1	1	0	1	1	1	1	1	1	0	1	1	1	0	1	0	8
OG0001372	1	0	0	1	0	1	1	1	1	1	1	1	0	0	0	0	7
OG0001214	0	1	1	1	1	0	0	1	0	1	1	1	1	0	1	0	6
OG0001183	1	0	1	1	0	1	1	1	0	0	1	1	0	0	1	0	6
OG0000061	1	1	0	1	1	1	1	1	1	1	1	1	1	1	1	1	9
OG0000737	0	0	0	0	1	1	1	1	1	1	1	1	1	1	1	1	6
OG0000140	1	1	0	1	1	1	1	1	1	1	1	1	1	0	1	1	9
OG0000954	0	1	1	0	1	1	1	1	0	0	1	1	1	1	0	1	6
OG0002828	0	0	0	0	0	0	1	0	0	0	0	0	0	0	0	0	1
OG0000560	1	0	1	0	1	1	1	1	1	1	1	1	0	1	1	0	8
OG0002686	1	0	0	0	0	0	0	0	0	0	0	0	0	0	0	0	1
OG0000559	1	0	1	0	1	1	1	1	1	1	1	1	0	1	1	0	8
OG0000162	1	0	1	0	1	1	1	1	1	1	1	1	1	1	1	0	8
OG0000356	1	0	1	0	1	1	1	1	1	1	1	1	0	1	1	0	8
OG0001210	0	1	1	1	1	1	1	1	1	1	1	0	0	0	0	0	9
OG0000179	1	0	1	1	1	1	1	1	1	1	1	1	1	0	1	0	9
OG0000455	1	0	1	1	0	1	1	1	1	1	1	1	1	0	1	0	8
OG0000067	0	1	0	1	1	1	1	1	1	0	1	1	1	0	1	0	7
OG0002295	0	1	0	0	0	0	0	0	0	0	1	0	0	0	0	0	1
OG0002740	0	0	0	1	0	0	0	0	0	0	0	0	0	0	0	0	1
OG0001239	0	1	1	1	0	1	1	1	1	0	0	1	1	0	1	0	7
OG0002753	0	0	0	0	1	0	0	0	0	0	0	0	0	0	0	0	1
OG0001992	0	1	0	0	0	0	0	0	0	0	0	1	1	0	1	0	1
OG0001161	1	0	1	1	1	1	1	1	0	0	1	1	0	0	1	0	7
OG0001179	1	1	0	1	0	1	1	1	1	1	1	1	0	0	0	0	8
OG0000481	1	1	0	1	0	1	1	1	1	0	1	1	1	0	1	0	7
OG0001180	1	1	0	1	0	1	1	1	1	0	1	1	0	0	1	0	7
OG0000615	1	1	0	1	1	0	1	1	1	1	1	1	1	0	0	0	8
OG0000869	1	0	0	1	0	1	1	1	1	1	1	1	1	0	1	0	7
OG0001443	1	0	1	1	0	1	1	1	1	1	1	0	0	0	0	0	8
OG0002728	0	0	0	1	0	0	0	0	0	0	0	0	0	0	0	0	1
OG0000177	1	0	1	1	1	1	0	1	1	1	1	1	1	0	1	0	8
OG0000774	1	0	1	1	0	1	1	1	1	1	1	1	0	0	1	0	8
OG0000924	1	1	0	1	1	1	1	1	1	1	1	1	0	0	0	0	9
OG0001049	1	0	1	0	1	0	0	1	0	0	1	1	1	0	1	0	4
OG0001458	0	1	0	1	1	1	1	0	0	1	1	1	0	0	0	0	6
OG0000247	1	1	1	1	1	1	1	1	1	1	1	1	0	1	1	0	10
OG0001481	0	1	0	1	0	1	0	1	1	0	1	1	1	0	1	0	5
OG0000307	0	1	1	1	1	1	1	1	0	0	1	1	1	0	1	0	7
OG0000944	1	1	0	0	1	1	1	1	1	0	1	1	1	0	1	0	7
OG0000551	1	1	1	1	1	1	1	1	1	1	0	1	1	0	0	0	10
OG0000989	0	0	1	1	1	1	1	1	0	1	1	1	0	0	1	0	7
OG0001661	0	1	0	1	1	1	1	1	1	0	1	0	0	0	0	0	7
OG0001697	0	0	0	1	1	1	1	1	1	1	0	1	0	0	0	0	7
OG0001827	0	0	1	0	1	1	0	1	0	0	1	1	0	0	1	0	4
OG0001058	1	1	1	0	1	1	1	1	1	0	1	1	0	0	0	0	8
OG0002684	1	0	0	0	0	0	0	0	0	0	0	0	0	0	0	0	1
OG0000801	1	1	1	0	1	1	1	1	1	0	1	1	0	0	0	0	8
OG0001335	1	1	0	0	1	1	1	1	1	0	1	1	0	0	0	0	7
OG0001059	1	1	0	1	1	1	1	1	1	0	1	1	0	0	0	0	8
OG0001060	1	1	0	1	1	1	1	1	1	0	1	1	0	0	0	0	8
OG0000802	1	1	1	1	1	1	1	1	1	0	1	1	0	0	0	0	9
OG0001470	0	1	0	0	1	1	1	1	0	0	1	1	1	0	1	0	5
OG0001452	1	0	0	0	1	0	1	1	1	0	1	1	1	0	1	0	5
OG0001002	0	0	0	1	1	1	1	1	1	1	0	1	1	0	1	0	7
OG0002815	0	0	0	0	0	0	1	0	0	0	0	0	0	0	0	0	1
OG0001174	1	0	0	1	1	1	1	1	1	0	1	1	0	0	1	0	7
OG0001804	0	1	0	1	1	1	0	1	1	0	0	0	1	0	0	0	6
OG0000714	0	1	1	1	1	1	1	1	1	0	1	1	0	0	1	0	8
OG0001213	0	1	1	1	1	0	0	1	0	1	1	1	0	0	1	0	6
OG0001242	0	1	0	1	1	1	1	1	1	0	1	1	0	0	1	0	7
OG0001276	0	0	0	1	0	1	1	1	1	1	1	1	0	0	0	0	6
OG0000476	1	1	1	1	1	1	1	1	1	1	1	1	0	0	1	0	10
OG0002030	0	0	0	0	0	1	1	1	0	0	1	0	0	0	1	0	3
OG0001035	1	0	1	0	0	1	1	1	1	0	1	1	1	0	1	0	6
OG0000949	1	0	0	1	1	1	1	0	1	0	1	1	1	0	1	0	6
OG0001614	1	0	1	0	1	1	0	1	1	0	0	1	0	0	0	0	6
OG0000932	1	1	0	0	0	1	1	1	1	0	1	1	1	0	1	0	6
OG0001807	0	1	1	0	0	1	1	1	1	0	1	0	0	0	0	0	6
OG0000265	1	1	0	1	1	1	1	1	1	1	1	1	0	0	1	0	9
OG0001125	1	0	1	1	0	1	1	0	1	0	1	1	1	0	1	0	6
OG0001146	1	0	0	0	1	1	1	1	1	1	1	1	0	0	1	0	7
OG0001836	0	0	0	1	0	0	1	1	0	1	0	1	1	0	1	0	4
OG0001182	1	0	1	1	1	1	1	1	1	0	1	0	0	0	0	0	8
OG0000555	1	1	0	1	0	1	1	1	1	0	1	1	0	0	0	0	7
OG0001800	0	1	0	0	0	0	1	1	0	0	0	1	0	0	1	0	3
OG0000556	1	1	1	0	0	1	1	1	1	1	1	1	1	0	1	0	8
OG0001130	1	0	1	0	1	0	1	1	1	0	1	1	1	0	1	0	6
OG0001707	0	0	0	1	1	0	1	1	0	0	1	1	1	0	1	0	4
OG0000139	1	0	1	1	1	1	1	1	1	1	1	1	1	0	1	0	9
OG0000525	1	0	1	1	1	1	0	1	1	1	1	1	1	0	1	0	8
OG0001873	1	0	0	0	1	1	1	1	1	0	0	0	0	0	0	0	6
OG0001373	1	0	0	1	0	1	1	1	1	1	1	1	0	0	0	0	7
OG0001647	0	1	0	1	0	0	0	1	0	1	0	1	0	0	1	0	4
OG0001941	0	0	0	0	0	1	0	1	1	0	1	1	1	0	0	0	3
OG0000593	1	1	0	1	1	1	1	1	1	1	1	1	0	0	0	0	9
OG0000985	0	0	1	1	1	1	1	1	1	0	1	1	0	0	0	0	7
OG0001394	1	1	0	1	0	1	0	1	1	0	1	1	1	0	0	0	6
OG0001938	0	0	0	0	1	1	1	1	0	1	1	0	0	0	0	0	5
OG0002812	0	0	0	0	0	0	1	0	0	0	0	0	0	0	0	0	1
OG0000388	1	1	0	1	0	1	1	1	1	0	0	1	0	0	1	0	7
OG0000629	1	1	0	1	1	1	1	1	1	1	1	0	1	0	0	0	9
OG0000760	1	0	0	1	1	1	1	1	1	1	1	1	0	0	0	0	8
OG0001191	1	1	1	1	0	1	1	1	1	0	1	1	0	0	0	0	8
OG0001549	1	0	1	0	0	1	1	1	1	1	0	0	0	0	1	0	7
OG0002814	0	0	0	0	0	0	1	0	0	0	0	0	0	0	0	0	1
OG0000425	1	1	1	1	1	1	1	1	1	1	1	1	0	0	1	0	10
OG0001536	1	1	0	0	0	1	1	1	1	0	1	1	0	0	0	0	6
OG0002735	0	0	0	1	0	0	0	0	0	0	0	0	0	0	0	0	1
OG0000610	1	0	1	1	0	1	1	1	1	1	1	1	1	0	1	0	8
OG0000993	0	0	1	1	0	1	0	1	1	0	1	1	1	0	1	0	5
OG0001487	0	1	0	0	0	1	1	1	0	1	1	1	1	0	1	0	5
OG0000274	1	1	1	1	1	1	1	1	1	1	1	1	1	0	1	0	10
OG0000848	1	0	0	1	1	1	1	1	0	1	1	1	1	0	1	0	7
OG0000484	0	1	0	1	1	1	1	0	1	1	1	1	1	0	1	0	7
OG0000463	1	0	0	1	0	1	1	1	1	0	1	1	0	0	1	0	6
OG0001737	1	1	0	1	0	1	1	1	0	0	1	0	0	0	0	0	6
OG0000649	1	1	1	1	1	1	1	1	1	1	1	1	0	0	0	0	10
OG0000665	1	1	1	1	0	1	0	1	0	1	1	1	1	0	1	0	7
OG0000879	1	0	1	1	0	0	1	0	1	1	1	1	1	0	1	0	6
OG0001114	1	0	1	1	0	0	1	0	1	1	1	1	1	0	1	0	6
OG0000241	1	0	1	1	1	1	1	1	0	1	1	1	1	0	1	0	8
OG0000865	1	0	1	1	0	1	0	1	1	1	1	1	1	0	1	0	7
OG0000471	1	1	1	1	0	0	1	0	1	1	1	1	1	1	1	1	7
OG0000895	1	1	0	1	1	1	1	1	1	0	1	1	1	0	0	0	8
OG0000777	1	0	1	0	0	1	1	1	1	1	0	1	1	0	0	0	7
OG0000006	0	1	0	1	1	1	1	1	1	0	1	1	1	0	1	0	7
OG0000495	0	1	0	1	0	0	0	1	1	1	1	1	1	0	1	0	5
OG0000930	1	1	0	1	1	0	1	1	1	1	1	1	1	0	0	0	8
OG0001490	0	1	0	1	1	1	1	0	1	1	0	1	0	0	0	0	7
OG0000200	0	1	0	0	1	0	0	1	1	0	1	1	1	0	1	0	4
OG0000242	1	0	1	1	1	1	1	1	1	1	1	1	1	0	1	0	9
OG0000479	1	0	1	1	1	1	1	1	1	0	1	0	0	0	0	0	8
OG0001408	1	1	0	1	1	1	1	1	1	1	0	0	0	0	0	0	9
OG0001910	0	1	1	1	1	0	0	1	0	0	1	0	0	0	0	0	5
OG0000885	1	1	0	1	1	1	1	1	1	1	1	1	0	0	0	0	9
OG0000401	1	1	1	1	1	1	1	1	1	0	1	1	1	0	0	0	9
OG0000031	1	1	1	1	1	1	1	1	1	0	0	1	1	0	1	0	9
OG0000161	1	0	1	1	0	1	1	1	1	1	1	1	0	0	0	0	8
OG0000172	1	1	1	1	1	1	0	1	1	0	1	1	0	0	1	0	8
OG0000339	1	1	1	1	0	1	1	1	1	1	1	1	0	0	1	0	9
OG0000741	1	1	0	1	1	1	1	1	1	0	1	1	1	0	0	0	8
OG0001920	0	0	1	1	0	1	1	1	1	0	0	0	0	0	0	0	6
OG0002159	0	0	1	1	0	0	0	0	0	1	0	0	0	0	0	0	3
OG0001121	1	0	0	1	0	1	1	1	1	1	1	1	1	0	0	0	7
OG0000130	1	1	0	1	1	1	1	1	1	1	1	1	0	0	1	0	9
OG0002184	0	0	0	0	0	0	1	1	1	0	0	0	0	0	0	0	3
OG0000633	1	1	0	0	1	1	0	1	1	1	1	1	1	0	1	0	7
OG0000310	0	0	1	1	1	1	1	1	1	1	1	1	1	0	1	0	8
OG0000276	1	1	1	1	1	1	1	1	1	1	1	1	1	0	1	0	10
OG0001468	0	1	0	0	0	1	1	1	1	1	1	1	0	0	1	0	6
OG0001398	1	0	0	1	1	1	1	1	1	1	1	0	0	0	0	0	8
OG0002742	0	0	0	1	0	0	0	0	0	0	0	0	0	0	0	0	1
OG0000201	0	1	1	0	0	1	1	1	1	1	1	1	1	1	1	1	7
OG0000962	0	1	0	1	1	1	0	1	1	1	1	1	1	0	1	0	7
OG0000062	1	1	1	0	1	1	0	1	1	1	0	1	1	0	1	0	8
OG0000321	1	1	1	1	1	1	1	1	1	0	1	1	1	0	1	0	9
OG0002062	1	0	1	0	0	0	1	1	0	0	0	0	0	0	0	0	4
OG0000044	1	1	1	0	1	1	1	1	1	1	1	1	1	0	1	0	9
OG0000099	1	0	1	1	0	1	1	1	1	1	1	1	1	1	1	1	8
OG0000836	1	1	0	1	1	1	1	1	1	0	1	1	0	0	1	0	8
OG0000299	1	1	1	1	1	1	0	1	1	0	1	1	1	1	1	1	8
OG0001524	0	0	0	0	1	1	0	1	1	0	1	1	1	0	1	0	4
OG0000769	1	1	1	1	1	1	1	1	0	0	1	1	0	0	1	0	8
OG0000280	1	1	1	1	1	1	1	0	1	1	1	1	1	0	1	0	9
OG0000765	1	0	0	1	1	1	1	1	1	1	1	1	0	0	1	0	8
OG0000319	1	1	1	0	1	1	1	1	1	0	1	1	1	0	1	0	8
OG0000957	0	1	0	1	1	1	1	1	1	0	1	1	1	0	1	0	7
OG0002720	0	0	1	0	0	0	0	0	0	0	0	0	0	0	0	0	1
OG0002721	0	0	1	0	0	0	0	0	0	0	0	0	0	0	0	0	1
OG0000923	1	0	0	0	0	1	1	1	1	0	1	1	1	0	1	0	5
OG0000309	0	1	1	1	1	1	1	1	1	1	1	1	0	0	1	0	9
OG0000744	1	0	1	1	1	0	1	1	1	1	1	1	1	0	0	0	8
OG0001281	0	0	0	1	1	1	1	1	1	0	1	1	1	0	1	0	6
OG0001282	0	0	0	1	1	1	1	1	1	0	1	1	1	0	0	0	6
OG0000127	0	0	0	1	0	1	1	1	1	1	1	1	0	0	1	0	6
OG0000453	1	1	1	1	1	1	1	1	1	0	1	1	1	0	1	0	9
OG0000434	1	1	0	1	0	1	1	1	1	1	1	1	1	0	1	0	8
OG0001305	1	0	0	1	0	1	0	1	1	0	1	1	1	0	1	0	5
OG0000991	0	0	1	1	1	1	1	1	1	1	1	1	0	0	1	0	8
OG0002683	1	0	0	0	0	0	0	0	0	0	0	0	0	0	0	0	1
OG0002834	0	0	0	0	0	0	1	0	0	0	0	0	0	0	0	0	1
OG0001122	1	0	0	1	0	1	1	1	1	1	1	1	0	0	0	0	7
OG0000984	0	0	1	0	0	1	1	1	1	1	1	1	1	1	1	0	6
OG0000548	1	0	0	1	1	1	1	1	1	0	1	1	1	1	1	0	7
OG0001512	0	0	0	1	1	1	1	1	1	0	1	1	0	0	0	0	6
OG0001479	0	1	0	1	0	1	0	1	0	1	1	1	1	0	1	0	5
OG0001491	0	1	1	1	1	0	1	1	0	0	1	1	0	0	1	0	6
OG0000921	1	1	0	1	0	1	1	1	1	1	1	1	0	0	0	0	8
OG0000446	1	1	1	1	1	1	1	1	0	1	0	1	1	0	1	0	9
OG0000890	1	1	1	1	1	0	1	0	0	1	1	1	1	0	1	0	7
OG0001868	1	0	0	1	0	1	1	1	1	0	0	0	0	0	0	0	6
OG0000361	1	1	1	1	1	1	1	1	0	1	0	1	0	0	0	0	9
OG0000313	1	1	0	1	1	1	1	1	1	1	1	1	0	0	1	0	9
OG0001071	1	0	0	1	1	1	0	1	1	0	1	0	0	0	1	0	6
OG0001706	0	0	0	1	1	0	1	1	0	0	1	1	1	0	1	0	4
OG0001197	0	1	1	0	1	1	1	1	0	0	1	1	0	0	1	0	6
OG0000707	0	1	1	1	1	1	1	1	0	1	1	1	0	0	1	0	8
OG0000676	1	1	1	1	0	1	1	1	1	0	1	1	1	0	1	0	8
OG0001475	0	1	0	0	0	1	1	1	1	1	1	1	0	0	1	0	6
OG0000336	1	0	1	1	0	1	1	1	1	1	1	1	1	0	1	0	8
OG0001014	1	0	0	0	0	1	1	1	1	1	1	1	1	0	1	0	6
OG0001933	0	0	0	1	1	0	1	0	0	0	0	1	1	0	1	0	3
OG0000413	1	0	1	0	1	1	1	1	1	1	1	1	1	0	1	0	8
OG0001357	1	1	0	1	0	1	1	1	1	0	0	1	0	0	1	0	7
OG0001105	1	0	1	0	1	1	1	1	0	0	1	1	1	0	1	0	6
OG0000517	1	1	0	1	1	1	1	1	1	1	1	1	0	0	1	0	9
OG0000211	1	1	0	0	1	1	1	1	1	1	1	1	0	0	1	0	8
OG0000324	1	1	1	1	1	1	1	1	1	0	1	1	1	0	1	0	9
OG0001680	0	1	1	1	1	0	0	1	0	0	1	1	0	0	1	0	5
OG0001164	1	0	0	0	0	1	1	1	1	0	1	1	1	0	1	0	5
OG0000349	1	0	0	1	0	1	1	1	1	1	1	1	1	0	0	0	7
OG0001682	0	0	1	1	0	1	1	1	1	1	0	0	1	0	0	0	7
OG0002041	0	0	0	0	0	0	1	1	1	0	0	0	1	0	1	0	3
OG0001346	1	1	1	1	1	0	1	1	0	1	0	1	0	0	0	0	8
OG0000775	1	0	1	1	0	1	0	1	1	0	1	1	1	0	1	1	6
OG0000669	1	1	1	1	1	0	1	0	1	1	1	1	1	0	1	0	8
OG0002744	0	0	0	0	1	0	0	0	0	0	0	0	0	0	0	0	1
OG0000045	1	1	1	1	1	1	1	1	1	1	1	1	1	0	1	0	10
OG0001097	1	0	0	1	0	1	1	1	1	1	1	1	0	0	1	0	7
OG0001380	1	0	1	1	1	1	1	1	1	0	1	0	0	0	0	0	8
OG0000391	1	1	0	1	1	1	1	1	1	1	1	1	1	0	0	0	9
OG0000394	1	1	0	1	1	1	1	1	0	0	1	1	1	0	0	0	7
OG0000837	1	1	0	1	1	1	1	1	0	0	1	1	1	0	0	0	7
OG0001366	1	1	0	1	0	1	0	1	0	0	1	1	1	0	1	0	5
OG0000747	1	0	0	0	1	1	1	1	1	0	1	1	1	0	1	0	6
OG0001052	1	0	1	1	1	1	1	1	1	1	1	0	0	0	0	0	9
OG0001300	1	1	0	1	1	1	1	1	1	0	1	0	0	0	0	0	8
OG0001459	0	1	0	1	1	1	1	0	0	0	1	1	0	0	1	0	5
OG0001467	0	1	0	1	1	1	1	1	1	0	1	1	0	0	0	0	7
OG0001520	0	0	0	1	1	0	1	1	0	1	0	1	1	0	1	0	5
OG0000001	1	1	1	1	1	1	1	1	1	1	1	1	0	0	0	0	10
OG0000043	1	1	0	1	1	0	1	1	1	1	1	1	1	0	0	0	8
OG0000070	1	1	1	1	1	1	1	1	1	0	1	1	1	0	1	0	9
OG0001905	0	1	0	0	1	1	0	1	1	0	1	0	0	0	0	0	5
OG0000060	1	1	1	1	1	1	1	1	1	1	1	1	1	0	0	0	10
OG0000564	1	1	0	1	1	1	1	1	1	1	1	0	0	0	0	0	9
OG0002752	0	0	0	0	1	0	0	0	0	0	0	0	0	0	0	0	1
OG0001186	1	1	0	1	0	0	0	1	0	1	0	1	1	0	1	0	5
OG0000440	1	1	0	1	1	1	1	1	1	1	1	1	1	0	1	0	9
OG0000947	1	1	0	0	1	1	1	1	1	0	1	1	0	0	1	0	7
OG0000677	1	1	1	1	0	1	1	1	1	0	1	1	1	0	1	0	8
OG0000785	1	0	1	0	0	1	1	1	1	0	1	1	0	1	1	1	6
OG0001991	0	1	0	0	0	0	0	0	0	0	0	1	1	0	1	0	1
OG0002811	0	0	0	0	0	0	1	0	0	0	0	0	0	0	0	0	1
OG0001764	1	0	0	1	0	0	0	1	1	0	0	1	1	0	1	0	4
OG0001410	1	0	0	0	1	0	1	1	1	0	1	1	1	0	1	0	5
OG0000358	1	1	0	1	0	1	1	1	0	0	1	1	1	0	1	0	6
OG0000168	1	1	0	1	1	1	1	1	1	0	1	1	0	0	0	0	8
OG0000614	1	1	1	1	1	1	1	1	1	1	1	0	1	0	0	0	10
OG0001562	1	1	1	0	1	1	1	1	1	0	0	0	0	0	0	0	8
OG0002177	0	0	0	0	0	1	0	1	1	0	0	0	0	0	0	0	3
OG0001784	0	1	0	1	0	1	1	1	1	0	0	1	0	0	0	0	6
OG0001428	1	0	0	0	1	1	1	1	1	0	0	1	0	0	1	0	6
OG0000653	1	1	1	1	1	1	1	1	1	0	1	0	0	0	0	0	9
OG0000738	1	1	1	1	1	1	1	1	1	0	1	0	0	0	1	0	9
OG0001142	1	1	0	0	1	1	1	0	1	1	1	1	0	0	1	0	7
OG0001188	1	1	1	1	1	0	0	1	0	1	0	1	1	0	0	0	7
OG0000916	1	1	0	0	0	1	1	1	1	1	1	1	1	0	1	0	7
OG0002672	1	0	0	0	0	0	0	0	0	0	0	0	0	0	0	0	1
OG0002824	0	0	0	0	0	0	1	0	0	0	0	0	0	0	0	0	1
OG0002309	0	0	0	0	1	1	0	0	0	0	0	0	0	0	0	0	2
OG0002779	0	0	0	0	0	1	0	0	0	0	0	0	0	0	0	0	1
OG0000221	1	0	1	1	1	0	1	1	1	0	1	1	0	0	0	0	7
OG0000761	1	0	0	0	1	1	1	1	0	0	1	1	1	0	1	0	5
OG0002755	0	0	0	0	1	0	0	0	0	0	0	0	0	0	0	0	1
OG0001781	1	1	0	0	0	1	1	0	0	0	1	1	1	0	0	0	4
OG0001430	1	0	0	1	1	1	0	1	0	1	0	1	0	0	0	0	6
OG0000493	0	1	1	0	1	0	1	1	1	1	1	1	1	0	1	0	7
OG0000771	1	1	0	0	0	1	1	1	1	0	1	1	1	0	0	0	6
OG0000269	1	1	0	1	0	1	1	1	1	1	1	1	1	0	1	0	8
OG0001613	1	1	1	0	1	1	1	1	1	0	0	0	0	0	0	0	8
OG0001659	0	1	0	0	0	1	1	1	1	1	1	1	0	0	0	0	6
OG0001263	0	0	1	1	1	1	1	1	1	0	1	1	0	0	1	0	7
OG0000054	1	0	1	1	1	1	1	1	1	1	1	1	1	0	1	0	9
OG0001442	1	0	1	1	0	1	1	1	1	1	1	0	0	0	0	0	8
OG0001344	1	0	0	0	0	1	0	1	1	0	1	1	1	0	1	0	4
OG0001101	1	0	1	1	1	1	1	1	1	0	1	0	0	0	1	0	8
OG0001791	0	1	0	1	1	0	1	1	0	1	0	0	0	0	1	0	6
OG0000288	1	1	0	1	1	1	1	1	1	1	1	1	1	0	1	0	9
OG0000390	1	1	0	1	1	1	1	1	1	1	1	1	1	0	1	0	9
OG0000196	1	0	1	1	1	1	1	1	1	0	1	1	1	0	1	0	8
OG0000332	1	0	0	1	1	1	1	1	1	0	1	1	1	1	1	1	7
OG0000527	1	0	1	1	1	1	1	1	1	0	1	1	0	1	1	0	8
OG0000754	1	0	1	1	1	1	1	1	1	0	1	1	0	0	1	0	8
OG0000522	1	0	1	1	0	1	1	1	1	1	1	1	1	0	1	0	8
OG0001032	1	0	1	1	1	0	0	1	0	0	1	1	0	1	1	1	5
OG0002846	0	0	0	0	0	0	0	1	0	0	0	0	0	0	0	0	1
OG0000917	1	0	0	1	1	1	0	1	1	0	1	1	0	1	1	1	6
OG0001757	1	0	0	0	1	1	1	1	0	0	0	1	0	0	1	0	5
OG0000080	1	1	1	1	1	1	1	1	1	1	1	1	1	1	1	1	10
OG0001665	0	1	0	1	0	1	0	0	1	0	1	1	1	0	1	0	4
OG0000776	1	0	0	1	0	1	1	1	1	1	1	1	1	0	1	0	7
OG0000171	1	0	0	1	1	1	1	1	1	1	1	1	1	0	1	0	8
OG0001038	1	0	0	1	0	1	1	1	1	0	1	1	0	1	1	0	6
OG0000220	1	1	0	1	1	1	1	1	1	1	1	1	1	1	1	0	9
OG0002867	0	0	0	0	0	0	0	0	0	1	0	0	0	0	0	0	1
OG0000049	1	0	0	1	1	1	1	1	1	0	1	1	1	0	1	0	7
OG0001831	0	0	0	1	0	1	1	1	1	0	1	0	0	0	1	0	5
OG0000856	1	0	1	1	0	1	1	1	1	1	1	1	1	0	0	0	8
OG0001861	1	0	1	1	0	1	0	1	1	0	0	0	0	0	0	0	6
OG0002013	0	0	1	1	0	1	0	1	1	0	0	0	0	0	0	0	5
OG0000922	1	1	1	0	1	1	1	1	1	0	0	1	1	0	1	0	8
OG0001794	0	1	1	1	0	0	0	1	0	1	0	1	0	0	1	0	5
OG0001131	1	0	1	1	0	1	1	1	1	1	1	1	0	0	0	0	8
OG0001456	0	1	0	1	1	0	1	0	1	0	1	1	1	0	1	0	5
OG0001353	1	0	0	0	1	1	0	1	1	0	1	1	1	0	1	0	5
OG0001445	1	0	1	1	1	1	1	1	1	0	1	0	0	0	0	0	8
OG0001686	0	0	1	1	0	1	1	1	0	1	1	1	0	0	0	0	6
OG0000622	1	0	0	1	1	1	1	1	1	1	1	1	1	0	1	0	8
OG0000019	1	1	1	1	0	1	1	1	1	1	1	1	1	0	1	0	9
OG0000516	1	0	1	1	1	1	1	1	1	0	1	1	1	0	1	0	8
OG0000494	0	1	1	1	1	1	1	1	0	0	1	0	1	0	1	0	7
OG0000955	0	1	0	1	1	1	1	1	1	0	1	1	1	0	1	0	7
OG0000607	1	0	1	1	1	1	1	1	1	1	1	1	0	0	1	0	9
OG0000773	1	0	0	1	0	1	1	1	1	1	1	1	1	0	1	0	7
OG0002022	0	0	0	1	0	0	0	1	1	1	1	0	0	0	0	0	4
OG0000561	1	0	1	1	1	1	1	1	1	1	1	1	1	0	0	0	9
OG0000193	1	1	1	1	1	1	1	1	1	0	1	1	1	1	1	1	9
OG0000655	1	1	1	1	1	1	1	0	1	1	1	1	0	0	1	0	9
OG0000807	1	1	0	1	0	1	1	1	1	0	1	1	1	0	1	0	7
OG0002028	0	0	0	0	1	1	1	1	1	0	0	0	0	0	0	0	5
OG0002029	0	0	0	0	1	1	1	1	1	0	0	0	0	0	0	0	5
OG0001500	0	0	1	0	1	0	1	1	1	1	1	1	0	0	1	0	6
OG0000849	1	0	1	1	1	1	1	1	1	1	1	1	0	0	0	0	9
OG0001084	1	0	0	1	1	1	0	1	1	1	1	1	1	0	0	0	7
OG0001587	1	0	0	1	1	0	1	0	1	1	1	1	0	0	0	0	6
OG0001900	0	1	1	1	0	0	0	1	0	1	0	1	0	0	0	0	5
OG0001030	1	0	0	1	0	1	1	1	1	0	1	1	1	0	1	0	6
OG0000815	1	0	1	1	1	1	1	1	1	0	1	1	0	0	1	0	8
OG0001919	0	0	1	1	0	0	1	1	1	0	1	0	0	0	0	0	5
OG0001984	1	0	0	1	1	0	1	1	0	0	0	0	0	0	0	0	5
OG0000444	1	0	1	1	1	1	1	1	1	1	1	1	0	0	0	0	9
OG0001708	0	0	0	1	0	1	1	1	1	0	1	1	0	0	1	0	5
OG0001290	1	1	0	0	1	0	1	1	1	1	0	0	0	0	0	0	7
OG0002287	1	0	0	0	0	1	0	0	0	0	0	0	0	0	0	0	2
OG0001849	1	0	0	1	1	1	1	0	0	0	0	1	0	0	0	0	5
OG0001140	1	0	1	0	1	1	1	1	1	1	0	1	0	0	0	0	8
OG0000911	1	1	0	1	0	1	1	1	1	1	1	1	0	0	1	0	8
OG0000937	1	0	0	1	1	1	1	1	1	1	1	1	0	0	1	0	8
OG0001054	1	0	0	1	0	1	1	1	0	0	1	1	0	0	1	0	5
OG0001506	0	0	1	1	0	1	1	1	0	0	1	1	0	0	1	0	5
OG0001600	1	1	0	1	0	1	1	1	1	0	1	0	0	0	0	0	7
OG0001748	1	0	1	0	1	1	1	1	1	0	0	0	0	0	0	0	7
OG0001871	1	0	0	0	1	1	1	1	1	0	0	0	0	0	0	0	6
OG0001261	0	0	1	1	0	1	1	1	1	0	1	1	1	0	1	0	6
OG0001215	0	1	0	1	1	0	1	1	0	1	0	1	1	0	1	0	6
OG0000702	0	1	0	1	1	1	1	1	1	1	1	1	0	0	1	0	8
OG0001117	1	0	0	1	0	1	1	1	1	1	1	1	1	0	0	0	7
OG0000974	0	1	1	1	1	0	0	1	0	1	0	1	1	1	1	1	6
OG0002782	0	0	0	0	0	1	0	0	0	0	0	0	0	0	0	0	1
OG0001633	1	0	0	0	1	0	0	1	1	0	1	1	1	0	1	0	4
OG0002095	0	0	0	0	1	0	0	1	1	0	1	0	0	0	0	0	3
OG0001987	1	0	1	0	0	0	1	1	0	0	1	0	0	0	0	0	4
OG0000189	1	1	1	1	1	1	1	1	1	1	1	1	1	0	1	0	10
OG0002833	0	0	0	0	0	0	1	0	0	0	0	0	0	0	0	0	1
OG0001304	1	0	0	1	0	1	0	1	1	0	1	1	1	0	1	0	5
OG0000512	1	1	1	1	1	1	1	1	1	0	1	1	0	0	1	0	9
OG0001248	0	1	1	0	1	1	1	1	1	0	1	1	0	0	1	0	7
OG0002291	0	1	0	0	0	0	0	0	1	0	0	0	0	0	0	0	2
OG0002864	0	0	0	0	0	0	0	0	1	0	0	0	0	0	0	0	1
OG0000300	1	1	1	1	1	1	1	1	1	1	1	0	1	0	1	0	10
OG0001556	1	1	0	1	0	1	1	1	1	0	1	0	0	0	0	0	7
OG0001630	1	1	1	1	0	1	1	1	0	0	0	1	0	0	0	0	7
OG0001024	1	1	1	0	0	0	1	1	1	1	1	1	0	0	1	0	7
OG0000751	1	0	0	1	0	1	1	1	1	1	1	1	1	0	1	0	7
OG0002017	0	0	0	1	0	0	0	1	1	1	1	0	0	0	0	0	4
OG0000728	0	0	1	0	1	1	1	1	1	1	1	1	1	0	1	0	7
OG0000410	1	1	0	1	1	1	1	1	1	1	1	1	0	1	1	0	9
OG0002754	0	0	0	0	1	0	0	0	0	0	0	0	0	0	0	0	1
OG0000050	1	1	1	1	1	1	1	1	1	1	1	1	1	0	1	0	10
OG0000257	1	0	1	1	1	1	1	1	1	1	1	1	1	0	1	0	9
OG0001499	0	0	1	1	1	1	1	0	0	0	1	1	1	0	1	0	5
OG0001295	1	1	0	0	0	1	0	1	1	0	0	1	1	0	1	0	5
OG0002036	0	0	0	0	0	1	0	1	1	0	0	1	1	0	0	0	3
OG0001011	1	0	0	1	0	1	1	1	1	1	1	1	1	0	0	0	7
OG0001027	1	0	1	1	0	1	0	1	1	0	1	1	1	0	1	0	6
OG0000877	1	1	0	1	0	1	0	1	1	1	1	1	1	0	1	0	7
OG0000591	1	1	1	1	0	0	1	1	1	1	1	1	1	0	1	0	8
OG0000792	1	1	1	1	0	0	1	1	0	0	1	1	1	1	1	0	6
OG0000636	1	1	0	1	0	1	1	1	1	1	1	1	0	0	1	0	8
OG0001279	0	0	0	1	0	1	1	1	1	0	1	1	1	0	1	0	5
OG0002031	0	0	0	0	0	1	1	1	1	0	1	0	0	0	0	0	4
OG0001391	1	1	0	1	1	1	1	1	1	0	1	0	0	0	0	0	8
OG0001109	1	1	0	1	0	1	1	1	1	0	1	1	0	0	1	0	7
OG0000586	1	1	0	1	0	1	1	1	1	1	1	1	0	0	1	0	8
OG0000262	1	0	0	1	1	1	1	1	1	1	1	1	1	1	1	1	8
OG0000278	1	1	1	1	1	1	1	1	1	1	1	1	1	0	1	0	10
OG0000439	1	1	0	1	1	1	1	1	0	1	1	1	1	0	1	0	8
OG0000687	1	1	0	1	1	1	1	1	1	0	1	1	1	0	1	0	8
OG0001129	1	0	1	0	1	0	1	1	1	1	1	1	0	0	1	0	7
OG0000585	1	0	1	1	1	1	1	1	1	1	1	1	0	0	1	0	9
OG0001651	0	1	0	1	1	0	0	0	0	0	1	1	1	1	1	0	3
OG0000535	1	0	1	0	0	1	1	1	1	1	1	1	1	0	1	0	7
OG0000272	1	1	1	1	1	1	1	1	1	1	1	1	1	0	1	0	10
OG0001036	1	0	1	0	0	1	1	1	1	0	1	1	1	0	1	0	6
OG0000570	1	0	0	0	1	1	1	1	1	1	1	1	0	0	1	0	7
OG0000426	1	1	1	1	1	1	1	1	1	1	1	1	0	0	1	0	10
OG0000969	0	1	1	1	1	1	1	1	1	0	1	1	1	0	0	0	8
OG0002859	0	0	0	0	0	0	0	0	1	0	0	0	0	0	0	0	1
OG0001225	0	1	1	1	0	1	1	1	1	1	1	1	0	0	0	0	8
OG0000392	1	1	1	1	1	1	1	1	1	1	1	1	0	0	0	0	10
OG0001642	0	1	1	0	0	0	1	1	1	1	0	1	0	0	0	0	6
OG0001202	0	1	1	1	1	0	1	1	0	1	1	1	0	0	1	0	7
OG0000784	1	0	1	0	0	1	1	1	1	0	1	1	0	1	1	1	6
OG0000357	1	1	0	1	0	1	0	1	1	1	1	1	0	0	1	0	7
OG0000110	1	1	0	1	1	1	1	1	0	0	1	1	1	0	1	0	7
OG0000363	1	1	0	1	1	1	1	1	0	0	1	1	1	0	1	0	7
OG0000567	1	1	0	0	0	1	1	1	1	1	1	1	1	0	1	0	7
OG0001235	0	1	0	0	1	1	1	1	1	0	1	1	1	0	1	0	6
OG0002847	0	0	0	0	0	0	0	1	0	0	0	0	0	0	0	0	1
OG0000320	1	1	1	1	1	1	1	1	1	0	1	1	1	0	1	0	9
OG0000323	1	1	1	1	1	1	1	1	1	0	1	1	1	0	1	0	9
OG0000322	1	1	1	1	1	1	1	1	1	0	1	1	1	0	1	0	9
OG0000422	1	1	1	1	0	1	1	1	1	1	1	1	0	0	0	0	9
OG0002006	0	1	0	0	1	1	1	0	1	0	0	0	0	0	0	0	5
OG0001878	1	0	0	0	1	1	1	1	1	0	0	0	0	0	0	0	6
OG0002093	0	0	0	0	1	1	1	0	0	1	0	0	0	0	0	0	4
OG0002146	1	0	0	0	0	1	1	0	0	0	0	0	0	0	0	0	3
OG0001082	1	1	1	0	1	1	1	1	1	0	1	0	0	0	1	0	8
OG0000598	1	0	0	1	1	1	1	1	1	1	1	1	1	0	1	0	8
OG0000511	1	0	0	0	1	1	1	1	1	1	1	1	1	0	0	0	7
OG0002854	0	0	0	0	0	0	0	0	1	0	0	0	0	0	0	0	1
OG0001053	1	0	0	0	1	1	1	1	1	0	1	1	1	0	1	0	6
OG0002827	0	0	0	0	0	0	1	0	0	0	0	0	0	0	0	0	1
OG0000373	1	1	1	1	0	1	1	1	1	1	1	1	1	0	1	0	9
OG0000908	1	1	1	1	0	1	1	1	1	0	1	1	1	0	0	0	8
OG0000433	1	1	0	1	0	1	1	1	1	0	1	1	1	0	1	0	7
OG0000992	0	0	1	1	1	1	1	1	1	1	1	0	1	0	1	0	8
OG0000462	1	0	0	0	0	1	1	1	1	0	1	1	1	0	1	0	5
OG0000939	1	0	0	1	1	1	1	1	1	0	1	1	0	0	1	0	7
OG0001463	0	1	0	0	0	0	1	1	1	1	0	1	1	1	1	0	5
OG0001626	1	0	0	1	0	1	1	1	1	0	0	1	0	0	1	0	6
OG0001931	0	0	0	1	0	1	0	0	0	0	0	1	1	0	1	0	2
OG0000385	1	0	1	1	1	1	1	1	1	1	1	1	1	0	1	0	9
OG0001273	0	0	0	1	1	1	1	1	1	0	1	1	1	0	1	0	6
OG0001376	1	0	1	1	0	1	0	1	1	1	1	0	1	0	0	0	7
OG0001377	1	0	1	1	0	1	0	1	1	1	1	0	1	0	0	0	7
OG0001298	1	0	1	0	1	1	1	1	1	1	1	0	0	0	0	0	8
OG0000254	1	0	1	1	1	1	1	1	1	1	1	1	0	1	1	1	9
OG0001216	0	1	0	1	1	1	1	1	1	0	1	1	1	0	0	0	7
OG0001539	1	0	1	1	0	1	0	1	1	0	0	0	0	0	1	0	6
OG0000485	0	1	0	0	1	1	1	1	1	1	1	1	1	1	1	1	7
OG0001934	0	0	0	1	1	0	0	0	1	0	0	1	1	0	1	0	3
OG0001307	1	0	1	1	0	0	1	1	0	0	1	1	0	0	1	0	5
OG0000805	1	1	1	1	1	1	1	1	1	1	1	0	0	0	0	0	10
OG0000897	1	0	1	1	1	1	1	1	1	1	1	0	1	0	0	0	9
OG0001669	0	1	1	0	0	1	1	1	1	1	1	0	0	0	0	0	7
OG0001678	0	1	1	1	1	0	1	0	1	1	1	0	0	0	0	0	7
OG0001983	1	1	0	0	1	0	1	0	0	1	0	0	0	0	0	0	5
OG0000023	1	1	0	1	1	1	1	1	1	1	1	1	1	0	1	0	9
OG0001702	0	0	0	1	0	1	1	1	1	0	1	0	0	0	1	0	5
OG0000523	1	0	1	1	0	1	1	1	1	1	1	1	1	0	1	0	8
OG0001141	1	1	0	0	1	1	1	0	1	1	1	1	0	0	1	0	7
OG0000405	1	1	1	0	1	1	1	1	1	1	1	1	1	0	1	0	9
OG0002674	1	0	0	0	0	0	0	0	0	0	0	0	0	0	0	0	1
OG0001310	1	1	1	1	1	1	1	1	1	0	0	0	0	0	0	0	9
OG0001818	0	1	1	0	1	0	0	1	1	1	1	0	0	0	0	0	6
OG0002158	0	0	1	0	0	0	0	1	1	0	0	0	0	0	0	0	3
OG0000264	1	1	1	1	1	1	1	1	1	1	1	1	1	0	1	0	10
OG0000575	1	0	0	1	1	1	1	1	1	0	1	1	0	1	1	1	7
OG0000230	1	1	0	1	1	1	1	1	1	1	1	1	0	1	1	1	9
OG0000151	1	1	1	1	0	1	1	1	1	1	1	1	1	1	1	1	9
OG0000228	1	1	0	1	1	1	1	1	1	0	1	1	1	1	1	1	8
OG0000150	1	1	1	1	0	1	1	1	1	1	1	1	1	1	1	1	9
OG0000145	1	1	0	1	1	1	1	1	1	1	1	1	1	1	1	1	9
OG0001037	1	0	0	0	0	1	1	1	1	0	1	1	0	1	1	1	5
OG0001031	1	0	0	0	1	1	1	0	1	1	0	1	1	1	1	0	6
OG0000234	1	1	0	1	1	1	1	1	1	1	1	1	0	1	1	1	9
OG0001203	0	1	0	0	1	0	1	1	0	0	1	1	1	1	1	1	4
OG0000382	1	1	0	1	0	1	1	1	1	1	1	1	0	1	1	1	8
OG0000199	0	1	1	1	1	0	1	1	1	1	1	1	1	1	1	1	8
OG0002142	1	0	0	0	0	1	1	0	0	0	0	0	0	0	0	0	3
OG0001167	1	0	0	1	1	1	1	1	1	1	1	1	0	0	0	0	8
OG0000384	1	1	0	1	0	1	1	1	1	1	1	1	0	1	1	1	8
OG0000152	1	1	1	1	0	1	1	1	1	1	1	1	1	1	1	1	9
OG0000148	1	1	0	1	1	1	1	1	1	1	1	1	1	1	1	1	9
OG0000956	0	1	0	0	1	0	1	1	0	1	1	1	1	1	1	1	5
OG0000229	1	1	0	1	1	1	1	1	1	0	1	1	1	1	1	1	8
OG0000146	1	1	0	1	1	1	1	1	1	1	1	1	1	1	1	1	9
OG0000503	0	0	1	1	1	0	1	1	1	1	1	1	1	1	1	1	7
OG0001341	1	1	0	1	1	0	1	0	1	1	1	1	0	0	0	0	7
OG0001619	1	0	0	1	0	1	1	1	1	1	1	0	0	0	0	0	7
OG0002074	0	0	1	1	0	1	0	0	1	0	0	0	0	0	0	0	4
OG0001249	0	1	1	0	1	1	1	1	1	0	1	1	1	0	0	0	7
OG0001786	0	1	0	1	1	1	1	0	0	0	1	1	0	0	0	0	5
OG0001565	1	0	0	1	1	1	1	1	1	0	1	0	0	0	0	0	7
OG0000756	1	0	1	0	0	1	1	1	1	0	1	1	1	0	1	0	6
OG0000953	0	1	0	1	1	1	1	0	1	0	1	1	0	1	1	1	6
OG0000397	1	1	0	1	0	1	1	1	1	0	1	1	0	1	1	1	7
OG0001739	1	0	0	1	0	1	1	1	1	0	1	0	0	0	0	0	6
OG0000976	0	1	1	0	1	0	1	1	1	1	1	1	1	0	0	0	7
OG0000967	0	1	0	1	0	1	1	1	1	1	1	1	0	0	1	0	7
OG0001579	1	0	0	1	1	1	1	1	1	0	1	0	0	0	0	0	7
OG0000295	1	1	1	1	1	1	1	1	1	1	0	1	0	0	1	0	10
OG0000951	1	1	0	1	1	1	1	1	1	0	1	1	1	0	0	0	8
OG0000876	1	1	0	1	1	1	1	1	1	0	1	1	1	0	0	0	8
OG0001294	1	0	0	0	1	1	0	1	1	0	1	1	1	0	1	0	5
OG0000746	1	0	0	0	1	1	0	1	1	0	1	1	1	0	1	0	5
OG0001008	1	0	0	0	1	1	1	1	1	0	1	1	1	0	1	0	6
OG0001238	0	1	0	0	0	0	1	1	1	1	1	1	1	1	1	0	5
OG0000673	1	1	0	0	0	1	1	1	1	1	1	1	1	1	1	0	7
OG0001026	1	1	1	0	0	1	1	1	1	1	1	0	0	0	0	0	8
OG0001189	1	1	1	1	1	1	1	1	0	1	0	0	0	0	0	0	9
OG0001942	0	0	0	0	0	1	0	1	1	0	0	1	1	0	1	0	3
OG0000787	1	1	0	1	0	1	1	1	1	0	0	1	0	0	0	0	7
OG0001041	1	1	0	1	0	1	1	0	1	0	0	1	0	0	0	0	6
OG0001123	1	1	0	1	1	1	1	1	1	1	1	0	0	0	0	0	9
OG0001081	1	0	0	1	1	1	1	1	1	1	1	1	0	0	0	0	8
OG0001854	1	0	0	1	0	1	1	1	0	0	1	0	0	0	0	0	5
OG0000051	0	1	1	1	1	0	1	1	1	0	1	1	1	0	1	0	7
OG0000628	1	1	0	1	1	1	1	1	1	0	1	1	0	0	0	0	8
OG0001360	1	0	0	1	1	1	1	1	1	1	1	0	0	0	0	0	8
OG0001534	1	0	0	1	1	1	1	1	0	0	1	0	0	0	0	0	6
OG0000076	1	1	1	1	1	1	1	1	1	1	1	1	0	0	1	0	10
OG0002750	0	0	0	0	1	0	0	0	0	0	0	0	0	0	0	0	1
OG0002307	0	0	0	1	0	0	0	0	1	0	0	0	0	0	0	0	2
OG0002101	0	0	0	0	0	1	0	1	1	1	0	0	0	0	0	0	4
OG0000823	1	1	0	1	0	1	1	1	1	1	0	1	1	0	1	0	8
OG0000013	1	1	0	1	1	1	1	1	1	1	1	1	1	0	1	0	9
OG0000121	1	0	1	1	0	1	1	1	1	1	1	1	0	0	1	0	8
OG0001075	1	1	1	1	0	1	0	1	1	1	1	1	0	0	0	0	8
OG0000431	1	1	1	1	1	1	0	1	1	0	1	1	0	0	1	0	8
OG0000345	1	1	0	1	0	1	0	1	1	0	1	0	0	0	1	0	6
OG0000926	1	1	1	1	0	1	1	1	1	0	1	1	0	0	0	0	8
OG0002025	0	0	0	1	0	0	0	1	1	0	0	1	0	0	1	0	3
OG0002818	0	0	0	0	0	0	1	0	0	0	0	0	0	0	0	0	1
OG0001969	1	0	1	0	0	1	0	1	1	0	0	0	0	0	0	0	5
OG0001971	1	0	1	0	0	1	0	1	1	0	0	0	0	0	0	0	5
OG0002717	0	0	1	0	0	0	0	0	0	0	0	0	0	0	0	0	1
OG0001654	0	1	0	0	0	1	1	1	1	0	1	1	0	0	1	0	5
OG0000312	1	1	0	1	1	1	1	1	1	1	1	1	0	0	1	0	9
OG0000526	1	0	0	1	1	1	1	1	1	1	1	1	1	0	1	0	8
OG0000605	1	0	1	1	1	1	1	1	1	1	1	1	0	0	1	0	9
OG0000657	1	1	1	0	1	1	1	1	1	0	1	1	1	0	1	0	8
OG0001267	0	0	1	0	1	1	1	1	0	0	1	1	0	0	1	0	5
OG0001537	1	0	0	0	0	1	1	1	1	0	1	1	0	0	1	0	5
OG0001685	0	0	1	1	0	0	1	1	1	1	1	0	0	0	0	0	6
OG0000386	1	1	1	1	0	1	0	1	1	0	0	1	1	0	0	0	7
OG0001780	1	0	0	1	0	1	1	1	1	0	1	0	0	0	0	0	6
OG0000365	1	1	1	1	1	1	1	1	1	0	1	1	1	0	0	0	9
OG0001252	0	0	1	0	0	1	1	1	1	1	1	1	1	0	1	0	6
OG0000048	1	1	0	1	1	1	1	1	1	1	1	1	1	0	1	0	9
OG0000071	1	1	1	1	0	1	1	1	1	1	0	0	1	0	0	0	9
OG0001457	0	1	0	1	0	1	1	1	0	1	1	1	0	0	1	0	6
OG0001816	0	1	0	1	1	0	0	1	1	1	1	0	0	0	0	0	6
OG0002032	0	0	0	0	0	1	1	1	1	0	1	0	0	0	0	0	4
OG0000414	1	0	1	1	1	1	1	1	1	1	1	1	1	0	0	0	9
OG0000691	1	1	0	1	1	1	1	1	1	0	1	1	1	0	1	0	8
OG0000337	1	1	1	1	1	1	1	1	1	0	1	0	0	0	1	0	9
OG0000796	1	1	0	1	1	1	1	1	1	1	1	0	0	0	1	0	9
OG0001815	0	1	1	0	0	0	0	1	0	1	1	1	0	0	1	0	4
OG0001559	1	1	0	1	0	1	1	1	0	0	0	1	0	0	1	0	6
OG0001168	1	0	0	0	1	1	1	1	1	0	1	1	1	0	1	0	6
OG0001327	1	1	1	0	1	1	1	1	1	1	0	0	0	0	0	0	9
OG0001296	1	0	0	1	0	1	1	1	1	1	1	1	0	0	0	0	7
OG0000988	0	0	1	1	1	1	1	0	1	1	1	1	0	1	0	1	7
OG0000694	0	1	0	1	1	1	1	0	0	1	1	1	1	1	1	1	6
OG0000287	1	1	0	1	1	1	1	1	1	1	1	1	1	0	1	0	9
OG0000841	1	1	0	1	1	1	1	1	1	0	1	1	0	0	1	0	8
OG0000163	1	0	1	1	1	1	1	1	1	1	1	1	1	1	1	1	9
OG0002745	0	0	0	0	1	0	0	0	0	0	0	0	0	0	0	0	1
OG0001039	1	1	0	1	0	1	1	1	1	0	1	1	1	0	0	0	7
OG0000541	1	0	1	1	0	1	1	1	1	1	1	1	1	0	1	0	8
OG0001265	0	0	1	1	1	1	1	1	1	0	1	1	0	0	1	0	7
OG0001198	0	1	0	1	1	1	1	1	0	0	1	1	1	0	0	0	6
OG0001074	1	1	1	1	0	1	1	1	1	1	1	0	0	0	0	0	9
OG0000979	0	1	1	0	1	0	0	1	0	1	1	1	1	0	1	0	5
OG0001072	1	1	0	1	1	1	0	1	0	0	1	1	1	0	1	0	6
OG0000180	1	0	1	1	0	1	1	1	1	1	1	1	1	0	1	0	8
OG0000812	1	0	0	1	1	1	1	1	1	1	1	1	0	0	1	0	8
OG0000021	1	1	0	1	1	1	1	1	1	1	1	1	1	1	1	0	9
OG0000529	1	0	0	1	1	1	1	1	1	0	0	1	0	0	1	0	7
OG0001624	1	0	0	1	1	1	1	1	1	0	1	0	0	0	0	0	7
OG0000603	1	0	0	1	1	1	1	1	1	1	1	1	1	0	1	0	8
OG0001830	0	0	0	1	1	1	1	1	1	0	1	0	0	0	0	0	6
OG0001860	1	0	1	0	0	1	0	1	1	0	0	0	0	0	0	0	5
OG0002789	0	0	0	0	0	1	0	0	0	0	0	0	0	0	0	0	1
OG0000840	1	0	1	1	0	1	0	1	1	0	1	1	1	1	1	0	6
OG0000183	1	1	1	1	1	1	1	1	1	0	1	1	1	1	1	1	9
OG0000918	1	0	0	1	1	1	0	1	1	0	1	1	0	1	1	1	6
OG0000705	0	1	0	1	1	1	1	1	1	1	0	1	0	0	1	0	8
OG0000904	1	1	1	0	1	1	1	1	1	1	1	1	0	0	0	0	9
OG0001574	1	0	1	1	0	1	0	1	1	1	1	0	0	0	0	0	7
OG0002063	1	0	1	0	0	0	0	1	0	0	0	0	1	0	0	0	3
OG0002164	0	0	0	1	0	1	0	0	0	0	0	0	0	0	1	0	2
OG0000531	1	0	1	1	0	1	1	1	1	0	0	1	1	1	1	1	7
OG0000253	1	0	0	1	1	1	1	1	1	0	1	1	1	0	1	0	7
OG0000568	1	0	0	1	0	1	1	1	1	1	1	1	1	1	1	0	7
OG0000810	1	0	0	0	0	1	1	1	1	1	1	1	1	1	1	0	6
OG0001233	0	1	0	0	1	1	1	1	0	0	1	1	1	0	1	0	5
OG0000238	1	1	1	1	0	1	0	1	1	1	1	1	1	1	1	1	8
OG0001462	0	1	0	1	0	0	0	1	1	1	1	1	0	1	0	1	5
OG0000155	1	1	1	1	1	1	1	1	1	1	1	1	0	1	1	1	10
OG0000286	1	1	0	1	1	1	1	1	1	1	1	1	1	1	1	0	9
OG0002058	1	0	0	0	0	1	0	1	1	0	0	0	0	0	0	0	4
OG0002155	0	1	0	0	0	0	0	0	0	1	1	0	0	0	0	0	2
OG0000366	1	1	1	1	1	1	0	1	1	1	1	0	0	0	0	0	9
OG0002167	0	0	0	0	1	0	1	0	0	1	0	0	0	0	0	0	3
OG0001845	1	0	0	0	0	1	1	1	1	1	0	0	0	0	0	0	6
OG0002042	0	0	0	0	0	0	0	1	1	0	1	0	0	0	1	0	2
OG0000532	1	1	0	1	0	1	1	1	1	1	1	1	1	0	1	0	8
OG0000279	1	1	1	1	1	1	1	1	1	1	1	1	1	0	1	0	10
OG0001362	1	1	0	0	1	1	1	1	1	0	1	0	0	0	1	0	7
OG0001692	0	0	1	0	0	1	0	1	1	1	1	1	0	0	0	0	5
OG0000167	1	1	1	1	0	1	1	1	1	1	1	1	0	0	1	0	9
OG0000362	1	1	1	0	1	1	1	0	1	0	1	0	0	1	1	0	7
OG0000819	1	0	1	1	1	0	1	1	0	1	1	1	1	0	1	0	7
OG0000996	0	0	1	1	1	1	1	1	1	0	1	1	1	0	1	0	7
OG0000661	1	1	1	0	0	1	1	1	1	1	1	1	1	0	1	0	8
OG0001894	1	1	0	0	0	1	1	0	0	0	1	0	1	0	0	0	4
OG0000602	1	0	0	1	1	1	1	1	1	1	1	1	1	0	1	0	8
OG0001471	0	1	0	0	0	1	1	1	1	0	1	1	1	0	1	0	5
OG0000855	1	0	1	1	1	0	1	1	1	1	1	1	0	0	1	0	8
OG0001698	0	0	0	1	1	0	1	0	1	1	0	1	1	0	1	0	5
OG0000718	0	1	0	0	0	0	1	1	1	1	1	1	1	1	1	1	5
OG0000475	1	1	0	1	0	1	1	1	1	0	1	1	1	1	1	1	7
OG0000791	1	1	1	0	0	1	1	1	1	1	1	1	0	0	1	0	8
OG0001637	0	1	1	0	0	1	1	1	1	1	1	0	0	0	0	0	7
OG0000203	0	1	1	1	1	1	1	1	1	0	1	1	1	1	1	1	8
OG0000679	1	1	1	0	0	1	1	1	1	1	1	1	1	0	1	0	8
OG0001217	0	1	0	1	0	1	1	1	0	1	1	1	1	0	1	0	6
OG0000428	1	1	0	1	1	1	1	1	1	1	1	1	1	0	1	0	9
OG0000640	1	1	0	1	1	1	1	1	1	1	1	1	0	0	1	0	9
OG0000396	1	1	0	1	1	1	1	1	1	0	1	1	0	1	1	1	8
OG0001943	0	0	0	0	0	0	1	1	1	0	0	1	1	0	1	0	3
OG0000727	0	0	1	0	0	1	1	1	1	1	1	1	1	1	1	1	6
OG0001314	1	0	0	0	1	0	1	1	1	1	1	1	0	0	1	0	6
OG0000732	0	0	1	0	1	1	1	1	0	1	1	1	0	1	1	1	6
OG0001157	1	1	0	1	1	0	1	0	1	0	1	1	1	0	1	0	6
OG0001194	1	1	0	1	1	1	1	1	1	0	1	1	0	0	0	0	8
OG0000670	1	1	0	1	1	1	1	1	1	1	1	1	0	0	0	0	9
OG0002156	0	1	0	1	1	0	0	0	0	0	0	0	0	0	0	0	3
OG0000506	0	0	1	1	0	1	1	1	1	1	1	1	1	1	1	1	7
OG0001532	1	0	1	1	0	1	1	1	1	1	0	0	0	0	0	0	8
OG0002053	1	0	0	0	0	1	0	1	1	0	0	0	0	0	0	0	4
OG0000015	1	1	0	1	1	1	1	1	1	1	1	1	1	0	1	0	9
OG0001019	1	0	0	1	1	1	0	1	1	0	0	1	0	0	1	0	6
OG0001851	1	0	0	1	1	1	0	1	0	0	0	0	0	0	0	0	5
OG0002163	0	0	0	1	0	1	0	0	1	0	0	0	0	0	0	0	3
OG0001928	0	0	0	1	0	1	1	0	0	1	0	0	1	0	0	0	4
OG0000445	1	0	0	0	0	1	1	1	1	1	1	1	1	1	1	1	6
OG0000108	1	0	1	1	1	1	1	1	1	0	1	1	1	0	1	0	8
OG0001939	0	0	0	0	1	1	1	1	0	1	1	0	0	0	0	0	5
OG0000866	1	0	1	1	1	1	0	1	1	1	1	1	0	0	1	0	8
OG0000644	1	1	0	1	1	1	1	1	1	1	0	1	0	0	1	0	9
OG0000867	1	0	1	1	1	1	0	1	1	1	1	1	0	0	1	0	8
OG0001192	1	1	0	0	0	1	1	1	1	1	1	1	1	0	0	0	7
OG0000625	1	1	0	1	1	1	1	1	1	0	1	1	1	0	1	0	8
OG0001850	1	0	0	0	1	1	1	1	0	0	1	0	0	0	0	0	5
OG0000874	1	1	0	1	1	1	1	1	1	0	1	1	0	0	1	0	8
OG0000553	1	1	0	1	1	1	1	1	0	0	0	1	0	0	1	0	7
OG0001658	0	1	0	0	0	1	1	1	1	1	1	1	0	0	0	0	6
OG0000611	1	0	0	0	1	1	1	1	1	1	1	1	0	0	1	0	7
OG0002096	0	0	0	0	0	1	0	0	0	0	0	1	0	0	1	0	1
OG0001193	1	1	0	1	0	1	1	1	1	0	1	0	1	0	1	0	7
OG0000030	1	1	1	1	1	1	1	1	1	1	0	1	0	0	1	0	10
OG0000379	1	1	0	1	1	1	1	1	1	1	1	1	1	0	1	0	9
OG0001734	1	0	0	0	0	1	1	1	1	0	0	1	0	0	1	0	5
OG0000626	1	1	1	1	1	1	1	1	1	0	1	1	0	0	1	0	9
OG0001358	1	0	0	1	0	1	1	1	1	0	1	1	0	0	1	0	6
OG0001509	0	0	0	1	1	0	0	1	1	1	1	1	1	0	1	0	5
OG0001116	1	0	0	1	0	1	1	1	1	1	1	1	0	0	1	0	7
OG0000826	1	0	0	1	0	1	1	1	1	1	1	1	1	0	1	0	7
OG0000825	1	1	0	1	0	1	1	1	1	0	0	1	0	0	1	0	7
OG0001356	1	1	0	1	0	1	0	1	1	0	0	1	1	0	1	0	6
OG0000352	1	1	0	1	1	1	1	1	1	1	1	1	1	0	1	0	9
OG0000117	1	1	0	1	1	1	1	1	1	0	1	1	1	0	1	0	8
OG0000077	1	0	1	1	1	0	1	1	1	1	1	1	0	0	0	0	8
OG0000646	1	0	1	1	1	1	0	1	1	1	1	1	1	0	1	0	8
OG0001061	1	1	1	1	1	1	1	1	1	1	0	0	0	0	0	0	10
OG0002020	0	0	0	1	1	1	1	0	0	0	1	0	0	0	0	0	4
OG0002098	0	0	0	0	0	1	1	1	1	0	0	0	0	0	0	0	4
OG0001493	0	1	0	1	1	1	1	1	1	0	1	1	0	0	0	0	7
OG0000205	1	1	0	1	1	1	1	1	1	1	1	1	1	0	1	0	9
OG0000281	1	1	1	1	1	1	1	0	1	1	1	1	1	0	1	0	9
OG0001095	1	1	1	1	1	1	1	1	1	0	0	0	0	0	0	0	9
OG0001806	0	1	1	1	0	1	0	1	1	0	1	0	0	0	0	0	6
OG0001466	0	1	0	0	1	1	1	1	1	0	0	1	0	0	1	0	6
OG0000277	1	0	1	1	1	1	0	1	1	1	1	1	1	0	1	0	8
OG0001477	0	1	1	1	0	1	0	1	1	0	1	1	0	0	1	0	6
OG0002817	0	0	0	0	0	0	1	0	0	0	0	0	0	0	0	0	1
OG0000883	1	1	1	1	1	1	1	1	1	1	1	0	0	0	0	0	10
OG0001246	0	1	0	1	1	0	1	0	1	1	1	1	1	0	1	0	6
OG0001111	1	0	0	0	1	1	1	1	1	0	1	1	0	0	1	0	6
OG0001444	1	1	0	0	0	0	1	1	1	1	1	1	0	0	1	0	6
OG0001810	0	1	0	0	0	1	1	1	1	0	1	0	0	0	1	0	5
OG0000104	1	0	1	1	0	1	1	1	1	1	1	1	1	0	1	0	8
OG0001370	1	1	0	1	1	1	0	1	1	0	1	1	0	0	0	0	7
OG0001821	0	1	0	0	1	0	0	0	0	1	1	1	0	0	1	0	3
OG0001629	1	1	1	1	0	1	1	1	0	1	0	0	0	0	0	0	8
OG0000729	0	0	1	1	0	1	1	1	1	0	1	1	1	0	1	0	6
OG0001666	0	1	0	1	0	1	0	0	1	0	1	1	1	0	1	0	4
OG0000449	1	1	1	1	1	1	1	0	1	1	1	1	1	0	1	0	9
OG0000793	1	0	1	1	1	1	1	1	1	1	1	1	0	0	0	0	9
OG0001813	0	1	0	1	1	0	1	1	0	1	0	0	0	0	0	0	6
OG0001232	0	1	0	1	1	0	1	1	1	0	1	1	1	0	1	0	6
OG0001805	0	1	0	0	0	1	1	1	1	1	1	0	0	0	0	0	6
OG0001521	0	0	0	0	1	1	1	0	1	1	0	1	1	0	1	0	5
OG0000469	1	0	0	1	1	1	1	1	1	0	1	1	0	0	0	0	7
OG0002076	0	0	1	0	0	0	1	1	0	0	1	0	0	0	0	0	3
OG0002069	0	1	0	0	1	0	0	0	1	0	1	0	0	0	0	0	3
OG0001469	0	1	0	1	0	1	1	1	0	0	1	1	1	0	1	0	5
OG0000416	1	0	1	1	1	0	1	1	1	1	1	1	1	0	1	0	8
OG0002027	0	0	0	0	1	0	1	1	1	0	1	0	0	0	0	0	4
OG0000674	1	1	1	1	0	1	1	1	1	1	1	1	1	0	0	0	9
OG0001582	1	0	0	1	0	1	1	1	1	0	1	1	0	0	0	0	6
OG0001852	1	0	0	1	1	1	1	0	0	0	1	0	0	0	0	0	5
OG0000350	1	1	1	1	1	1	1	1	1	1	1	1	1	0	0	0	10
OG0000418	1	0	1	0	1	1	1	1	1	1	1	1	1	0	0	0	8
OG0001369	1	0	1	1	0	1	0	1	1	0	1	1	1	0	0	0	6
OG0001269	0	0	0	1	1	1	1	1	0	0	1	1	1	0	1	0	5
OG0000558	1	0	1	0	1	1	1	1	1	1	1	1	0	1	1	0	8
OG0000412	1	0	1	1	1	1	1	1	1	1	1	1	1	0	1	0	9
OG0000557	1	1	1	1	1	0	1	1	1	1	1	0	0	0	0	0	9
OG0001381	1	0	0	1	1	1	1	1	1	1	0	1	0	0	0	0	8
OG0000562	1	0	1	1	1	1	1	1	1	1	1	1	0	0	1	0	9
OG0001914	0	1	1	0	0	0	1	1	1	0	1	0	0	0	0	0	5
OG0002034	0	0	0	0	0	1	1	1	1	1	0	0	0	0	0	0	5
OG0002001	0	1	0	0	0	1	0	1	1	1	0	0	0	0	0	0	5
OG0000851	1	0	1	1	1	1	1	1	1	0	1	1	1	0	0	0	8
OG0001100	1	0	0	1	1	1	1	1	1	1	1	1	0	0	0	0	8
OG0001419	1	0	0	1	1	1	1	1	1	1	1	0	0	0	0	0	8
OG0002054	1	0	0	1	0	1	1	0	0	0	0	0	0	0	0	0	4
OG0002315	0	0	0	0	0	1	0	1	0	0	0	0	0	0	0	0	2
OG0002841	0	0	0	0	0	0	0	1	0	0	0	0	0	0	0	0	1
OG0000326	1	1	0	0	1	1	1	1	1	1	1	1	0	0	0	0	8
OG0001525	0	0	0	0	1	1	0	1	1	1	1	1	1	0	0	0	5
OG0001778	1	0	1	0	1	1	1	1	0	0	1	0	0	0	0	0	6
OG0001505	0	0	1	1	1	1	1	1	1	1	1	0	0	0	0	0	8
OG0002075	0	0	1	1	0	1	0	0	1	0	0	0	0	0	0	0	4
OG0002694	0	1	0	0	0	0	0	0	0	0	0	0	0	0	0	0	1
OG0001221	0	1	0	1	0	0	1	1	1	1	0	1	0	0	1	0	6
OG0001349	1	0	1	1	1	1	0	1	1	0	1	0	0	0	0	0	7
OG0000755	1	0	1	1	1	1	1	1	1	1	1	1	0	0	0	0	9
OG0000380	1	1	0	1	1	1	1	1	1	1	1	1	1	0	1	0	9
OG0002696	0	1	0	0	0	0	0	0	0	0	0	0	0	0	0	0	1
OG0001616	1	1	1	1	0	1	0	0	0	0	0	1	0	0	0	0	5
OG0000909	1	1	1	1	0	1	1	1	1	0	1	1	0	0	1	0	8
OG0001694	0	0	0	1	0	1	1	1	1	0	1	1	0	0	1	0	5
OG0000881	1	1	0	1	1	1	0	1	0	1	1	1	1	0	1	0	7
OG0001485	0	1	0	1	1	0	1	1	0	1	0	1	0	0	1	0	6
OG0001974	1	0	1	0	0	1	0	1	1	0	0	0	0	0	0	0	5
OG0001976	1	1	0	0	0	1	0	1	1	0	0	0	0	0	0	0	5
OG0001681	0	1	1	1	0	1	0	1	0	0	1	1	1	0	0	0	5
OG0002318	0	0	0	0	0	1	0	0	1	0	0	0	0	0	0	0	2
OG0001119	1	1	1	1	1	1	1	1	1	0	1	0	0	0	0	0	9
OG0002803	0	0	0	0	0	1	0	0	0	0	0	0	0	0	0	0	1
OG0002746	0	0	0	0	1	0	0	0	0	0	0	0	0	0	0	0	1
OG0000589	1	1	0	1	1	1	1	1	1	1	0	1	1	0	0	0	9
OG0000202	0	1	1	0	0	1	1	1	1	0	1	1	1	0	0	0	6
OG0000794	1	1	0	1	1	1	1	1	1	0	1	1	0	0	0	0	8
OG0001771	1	0	0	1	1	1	0	1	0	1	0	1	0	0	0	0	6
OG0000123	1	1	0	1	1	1	1	1	1	0	1	1	1	0	1	0	8
OG0001107	1	0	0	1	1	1	1	1	1	1	1	1	0	0	0	0	8
OG0000270	1	0	0	1	1	1	1	1	1	1	1	1	1	1	1	1	8
OG0000470	1	0	0	1	1	1	1	1	1	0	1	0	1	0	0	0	7
OG0001960	1	0	1	0	0	0	1	1	0	0	1	0	0	0	0	0	4
OG0001826	0	0	1	1	0	1	1	1	1	0	1	0	0	0	0	0	6
OG0000154	1	1	1	0	1	1	1	1	1	0	1	1	1	0	1	0	8
OG0002002	0	1	0	0	0	1	0	1	1	1	0	0	0	0	0	0	5
OG0000613	1	1	1	1	1	1	1	1	1	0	1	1	1	0	0	0	9
OG0001965	1	0	1	0	0	1	0	1	1	0	0	0	0	0	0	0	5
OG0002150	0	1	0	0	0	0	0	0	0	0	0	1	0	0	1	0	1
OG0001645	0	1	1	1	0	1	1	0	0	1	0	1	1	0	0	0	6
OG0001437	1	0	0	1	1	1	1	1	1	0	1	1	0	0	0	0	7
OG0000948	1	0	0	1	1	1	1	1	1	0	1	1	1	0	1	0	7
OG0001409	1	0	1	0	1	0	1	0	1	0	1	1	1	0	1	0	5
OG0000395	1	0	0	1	1	1	1	1	1	1	0	1	1	0	1	0	8
OG0000489	0	1	0	1	1	0	1	1	1	1	1	1	1	1	1	1	7
OG0001744	1	0	1	0	0	1	1	1	1	0	1	0	0	0	0	0	6
OG0000927	1	1	1	1	1	0	0	0	1	1	1	1	1	0	1	0	7
OG0000225	1	1	1	1	1	1	1	1	1	1	1	1	1	0	1	0	10
OG0000680	1	1	1	0	0	1	1	1	1	1	1	1	1	0	1	0	8
OG0000831	1	1	0	1	1	1	1	1	1	0	1	1	0	0	1	0	8
OG0000374	1	0	1	1	1	0	1	1	1	1	1	1	1	0	0	0	8
OG0001247	0	1	1	0	0	1	1	1	1	1	0	1	1	0	1	0	7
OG0000473	1	1	1	1	0	1	1	1	1	1	1	1	1	0	1	0	9
OG0000860	1	1	0	1	1	1	1	1	1	1	0	1	0	0	1	0	9
OG0000965	0	1	1	1	1	0	1	1	1	0	1	1	1	0	1	0	7
OG0000447	1	1	1	1	1	1	1	1	1	0	1	1	1	0	1	0	9
OG0002712	0	0	1	0	0	0	0	0	0	0	0	0	0	0	0	0	1
OG0001591	1	0	0	0	1	0	1	1	1	0	0	1	1	0	1	0	5
OG0000590	1	1	1	1	0	0	1	1	1	1	1	1	1	0	1	0	8
OG0000505	0	0	1	1	1	1	1	1	1	0	1	1	1	1	1	1	7
OG0001414	1	0	1	1	0	1	1	1	1	1	1	0	0	0	0	0	8
OG0000018	1	1	0	1	1	1	1	1	1	1	1	0	1	0	1	0	9
OG0000314	1	1	1	1	1	1	1	1	1	0	1	1	0	0	0	0	9
OG0001160	1	0	1	1	1	1	1	1	1	0	0	1	0	0	0	0	8
OG0000652	1	1	0	1	0	1	1	1	1	1	1	0	0	0	0	0	8
OG0001311	1	1	1	1	1	1	1	1	1	0	0	0	0	0	0	0	9
OG0000822	1	0	1	1	1	1	0	1	1	0	1	1	1	0	0	0	7
OG0001429	1	0	1	1	0	1	0	1	1	1	0	1	0	0	1	0	7
OG0001171	1	1	0	1	0	1	1	1	1	0	1	1	0	0	1	0	7
OG0001621	1	0	0	1	0	1	1	1	1	1	1	0	0	0	0	0	7
OG0001799	0	1	0	1	1	0	1	1	1	1	0	0	0	0	0	0	7
OG0000964	0	1	0	0	1	1	1	1	1	1	1	1	1	0	1	0	7
OG0001017	1	0	0	1	1	1	1	1	1	0	1	0	0	0	1	0	7
OG0000195	1	0	0	1	1	1	1	1	1	1	0	0	0	0	1	0	8
OG0001009	1	0	0	0	1	1	1	1	1	0	1	1	1	0	1	0	6
OG0000935	1	1	1	0	1	1	1	1	1	0	1	1	0	0	1	0	8
OG0001495	0	1	1	0	0	0	1	1	1	0	1	1	1	0	1	0	5
OG0001303	1	1	0	0	1	1	1	1	1	0	1	1	0	0	0	0	7
OG0002061	1	0	0	1	1	1	0	0	0	0	0	0	0	0	0	0	4
OG0000739	1	1	0	1	0	1	0	1	1	0	1	1	1	1	1	0	6
OG0001776	1	0	0	1	1	1	1	1	0	0	0	1	0	0	0	0	6
OG0000634	1	1	0	1	0	1	1	1	1	1	1	1	1	0	1	0	8
OG0000502	0	0	1	1	1	0	1	1	1	1	1	1	1	0	0	0	7
OG0000554	1	1	0	1	0	1	1	1	0	0	0	1	1	0	1	0	6
OG0002300	0	0	1	0	0	0	1	0	0	0	0	0	0	0	0	0	2
OG0001970	1	0	1	0	0	1	0	1	1	0	0	0	0	0	0	0	5
OG0000002	0	0	0	0	0	0	0	0	0	0	0	1	1	0	1	0	0
OG0000004	1	1	1	1	1	1	1	1	1	1	1	1	1	0	0	0	10
OG0000011	1	0	0	0	0	1	1	1	1	0	1	1	1	0	1	0	5
OG0000017	1	1	1	1	1	1	1	1	1	1	1	1	1	1	1	1	10
OG0000024	0	0	0	0	0	1	0	0	0	0	0	1	1	0	1	0	1
OG0000034	1	0	1	1	1	0	1	1	1	0	1	1	1	0	1	0	7
OG0000035	1	1	1	1	1	1	1	1	1	1	1	1	1	0	0	0	10
OG0000038	1	0	1	1	1	1	1	1	1	1	1	1	1	0	1	0	9
OG0000047	1	1	1	1	1	1	1	1	1	1	0	0	0	0	0	0	10
OG0000053	1	1	1	1	1	1	1	1	1	1	0	1	1	0	1	0	10
OG0000055	1	1	1	1	1	1	1	1	1	0	1	1	1	1	1	0	9
OG0000059	1	1	1	1	1	1	1	1	1	1	0	0	0	0	0	0	10
OG0000064	1	1	1	1	1	1	1	1	1	1	1	0	0	0	0	0	10
OG0000066	1	1	0	1	0	1	1	1	1	1	1	1	1	0	1	0	8
OG0000068	0	1	0	1	1	1	1	1	1	0	1	1	1	0	1	0	7
OG0000069	0	0	0	0	0	0	0	0	0	0	0	1	1	0	1	0	0
OG0000074	1	0	0	1	0	1	1	1	1	0	1	1	1	0	1	0	6
OG0000078	1	1	1	1	1	1	1	1	1	1	0	0	0	0	0	0	10
OG0000079	1	1	1	1	1	1	1	1	1	1	1	1	1	0	1	0	10
OG0000086	1	1	1	1	0	1	1	1	1	1	1	1	1	0	1	0	9
OG0000089	1	1	1	1	1	1	1	1	1	1	1	0	0	0	1	0	10
OG0000090	1	1	1	1	1	1	1	1	1	1	0	0	0	0	0	0	10
OG0000096	1	1	1	1	1	1	1	1	1	0	1	1	1	1	1	1	9
OG0000097	1	1	1	1	1	1	1	1	1	1	1	1	1	0	1	0	10
OG0000098	1	1	0	1	0	1	1	1	1	0	1	1	1	0	1	0	7
OG0000115	1	1	1	1	1	1	1	1	1	1	1	1	1	0	1	0	10
OG0000124	0	1	0	1	1	0	1	1	1	0	1	1	1	0	1	0	6
OG0000128	0	0	0	0	0	0	0	0	0	0	0	0	1	0	1	0	0
OG0000129	0	0	0	0	0	0	0	0	0	0	0	0	0	0	1	0	0
OG0000134	1	1	1	1	1	1	1	1	1	1	1	1	1	0	1	0	10
OG0000135	1	1	1	1	1	1	1	1	1	1	1	1	1	0	1	0	10
OG0000137	1	0	1	1	1	1	1	1	1	1	1	1	0	1	1	0	9
OG0000156	1	1	1	1	1	1	1	1	1	0	1	0	0	0	0	0	9
OG0000164	1	0	1	1	1	1	1	1	1	1	1	1	0	0	1	0	9
OG0000184	1	1	1	1	0	1	1	1	1	0	1	1	1	1	1	1	8
OG0000187	1	0	0	1	0	1	1	1	1	0	1	1	1	0	1	0	6
OG0000188	1	1	0	1	1	0	1	1	1	1	1	1	1	0	0	0	8
OG0000204	0	0	0	0	0	0	0	0	0	0	0	1	0	0	1	0	0
OG0000207	1	1	1	1	1	1	1	1	1	0	1	1	1	0	1	0	9
OG0000210	1	1	0	1	1	1	1	1	1	1	1	1	0	0	0	0	9
OG0000222	1	1	0	1	0	1	1	1	1	0	1	1	1	0	1	0	7
OG0000227	1	1	0	1	1	1	1	1	1	1	1	1	0	0	1	0	9
OG0000240	1	1	1	1	1	1	1	1	1	1	1	1	1	0	1	0	10
OG0000252	1	1	1	1	1	0	1	1	1	0	1	1	1	0	1	0	8
OG0000263	1	1	0	1	1	1	1	1	1	1	1	1	1	1	1	0	9
OG0000266	1	1	1	1	1	1	1	1	1	1	1	1	1	0	1	0	10
OG0000267	1	0	1	1	1	1	1	1	1	1	0	1	1	0	1	0	9
OG0000291	1	0	0	0	1	1	1	1	1	0	1	1	1	1	1	1	6
OG0000292	1	0	0	1	1	1	1	1	1	0	1	0	0	0	1	0	7
OG0000293	1	0	0	1	1	1	1	1	1	1	1	1	1	1	1	1	8
OG0000294	1	0	0	1	1	1	1	1	1	1	1	1	1	0	1	0	8
OG0000296	1	1	0	1	1	1	1	1	1	1	1	0	1	0	1	0	9
OG0000297	1	1	1	1	0	1	1	1	1	1	1	1	1	0	0	0	9
OG0000311	0	0	0	0	0	0	0	0	0	0	0	1	1	0	0	0	0
OG0000329	1	1	0	1	1	1	1	1	1	0	1	0	0	0	0	0	8
OG0000334	1	0	1	1	1	1	1	1	1	1	1	1	1	0	0	0	9
OG0000335	1	0	1	1	0	1	1	1	1	1	1	1	1	0	1	0	8
OG0000343	1	0	1	1	1	1	1	1	0	1	1	1	0	0	0	0	8
OG0000344	1	1	0	1	1	1	1	1	1	1	1	1	1	0	1	0	9
OG0000354	1	1	1	1	1	1	1	1	0	1	0	0	0	0	0	0	9
OG0000355	1	0	1	1	1	0	1	1	1	1	1	0	0	0	0	0	8
OG0000364	1	1	1	1	0	1	1	1	1	1	1	0	0	0	0	0	9
OG0000369	1	1	1	1	1	1	1	1	1	1	1	1	0	0	1	0	10
OG0000375	1	0	1	1	1	1	1	1	1	1	1	0	0	0	0	0	9
OG0000393	1	1	0	1	1	1	1	1	1	1	1	0	0	0	0	0	9
OG0000399	1	1	1	1	0	1	1	1	1	1	1	1	1	0	1	0	9
OG0000400	1	0	1	1	0	1	1	1	1	1	1	1	1	0	0	0	8
OG0000409	1	0	1	1	0	1	1	1	0	0	1	1	1	0	0	0	6
OG0000415	1	0	1	1	0	1	1	1	1	1	1	1	1	0	1	0	8
OG0000419	1	1	1	1	1	1	1	1	1	0	1	1	1	0	1	0	9
OG0000424	1	1	1	1	1	1	1	1	1	1	1	0	1	0	0	0	10
OG0000430	1	1	0	1	1	1	1	1	1	1	1	1	1	0	1	0	9
OG0000452	1	1	1	1	1	1	1	1	1	0	1	1	1	0	1	0	9
OG0000456	1	1	1	1	1	1	1	1	1	1	1	0	0	0	0	0	10
OG0000458	1	0	0	1	1	1	1	0	1	1	1	1	1	0	1	0	7
OG0000478	1	0	1	1	1	1	1	1	1	0	1	0	0	0	0	0	8
OG0000483	1	1	0	1	1	1	1	1	1	0	1	1	0	1	1	1	8
OG0000487	0	1	0	1	1	1	1	1	1	0	1	1	1	1	1	1	7
OG0000492	0	1	1	1	1	0	1	0	1	0	1	1	1	0	1	0	6
OG0000499	0	1	1	1	1	1	1	1	1	1	1	1	0	0	1	0	9
OG0000504	0	0	1	1	1	1	1	1	0	1	1	1	1	0	1	0	7
OG0000509	0	0	0	0	0	0	0	0	0	0	0	1	0	0	1	0	0
OG0000514	1	0	0	1	1	1	1	0	1	0	0	1	0	0	1	0	6
OG0000515	1	1	1	1	1	1	1	1	1	1	1	1	0	0	0	0	10
OG0000521	1	0	1	1	0	1	1	1	1	1	1	1	1	0	1	0	8
OG0000533	1	1	1	1	1	1	1	1	0	0	1	1	1	0	1	0	8
OG0000534	1	0	1	0	1	1	1	1	1	0	1	1	1	0	1	0	7
OG0000542	1	0	1	1	0	1	1	1	1	1	1	1	0	0	1	0	8
OG0000544	1	1	0	1	1	1	1	1	1	1	1	1	0	0	1	0	9
OG0000549	1	1	1	1	1	1	0	1	1	1	1	0	0	0	0	0	9
OG0000563	1	1	0	1	0	1	0	1	1	0	1	1	0	0	1	0	6
OG0000566	1	1	1	1	1	1	1	1	1	1	1	0	0	0	1	0	10
OG0000569	1	0	0	1	1	1	1	1	1	1	1	1	1	0	1	0	8
OG0000581	1	0	1	0	1	1	1	1	1	0	1	1	0	0	1	0	7
OG0000584	1	1	1	1	1	1	0	1	1	1	0	0	0	0	0	0	9
OG0000608	1	0	1	1	1	1	1	1	1	1	1	1	0	0	1	0	9
OG0000612	1	1	0	1	1	1	1	1	1	0	1	1	1	0	1	0	8
OG0000617	1	0	0	0	1	0	1	1	1	0	0	1	1	0	1	0	5
OG0000618	1	1	0	1	1	1	1	1	1	0	1	1	0	0	0	0	8
OG0000619	1	1	0	1	1	1	1	1	1	0	1	1	0	0	0	0	8
OG0000623	1	0	0	1	1	1	1	1	1	1	1	1	1	0	1	0	8
OG0000624	1	0	0	1	1	1	1	1	1	1	1	1	0	0	1	0	8
OG0000632	1	0	1	1	0	1	0	1	1	1	1	1	1	0	1	0	7
OG0000637	1	1	0	1	1	1	1	1	1	1	1	1	1	0	0	0	9
OG0000638	1	1	0	1	1	1	1	1	1	1	1	1	0	0	1	0	9
OG0000641	1	1	0	1	1	1	1	1	1	1	1	1	0	0	1	0	9
OG0000648	1	1	1	1	1	1	1	1	1	1	1	1	0	0	0	0	10
OG0000650	1	1	1	1	1	1	0	1	1	0	1	1	1	0	1	0	8
OG0000654	1	1	1	1	1	1	1	1	1	0	1	0	0	0	0	0	9
OG0000668	1	1	1	1	1	1	1	1	1	1	1	0	0	0	0	0	10
OG0000678	1	1	1	1	1	1	1	1	0	1	0	0	1	0	0	0	9
OG0000690	1	1	1	1	1	1	1	1	1	1	1	0	0	0	0	0	10
OG0000692	1	1	0	1	1	1	1	1	1	0	1	1	1	0	1	0	8
OG0000695	0	1	1	1	1	1	1	1	1	1	1	1	0	0	1	0	9
OG0000697	0	1	0	1	1	1	1	1	1	1	0	1	1	0	0	0	8
OG0000701	0	1	1	1	1	1	1	1	1	0	1	1	1	0	0	0	8
OG0000709	0	1	0	1	0	1	1	1	1	1	0	1	0	0	1	0	7
OG0000712	0	1	1	1	1	0	1	1	1	1	1	1	0	0	0	0	8
OG0000730	0	0	1	1	1	1	1	1	1	0	1	1	1	0	1	0	7
OG0000740	1	0	1	1	0	1	1	1	1	0	1	1	0	0	1	0	7
OG0000745	1	0	1	1	1	1	1	1	1	0	1	1	0	0	0	0	8
OG0000750	1	0	0	1	0	1	1	1	1	1	1	1	1	0	1	0	7
OG0000753	1	1	1	1	0	1	1	1	1	1	1	1	0	0	0	0	9
OG0000757	1	1	1	1	1	1	1	1	1	1	1	0	0	0	0	0	10
OG0000759	1	0	0	1	1	1	1	1	1	0	0	0	0	0	0	0	7
OG0000764	1	0	0	1	1	1	1	1	1	1	1	1	0	0	1	0	8
OG0000768	1	1	1	1	1	1	1	1	0	0	1	0	1	0	0	0	8
OG0000770	1	0	1	0	1	1	1	1	0	0	1	1	1	0	1	0	6
OG0000778	1	0	1	1	1	1	1	1	1	1	0	1	0	0	0	0	9
OG0000779	1	0	1	1	1	1	1	1	1	1	0	1	0	0	0	0	9
OG0000781	1	1	0	1	1	1	1	1	1	1	1	1	0	0	0	0	9
OG0000782	1	1	0	1	1	1	1	1	1	1	1	0	0	0	1	0	9
OG0000786	1	1	0	1	1	0	1	0	0	1	1	1	0	1	1	1	6
OG0000790	1	1	0	1	0	1	1	1	1	0	1	0	0	0	0	0	7
OG0000798	1	0	0	1	1	1	1	1	1	1	1	0	0	0	0	0	8
OG0000799	1	0	0	1	1	1	1	1	1	1	1	1	0	0	1	0	8
OG0000803	1	1	1	0	1	1	1	1	1	0	0	0	0	0	0	0	8
OG0000806	1	1	1	1	1	1	1	1	1	1	1	0	0	0	0	0	10
OG0000809	1	1	0	1	1	1	1	1	1	1	1	1	0	0	0	0	9
OG0000811	1	0	0	1	0	1	1	1	1	1	1	1	1	0	1	0	7
OG0000813	1	1	0	1	1	1	1	1	1	0	0	1	1	0	1	0	8
OG0000816	1	0	1	1	1	1	1	1	1	0	1	1	0	0	1	0	8
OG0000818	1	1	0	1	1	1	1	1	1	0	1	1	1	0	0	0	8
OG0000821	1	1	1	1	0	1	1	1	1	1	1	0	1	0	0	0	9
OG0000827	1	0	0	1	1	1	1	1	1	1	1	1	0	0	1	0	8
OG0000829	1	1	1	0	1	1	0	1	1	1	0	0	0	0	0	0	8
OG0000839	1	1	0	1	1	1	1	1	1	1	0	1	0	0	0	0	9
OG0000842	1	1	1	1	1	1	1	1	1	0	1	1	0	0	0	0	9
OG0000843	1	1	1	0	1	1	1	1	1	1	1	1	0	0	0	0	9
OG0000844	1	1	0	1	1	1	1	1	1	0	1	1	0	0	0	0	8
OG0000846	1	0	0	1	1	1	1	1	1	1	1	1	1	0	0	0	8
OG0000850	1	0	1	1	1	1	1	1	1	0	1	1	0	0	1	0	8
OG0000853	1	0	1	1	0	1	1	1	1	1	1	0	0	0	1	0	8
OG0000857	1	0	1	1	0	0	1	1	1	1	1	1	1	0	1	0	7
OG0000861	1	1	0	1	1	1	1	1	1	1	0	1	0	0	1	0	9
OG0000872	1	1	1	1	1	1	1	1	1	1	1	0	0	0	0	0	10
OG0000873	1	1	1	1	1	1	1	1	1	1	1	0	0	0	0	0	10
OG0000889	1	1	0	0	0	1	1	1	1	1	1	1	1	0	1	0	7
OG0000899	1	0	0	1	1	1	1	1	1	1	1	0	0	0	0	0	8
OG0000900	1	1	1	1	1	1	1	1	1	1	1	0	0	0	0	0	10
OG0000901	1	1	1	1	1	1	1	1	1	1	1	0	0	0	0	0	10
OG0000902	1	1	1	1	1	1	1	1	1	1	1	0	0	0	0	0	10
OG0000903	1	1	0	1	1	1	1	1	1	0	1	0	0	0	0	0	8
OG0000905	1	1	1	0	1	1	1	1	0	1	1	1	0	0	1	0	8
OG0000906	1	1	1	0	1	1	1	0	0	1	1	1	0	0	1	0	7
OG0000910	1	0	0	1	1	1	1	1	1	1	1	1	0	0	1	0	8
OG0000925	1	1	0	1	0	1	1	1	1	0	0	1	1	0	0	0	7
OG0000928	1	0	0	1	1	1	0	1	1	1	1	1	1	0	1	0	7
OG0000929	1	0	0	1	1	1	1	1	1	1	1	1	1	0	0	0	8
OG0000933	1	1	0	1	0	1	1	1	1	0	1	1	1	0	1	0	7
OG0000934	1	1	1	0	1	1	0	1	1	0	1	1	1	0	1	0	7
OG0000936	1	1	1	1	0	1	1	1	1	1	1	1	0	0	0	0	9
OG0000938	1	0	0	1	1	1	1	1	1	0	1	1	0	0	1	0	7
OG0000943	1	1	0	1	0	1	1	1	1	1	1	1	0	0	0	0	8
OG0000946	1	0	1	1	1	1	1	1	1	0	1	0	0	0	0	0	8
OG0000950	1	1	0	1	1	1	1	1	1	0	1	1	1	0	0	0	8
OG0000958	0	1	0	0	1	1	1	1	0	1	1	1	1	0	0	0	6
OG0000961	0	1	0	1	1	1	1	1	1	0	0	0	0	0	0	0	7
OG0000963	0	1	0	1	1	1	0	1	1	1	1	1	1	0	1	0	7
OG0000966	0	1	1	0	0	1	1	1	1	1	1	1	1	0	1	0	7
OG0000973	0	1	0	1	1	1	1	1	1	1	1	0	0	0	0	0	8
OG0000977	0	1	0	1	1	1	1	1	1	0	1	1	0	0	1	0	7
OG0000980	0	1	1	0	1	0	1	1	0	1	1	1	1	0	1	0	6
OG0000987	0	0	1	1	1	0	1	1	0	1	0	1	1	0	1	0	6
OG0000990	0	0	1	1	1	0	1	0	0	1	1	1	1	0	1	0	5
OG0001004	0	0	0	1	1	1	1	1	1	0	1	1	1	0	1	0	6
OG0001006	1	1	0	1	1	1	1	1	1	1	1	0	0	0	0	0	9
OG0001007	1	0	1	1	0	1	1	1	1	0	1	1	0	0	1	0	7
OG0001015	1	1	0	1	1	1	0	1	1	0	1	0	0	0	1	0	7
OG0001016	1	0	0	1	0	1	1	1	1	1	0	0	0	0	0	0	7
OG0001018	1	1	0	0	1	1	1	1	1	0	1	1	1	0	0	0	7
OG0001020	1	1	0	0	0	1	1	1	1	0	1	1	0	0	1	0	6
OG0001022	1	0	1	1	0	1	1	1	1	0	0	1	0	0	0	0	7
OG0001023	1	0	1	0	1	1	0	1	0	0	1	1	1	0	1	0	5
OG0001028	1	1	0	1	1	1	1	1	1	0	0	0	0	0	0	0	8
OG0001029	1	1	0	1	0	1	1	1	1	0	1	1	0	0	0	0	7
OG0001033	1	1	1	1	0	1	1	1	0	0	1	1	1	0	0	0	7
OG0001034	1	0	1	1	0	1	1	1	1	0	1	1	0	0	1	0	7
OG0001040	1	1	0	1	0	1	1	1	1	1	1	1	0	0	0	0	8
OG0001042	1	1	0	1	1	1	1	1	1	0	0	1	0	0	0	0	8
OG0001044	1	0	0	1	1	1	1	1	1	1	0	0	0	0	0	0	8
OG0001047	1	1	0	1	0	1	1	1	1	0	1	0	0	0	0	0	7
OG0001048	1	1	0	1	0	0	1	1	1	0	1	1	1	0	1	0	6
OG0001051	1	0	1	1	1	1	1	1	1	1	1	0	0	0	0	0	9
OG0001055	1	1	1	1	1	1	1	1	1	1	0	0	0	0	0	0	10
OG0001056	1	1	1	1	1	1	1	1	1	1	0	0	0	0	0	0	10
OG0001057	1	1	1	1	1	1	1	1	1	1	0	0	0	0	0	0	10
OG0001062	1	1	1	1	1	1	1	1	1	0	1	0	0	0	0	0	9
OG0001063	1	1	0	1	1	1	1	1	1	0	1	1	0	0	0	0	8
OG0001064	1	1	0	1	1	1	1	1	1	0	1	1	0	0	0	0	8
OG0001065	1	1	0	1	1	1	1	1	1	0	1	1	0	0	0	0	8
OG0001066	1	1	0	1	0	1	1	1	1	0	1	1	0	0	1	0	7
OG0001067	1	1	0	1	0	1	1	1	1	0	1	1	0	0	1	0	7
OG0001068	1	1	0	1	0	1	1	1	1	0	1	0	0	0	0	0	7
OG0001076	1	1	1	1	1	1	0	1	1	0	1	0	0	0	0	0	8
OG0001083	1	1	0	1	1	1	1	1	1	1	1	0	0	0	0	0	9
OG0001086	1	0	1	0	1	1	1	1	1	1	1	0	0	0	0	0	8
OG0001091	1	1	0	1	0	1	1	1	1	1	1	0	0	0	0	0	8
OG0001094	1	1	1	1	1	1	1	1	0	0	1	1	0	0	0	0	8
OG0001098	1	0	0	1	1	1	1	1	1	1	1	0	0	0	0	0	8
OG0001099	1	0	1	1	0	1	0	1	1	0	1	1	1	0	0	0	6
OG0001106	1	0	1	1	1	1	1	1	1	1	1	0	0	0	0	0	9
OG0001110	1	0	0	1	1	1	1	1	1	1	1	1	0	0	0	0	8
OG0001120	1	1	1	1	1	1	1	1	1	0	1	0	0	0	0	0	9
OG0001132	1	0	1	1	1	1	1	1	1	1	1	0	0	0	0	0	9
OG0001133	1	0	1	0	1	1	1	1	1	1	1	0	1	0	0	0	8
OG0001134	1	1	1	1	1	1	1	1	1	0	1	0	0	0	0	0	9
OG0001135	1	1	1	1	1	1	1	1	1	0	1	0	0	0	0	0	9
OG0001136	1	1	1	1	1	1	1	1	1	0	1	0	0	0	0	0	9
OG0001137	1	1	1	1	1	1	1	1	1	0	1	0	0	0	0	0	9
OG0001139	1	0	0	1	0	1	1	1	1	0	1	0	0	0	0	0	6
OG0001151	1	1	0	1	0	1	1	1	1	1	1	1	0	0	0	0	8
OG0001152	1	0	0	1	1	1	1	1	1	1	1	1	0	0	0	0	8
OG0001153	1	0	0	1	1	1	1	0	1	1	1	1	0	0	1	0	7
OG0001158	1	1	0	0	1	1	1	1	1	1	1	1	0	0	0	0	8
OG0001159	1	1	0	1	0	1	1	1	1	1	1	1	0	0	0	0	8
OG0001165	1	0	0	1	1	1	0	1	1	0	1	1	1	0	1	0	6
OG0001172	1	1	0	1	0	1	1	1	1	0	1	1	0	0	1	0	7
OG0001173	1	1	1	1	0	1	1	1	1	0	1	1	0	0	0	0	8
OG0001176	1	0	1	1	1	1	1	1	0	0	1	0	1	0	0	0	7
OG0001177	1	0	1	1	1	0	1	1	0	0	1	1	1	0	1	0	6
OG0001181	1	1	0	1	1	1	1	1	1	0	1	1	0	0	0	0	8
OG0001184	1	0	0	1	1	1	1	1	1	0	1	1	0	0	1	0	7
OG0001185	1	1	0	1	0	0	0	1	0	1	0	1	1	1	1	0	5
OG0001205	0	1	0	0	1	1	1	1	1	0	1	1	0	0	1	0	6
OG0001206	0	1	1	1	0	1	0	1	1	1	0	1	1	0	1	0	7
OG0001211	0	1	1	1	1	1	1	1	1	1	1	0	0	0	0	0	9
OG0001212	0	1	1	1	1	0	0	1	0	1	1	1	1	0	1	0	6
OG0001218	0	1	1	0	1	1	1	1	1	0	0	1	1	0	1	0	7
OG0001222	0	1	0	1	1	1	0	1	1	1	0	0	0	0	1	0	7
OG0001227	0	1	0	0	1	0	1	1	0	1	1	1	1	0	1	0	5
OG0001230	0	1	0	1	1	0	1	1	1	1	1	1	1	0	0	0	7
OG0001234	0	1	0	1	1	1	1	1	1	0	1	1	0	0	0	0	7
OG0001236	0	1	0	1	1	0	0	1	1	1	1	1	1	0	1	0	6
OG0001241	0	1	0	1	1	1	1	1	1	0	1	1	0	0	1	0	7
OG0001245	0	1	0	1	1	0	1	1	1	1	1	1	0	0	1	0	7
OG0001250	0	0	1	0	1	0	1	1	1	1	1	0	0	0	0	0	6
OG0001262	0	0	1	1	0	1	1	1	1	1	1	0	1	0	0	0	7
OG0001286	0	0	0	0	0	0	0	0	0	0	0	1	0	0	0	0	0
OG0001288	1	1	0	1	1	0	1	1	1	0	1	1	0	0	0	0	7
OG0001289	1	1	0	1	0	1	0	1	1	0	1	1	0	0	1	0	6
OG0001291	1	0	0	1	1	0	1	1	1	1	1	0	0	0	0	0	7
OG0001293	1	0	0	1	1	1	1	1	1	1	1	0	0	0	0	0	8
OG0001301	1	0	0	1	1	1	1	1	1	0	1	0	0	0	0	0	7
OG0001302	1	1	0	0	1	1	1	1	1	0	1	1	0	0	0	0	7
OG0001308	1	0	0	1	0	1	1	1	1	0	0	1	1	0	0	0	6
OG0001309	1	1	1	1	1	1	1	1	1	0	0	0	0	0	0	0	9
OG0001312	1	1	0	1	1	1	1	1	1	0	1	0	0	0	0	0	8
OG0001315	1	0	0	1	1	0	0	1	1	0	0	1	1	0	1	0	5
OG0001316	1	0	0	1	0	1	1	1	1	0	1	1	0	0	1	0	6
OG0001317	1	1	0	1	0	1	1	1	1	0	1	0	1	0	0	0	7
OG0001318	1	1	0	0	1	1	1	1	1	1	1	0	0	0	0	0	8
OG0001320	1	0	1	0	0	1	1	1	1	1	0	1	0	0	0	0	7
OG0001321	1	0	0	1	1	1	1	1	1	1	0	1	0	0	0	0	8
OG0001322	1	1	0	0	0	0	0	0	1	0	0	1	0	0	1	0	3
OG0001323	1	1	1	0	0	1	1	1	1	1	1	0	0	0	0	0	8
OG0001324	1	1	1	0	1	1	1	1	1	1	0	0	0	0	0	0	9
OG0001325	1	1	1	0	1	1	1	1	1	1	0	0	0	0	0	0	9
OG0001326	1	1	1	0	1	1	1	1	1	1	0	0	0	0	0	0	9
OG0001333	1	1	1	1	0	1	1	1	1	1	0	0	0	0	0	0	9
OG0001334	1	1	0	1	1	1	1	1	1	1	0	0	0	0	0	0	9
OG0001336	1	0	0	1	1	1	1	1	1	1	0	1	0	0	0	0	8
OG0001337	1	1	0	1	0	1	1	1	1	0	1	1	0	0	0	0	7
OG0001338	1	1	0	1	0	1	1	1	1	0	1	1	0	0	0	0	7
OG0001339	1	1	0	1	0	1	1	1	1	1	1	0	0	0	0	0	8
OG0001342	1	1	0	1	1	1	1	1	1	0	1	0	0	0	0	0	8
OG0001345	1	1	0	1	1	1	0	1	0	0	1	1	1	0	0	0	6
OG0001348	1	0	1	1	1	1	0	1	1	0	1	0	0	0	0	0	7
OG0001359	1	0	0	1	0	1	0	0	1	1	1	1	1	0	1	0	5
OG0001361	1	1	0	0	1	0	1	1	1	1	1	0	0	0	0	0	7
OG0001364	1	1	1	1	1	1	1	1	1	0	0	0	0	0	0	0	9
OG0001365	1	1	1	1	1	1	1	1	1	0	0	0	0	0	0	0	9
OG0001367	1	1	0	1	0	1	1	1	1	1	1	0	0	0	0	0	8
OG0001371	1	0	0	1	1	1	1	1	1	1	1	0	0	0	0	0	8
OG0001374	1	0	1	1	0	1	1	1	1	1	1	0	0	0	0	0	8
OG0001379	1	0	1	1	1	1	1	1	1	0	1	0	0	0	0	0	8
OG0001384	1	1	0	1	0	1	1	1	1	0	0	1	0	0	1	0	7
OG0001386	1	0	1	1	1	1	1	1	1	1	0	0	0	0	0	0	9
OG0001387	1	0	1	1	0	1	1	1	1	1	0	1	0	0	0	0	8
OG0001388	1	0	1	1	0	1	1	1	1	1	0	1	0	0	0	0	8
OG0001389	1	1	0	1	1	1	1	1	1	0	1	0	0	0	0	0	8
OG0001390	1	0	0	1	1	1	1	1	1	1	1	0	0	0	0	0	8
OG0001393	1	1	1	1	1	1	0	1	1	0	1	0	0	0	0	0	8
OG0001396	1	1	0	0	1	0	0	1	1	1	1	1	0	0	1	0	6
OG0001399	1	0	0	1	1	1	1	1	1	1	1	0	0	0	0	0	8
OG0001400	1	0	0	1	1	1	1	1	1	1	1	0	0	0	0	0	8
OG0001402	1	0	0	0	1	1	1	1	1	1	1	1	0	0	0	0	7
OG0001403	1	0	0	1	0	1	1	1	1	1	1	1	0	0	0	0	7
OG0001416	1	0	1	0	1	1	1	1	1	1	1	0	0	0	0	0	8
OG0001417	1	0	0	1	1	1	1	1	1	1	1	0	0	0	0	0	8
OG0001418	1	0	0	1	1	1	1	1	1	1	1	0	0	0	0	0	8
OG0001420	1	0	0	1	1	1	1	1	1	1	1	0	0	0	0	0	8
OG0001422	1	0	0	1	1	1	1	0	1	1	1	1	0	0	0	0	7
OG0001427	1	0	0	1	1	1	0	1	1	0	1	1	0	0	1	0	6
OG0001431	1	1	0	1	0	1	1	1	1	0	0	1	1	0	0	0	7
OG0001432	1	0	0	1	0	1	1	1	1	1	1	1	0	0	0	0	7
OG0001433	1	0	0	0	1	1	1	1	1	0	1	1	1	0	0	0	6
OG0001435	1	1	1	1	1	1	0	1	1	0	1	0	0	0	0	0	8
OG0001439	1	1	1	1	1	0	0	1	1	1	1	0	0	0	0	0	8
OG0001440	1	0	1	1	0	1	1	1	1	1	1	0	0	0	0	0	8
OG0001441	1	0	1	1	0	1	1	1	1	1	1	0	0	0	0	0	8
OG0001447	1	0	1	1	1	1	1	1	1	0	1	0	0	0	0	0	8
OG0001448	1	0	1	1	1	1	1	1	0	1	1	0	0	0	0	0	8
OG0001450	1	1	0	0	0	1	1	0	0	0	1	1	1	0	1	0	4
OG0001453	0	1	1	1	1	1	1	1	1	1	0	0	0	0	0	0	9
OG0001454	0	1	1	1	1	1	1	1	1	1	0	0	0	0	0	0	9
OG0001474	0	1	0	1	1	0	1	1	1	1	1	0	0	0	1	0	7
OG0001482	0	1	0	1	1	0	1	1	1	0	1	0	0	0	0	0	6
OG0001488	0	1	0	1	1	1	1	0	1	1	1	0	1	0	0	0	7
OG0001489	0	1	0	1	1	1	1	1	1	1	0	1	0	0	0	0	8
OG0001492	0	1	1	0	1	0	1	1	0	1	1	1	1	0	0	0	6
OG0001497	0	1	1	1	1	0	0	0	1	0	1	1	1	0	1	0	5
OG0001502	0	0	1	0	1	1	1	1	1	1	0	0	0	0	0	0	7
OG0001504	0	0	1	1	0	1	1	1	0	1	1	1	0	0	0	0	6
OG0001507	0	0	1	1	1	1	1	1	1	1	1	0	0	0	0	0	8
OG0001513	0	0	0	1	0	1	1	1	1	1	1	1	0	0	0	0	6
OG0001517	0	0	0	1	1	0	1	1	1	1	1	1	1	0	0	0	6
OG0001523	0	0	0	0	1	1	0	0	0	1	0	0	0	0	1	0	3
OG0001527	0	0	0	0	0	1	1	1	1	0	1	1	1	0	1	0	4
OG0001530	0	0	0	0	0	0	0	0	0	0	0	1	0	0	1	0	0
OG0001531	1	0	0	1	1	1	1	1	1	0	1	0	0	0	0	0	7
OG0001533	1	0	1	0	0	1	0	1	0	0	1	1	1	0	1	0	4
OG0001540	1	0	0	1	0	1	1	1	1	1	1	0	0	0	0	0	7
OG0001541	1	0	0	1	1	1	1	1	1	0	1	0	0	0	0	0	7
OG0001542	1	1	0	1	1	1	1	1	1	0	0	0	0	0	0	0	8
OG0001543	1	1	0	1	1	1	1	1	1	0	0	0	0	0	0	0	8
OG0001545	1	0	0	0	1	1	1	1	1	1	1	0	0	0	0	0	7
OG0001547	1	0	0	1	0	1	1	1	1	1	1	0	0	0	0	0	7
OG0001548	1	0	1	0	0	1	1	1	1	1	0	0	0	0	0	0	7
OG0001550	1	0	1	1	0	1	0	1	1	0	0	0	0	0	0	0	6
OG0001551	1	0	0	0	1	1	1	1	1	0	0	0	0	0	0	0	6
OG0001553	1	1	1	0	0	1	1	1	1	1	0	0	0	0	0	0	8
OG0001554	1	1	0	1	1	0	1	1	1	0	1	0	0	0	0	0	7
OG0001557	1	1	0	1	0	1	1	1	1	0	1	0	0	0	0	0	7
OG0001558	1	0	0	0	1	1	1	1	1	1	1	0	0	0	0	0	7
OG0001560	1	0	0	1	0	1	1	1	1	0	1	1	0	0	0	0	6
OG0001561	1	1	0	0	1	1	1	1	1	0	0	0	0	0	0	0	7
OG0001568	1	0	0	1	1	1	1	1	1	1	0	0	0	0	0	0	8
OG0001570	1	0	0	0	1	1	1	1	1	1	1	0	0	0	0	0	7
OG0001571	1	1	0	1	1	1	0	1	1	0	1	0	0	0	0	0	7
OG0001572	1	1	0	1	1	1	1	1	0	0	0	0	0	0	0	0	7
OG0001573	1	0	1	1	0	1	0	1	1	1	1	0	0	0	0	0	7
OG0001575	1	0	0	1	1	1	1	1	1	1	0	0	0	0	0	0	8
OG0001576	1	1	0	1	1	0	1	1	0	1	1	0	0	0	0	0	7
OG0001578	1	0	0	0	1	1	1	1	1	1	1	0	0	0	0	0	7
OG0001581	1	0	0	0	1	1	1	1	0	1	0	1	0	0	1	0	6
OG0001583	1	0	0	1	1	1	1	1	1	0	1	0	0	0	0	0	7
OG0001588	1	0	0	0	1	1	1	1	1	1	1	0	0	0	0	0	7
OG0001589	1	0	0	0	1	1	1	1	1	1	1	0	0	0	0	0	7
[truncated: 3,590 more rows]
